# Supplementary material for: Computational insight into the mechanism and stereoselectivity of cycloaddition between donor–acceptor spirocyclopropane and aldehyde catalyzed by Brønsted acid TsOH
Source: Royal Society of Chemistry journal article supplement (doi:10.1039/d2ob00140c), 2022-01-01
Supplement: d2ob00140c1.pdf [file d2ob00140c1.pdf]

## Supporting Information

### **Computational Insight into the Mechanism and Stereoselectivity of Cycloaddition between Donor-acceptor Spirocyclopropane and Aldehyde Catalyzed by Brønsted Acid TsOH**

Yao Chen, Yan Zhang, Ying Xue\*

College of Chemistry,

Key Lab of Green Chemistry and Technology in Ministry of Education,

Sichuan University, Chengdu 610064,

People's Republic of China

#### **Content:**

Fig. S1. Optimized structures and Gibbs free energy barriers of the transition states of the rate-determining steps of paths A, B, C and D in reaction between aldehyde 2a and ion-pair complex 1a-TsOH-N (in dichloromethane, 273.15K, energies are given in kcal/mol)..... S2

Table S1. List of absolute energies of optimized structures in this article.....S3

The optimized Cartesian coordinates (Å) for ground state and transition state geometries along the potential energy profiles in dichloromethane.....S5

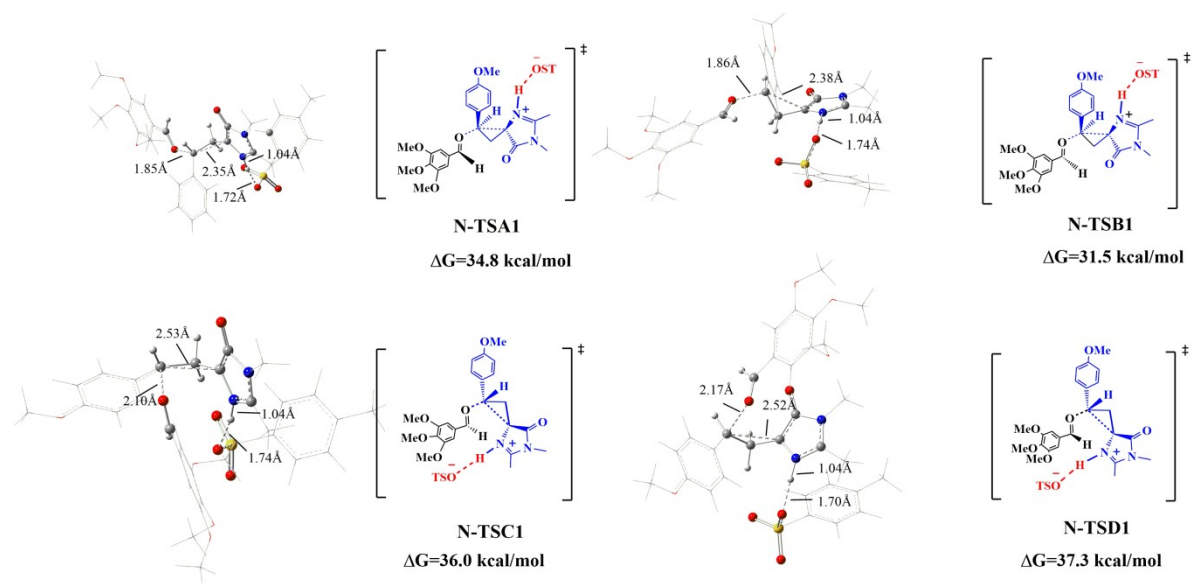

**Figure S1.** Optimized structures and Gibbs free energy barriers of the transition states of the rate-determining steps of paths A, B, C and D in reaction between aldehyde **2a** and ion-pair complex **1a-TsOH-N** (in dichloromethane, 273.15 K, energies are given in kcal/mol).

**Table S1. List of absolute energies of optimized structures in this article.**

| Compounds        | $E$ (a.u.) <sup>a</sup> | $G_{\text{corr}}$ (a.u.) <sup>b</sup> | $G_{\text{sol}}$ (a.u.) <sup>c</sup> | Imag Freq(cm <sup>-1</sup> ) <sup>d</sup> |
|------------------|-------------------------|---------------------------------------|--------------------------------------|-------------------------------------------|
| <b>1a</b>        | -802.976125987          | 0.239108                              | -802.737017987                       |                                           |
| <b>2a</b>        | -689.055362055          | 0.169349                              | -688.886013055                       |                                           |
| <b>TsOH</b>      | -895.310529745          | 0.108665                              | -895.201864745                       |                                           |
| <b>1a-TsOH-O</b> | -1698.308615220         | 0.368802                              | -1697.939813220                      |                                           |
| <b>1a-TsOH-N</b> | -1698.321215210         | 0.369754                              | -1697.951461210                      |                                           |
| <b>TSA1</b>      | -2387.344239310         | 0.559706                              | -2386.784533310                      | 118.32 <i>i</i>                           |
| <b>TSB1</b>      | -2387.340444320         | 0.563183                              | -2386.777261320                      | 307.59 <i>i</i>                           |
| <b>TSC1</b>      | -2387.322628990         | 0.559776                              | -2386.762852990                      | 143.11 <i>i</i>                           |
| <b>TSD1</b>      | -2387.343221750         | 0.562473                              | -2386.780748750                      | 68.21 <i>i</i>                            |
| <b>INTA1</b>     | -2387.364520460         | 0.568806                              | -2386.795714460                      |                                           |
| <b>INTB1</b>     | -2387.375803340         | 0.567986                              | -2386.807817340                      |                                           |
| <b>INTC1</b>     | -2387.345340060         | 0.564428                              | -2386.780912060                      |                                           |
| <b>INTD1</b>     | -2387.380236650         | 0.566414                              | -2386.813822650                      |                                           |
| <b>TSA2</b>      | -2387.363441520         | 0.570536                              | -2386.792905520                      | 40.84 <i>i</i>                            |
| <b>TSD2</b>      | -2387.381352800         | 0.566247                              | -2386.815105800                      | 68.68 <i>i</i>                            |
| <b>INTA2</b>     | -2387.378602450         | 0.567927                              | -2386.810675450                      |                                           |
| <b>INTD2</b>     | -2387.384050080         | 0.567688                              | -2386.816362080                      |                                           |
| <b>TSA3</b>      | -2387.380047200         | 0.566426                              | -2386.813621200                      | 246.00 <i>i</i>                           |
| <b>TSD3</b>      | -2387.385378380         | 0.566827                              | -2386.818551380                      | 108.31 <i>i</i>                           |
| <b>3aa</b>       | -2387.414561220         | 0.566610                              | -2386.847951220                      |                                           |
| <b>3'aa</b>      | -2387.412796320         | 0.568265                              | -2386.844531320                      |                                           |
| <b>3dd</b>       | -2387.413817510         | 0.565347                              | -2386.848470510                      |                                           |
| <b>3'dd</b>      | -2387.414496150         | 0.566884                              | -2386.847612150                      |                                           |
| <b>N-TSA1</b>    | -2387.341700810         | 0.559682                              | -2386.782018810                      | 304.57 <i>i</i>                           |
| <b>N-TSB1</b>    | -2387.348318250         | 0.560996                              | -2386.787322250                      | 288.98 <i>i</i>                           |
| <b>N-TSC1</b>    | -2387.338881100         | 0.560790                              | -2386.778091100                      | 111.65 <i>i</i>                           |
| <b>N-TSD1</b>    | -2387.335166660         | 0.560691                              | -2386.774475660                      | 131.62 <i>i</i>                           |
| <b>2b</b>        | -345.52950960           | 0.082747                              | -345.44676260                        |                                           |
| <b>2c</b>        | -437.76928708           | 0.078826                              | -437.69046108                        |                                           |
| <b>2d</b>        | -349.13341160           | 0.150286                              | -348.98312555                        |                                           |
| <b>2e</b>        | -666.29878192           | 0.049094                              | -666.24968792                        |                                           |
| <b>TSA1-2b</b>   | -2043.818430000         | 0.472249                              | -2043.346181000                      | 142.16 <i>i</i>                           |
| <b>TSA1-2c</b>   | -2136.058567740         | 0.469471                              | -2135.589096740                      | 224.39 <i>i</i>                           |
| <b>TSA1-2d</b>   | -2047.424436620         | 0.540678                              | -2046.883758620                      | 150.22 <i>i</i>                           |
| <b>TSA1-2e</b>   | -2364.594480310         | 0.441893                              | -2364.152587310                      | 119.56 <i>i</i>                           |

a. Electronic energies ( $E$ ) calculated at the M06-2X/SMD/6-311+G(d,p)//B3LYP-D3/SMD/6-31G(d,p) level.

b. Frequency calculations were performed and the thermal free energy corrections ( $G_{\text{corr}}$ ) were obtained

using the experimental temperature 273.15 K at the B3LYP-D3/SMD/6-31G(d,p) level on geometries optimized in the solution phase at the same level of theory.

c. Absolute free energies calculated with the equation:  $G_{\text{sol}} = E + G_{\text{corr}}$ .

d. Imaginary frequency (Imag Freq) was obtained from the optimized transition structure in the solution phase at the B3LYP-D3/SMD/6-31G(d,p) level of theory.

**The optimized Cartesian coordinates (Å) for ground state and transition state geometries along the potential energy profiles in dichloromethane.**

1a

|   |             |             |             |
|---|-------------|-------------|-------------|
| C | -1.83571400 | -1.14632900 | -0.81689800 |
| C | -1.00226400 | -0.84069200 | 0.26524200  |
| C | -1.49485500 | 0.04604000  | 1.24004400  |
| C | -2.76440400 | 0.59724000  | 1.13169600  |
| C | -3.58903500 | 0.27761100  | 0.04071600  |
| C | -3.11771100 | -0.60285600 | -0.94003600 |
| H | -1.48193000 | -1.82891800 | -1.58555600 |
| H | -0.87454900 | 0.31998300  | 2.08611300  |
| H | -3.14122500 | 1.28248900  | 1.88469600  |
| H | -3.72888300 | -0.87185500 | -1.79305600 |
| O | -4.81642400 | 0.87197800  | 0.03160500  |
| C | -5.69606900 | 0.58632600  | -1.05449100 |
| H | -5.95102600 | -0.47999800 | -1.09823900 |
| H | -6.60296100 | 1.16412600  | -0.86692200 |
| H | -5.26555000 | 0.89499300  | -2.01532300 |
| C | 0.35073300  | -1.45843600 | 0.33177800  |
| C | 1.14262300  | -1.62017400 | 1.58843600  |
| H | 0.53112500  | -2.22233100 | -0.42111100 |
| H | 1.75117400  | -2.51364400 | 1.69481200  |
| H | 0.74051300  | -1.20996100 | 2.50945700  |
| C | 1.62336200  | -0.60510800 | 0.57561500  |
| C | 2.81812400  | -0.88495300 | -0.27260700 |
| C | 2.56275300  | 1.31481600  | 0.18608600  |
| N | 1.55632600  | 0.80546700  | 0.81773900  |
| N | 3.35667800  | 0.37518500  | -0.48646800 |
| C | 2.90951400  | 2.76360400  | 0.13824500  |
| H | 2.91261500  | 3.12937500  | -0.89434500 |
| H | 2.17873900  | 3.33111100  | 0.71622200  |
| H | 3.90927900  | 2.93866200  | 0.55070800  |
| C | 4.54036400  | 0.63447000  | -1.28611100 |
| H | 4.30260300  | 1.27229300  | -2.14235500 |
| H | 5.32096000  | 1.11221000  | -0.68738000 |
| H | 4.90559200  | -0.32836200 | -1.64780100 |
| O | 3.24367000  | -1.94999000 | -0.70349200 |

2a

|   |             |             |            |
|---|-------------|-------------|------------|
| C | -1.98752100 | -0.38685900 | 0.07942100 |
| C | -1.08780100 | -1.46098300 | 0.08613100 |

|   |             |             |             |
|---|-------------|-------------|-------------|
| C | 0.28116800  | -1.21239300 | 0.06184700  |
| C | 0.76468300  | 0.11246600  | 0.04484400  |
| C | -0.14773800 | 1.19103100  | 0.00575900  |
| C | -1.51729200 | 0.93034700  | 0.02438200  |
| H | -1.43681300 | -2.48882500 | 0.11145700  |
| H | -2.21770500 | 1.75805600  | 0.00681400  |
| O | 0.22976000  | 2.50064400  | 0.02090900  |
| O | 2.11268400  | 0.36133400  | 0.05529500  |
| O | 1.14776500  | -2.27524800 | 0.13141400  |
| C | 1.34162800  | 2.92517100  | -0.78598000 |
| H | 2.29018500  | 2.80458700  | -0.25786500 |
| H | 1.38225900  | 2.37196000  | -1.72983000 |
| H | 1.16724000  | 3.98368400  | -0.99498100 |
| C | 2.75721600  | 0.10793400  | 1.31887200  |
| H | 2.66207500  | -0.94366500 | 1.60551200  |
| H | 3.81063100  | 0.35617900  | 1.17674700  |
| H | 2.33233500  | 0.74634500  | 2.10199700  |
| C | 1.97751500  | -2.47282300 | -1.02816200 |
| H | 2.57139400  | -3.36669000 | -0.82690900 |
| H | 1.36007400  | -2.63918900 | -1.91922200 |
| H | 2.64223000  | -1.62092900 | -1.19735000 |
| C | -3.43788500 | -0.65749800 | 0.10370500  |
| O | -4.30517900 | 0.20251500  | 0.08175100  |
| H | -3.70798800 | -1.73382900 | 0.14377300  |

## TsOH

|   |             |             |             |
|---|-------------|-------------|-------------|
| C | 1.95337000  | 1.20356900  | 0.00207900  |
| C | 0.56311800  | 1.22063300  | -0.04525400 |
| C | -0.12103500 | 0.00264000  | -0.07291200 |
| C | 0.55411600  | -1.21867100 | -0.06006200 |
| C | 1.94632100  | -1.21181000 | -0.01290000 |
| C | 2.66491200  | -0.00747400 | 0.01825000  |
| H | 2.49723500  | 2.14371200  | 0.02374500  |
| H | 0.01744400  | 2.15754400  | -0.06518200 |
| H | 0.00299500  | -2.15210500 | -0.09194300 |
| H | 2.48308500  | -2.15591900 | -0.00339900 |
| S | -1.89479400 | 0.00731800  | -0.12260000 |
| O | -2.39324900 | -1.24576700 | -0.69761900 |
| O | -2.18088900 | -0.02240700 | 1.49460400  |
| H | -3.14219000 | -0.14751000 | 1.63168400  |
| O | -2.37982200 | 1.28156600  | -0.65927500 |
| C | 4.17128000  | -0.00311700 | 0.04371400  |
| H | 4.57161300  | 0.28219600  | -0.93682700 |
| H | 4.55313300  | 0.72177200  | 0.76999700  |

H 4.57257700 -0.98853900 0.29436500

1a-TSOH-N

C -2.48800200 1.25153400 -0.89455700  
C -3.05613100 0.92610200 0.34162200  
C -3.02420600 1.88566800 1.36395200  
C -2.43181600 3.12581100 1.15822900  
C -1.84169200 3.42938000 -0.07793900  
C -1.88631000 2.48766000 -1.11520700  
H -2.48169600 0.51435600 -1.69213200  
H -3.45913400 1.65661700 2.33262800  
H -2.39282100 3.86723000 1.95005000  
H -1.41747000 2.68701100 -2.06974600  
O -1.26256500 4.65503700 -0.17354700  
C -0.46810700 4.93425000 -1.32926600  
H -1.08007400 4.97428800 -2.23965900  
H -0.02953700 5.91942600 -1.15720700  
H 0.32748500 4.19098700 -1.44223000  
C -3.64679100 -0.42840800 0.56519400  
C -3.43571800 -1.15941700 1.84779500  
H -4.56202000 -0.66693100 0.02463600  
H -4.21259700 -1.82617000 2.20943000  
H -2.81519300 -0.69204700 2.60590800  
C -2.69472100 -1.63817400 0.61355000  
C -3.04733700 -2.91648200 -0.05020700  
C -0.81833200 -2.53934300 -0.23081200  
N -1.27999300 -1.51220900 0.44149900  
N -1.81897700 -3.40771900 -0.54381100  
C 0.59833200 -2.71145100 -0.63116800  
H 0.75916100 -2.20438500 -1.58771800  
H 1.24949700 -2.23636500 0.10296600  
H 0.85286200 -3.76765900 -0.72833300  
C -1.68726700 -4.65611900 -1.28645100  
H -1.23990800 -4.46973600 -2.26463500  
H -1.07927700 -5.37072900 -0.72738800  
H -2.69253900 -5.05781100 -1.41493000  
O -4.12831200 -3.45829900 -0.16951300  
C 4.92053500 -0.66571300 -0.85758400  
C 3.63133000 -0.16772500 -1.04785300  
C 2.87001200 0.21825900 0.05657400  
C 3.39522400 0.10490900 1.34639100  
C 4.68451500 -0.39408600 1.52375100  
C 5.46936500 -0.78376300 0.42736500  
H 5.50770200 -0.97217300 -1.71966200

|   |             |             |             |
|---|-------------|-------------|-------------|
| H | 3.20607500  | -0.09268000 | -2.04313000 |
| H | 2.78990000  | 0.38697900  | 2.20154100  |
| H | 5.08742900  | -0.48842800 | 2.52907200  |
| S | 1.22118200  | 0.90732200  | -0.19122600 |
| O | 0.73464900  | 0.33315100  | -1.47399700 |
| O | 0.43754500  | 0.39616500  | 1.00263000  |
| H | -0.66275000 | -0.67940000 | 0.69201600  |
| O | 1.37494600  | 2.38297900  | -0.17675300 |
| C | 6.87457200  | -1.29553900 | 0.62714500  |
| H | 7.17905300  | -1.96102900 | -0.18637800 |
| H | 7.59201000  | -0.46548200 | 0.65538500  |
| H | 6.97288100  | -1.83990500 | 1.57160900  |

### 1a-TsOH-O

|   |             |             |             |             |
|---|-------------|-------------|-------------|-------------|
| C | -0.88842500 | -1.91495700 | -0.96184500 |             |
| C |             | -1.25427400 | -1.31586000 | 0.25009700  |
| C |             | -1.95459300 | -2.09688700 | 1.18636300  |
| C |             | -2.26977700 | -3.42149800 | 0.91611000  |
| C |             | -1.89117600 | -4.01060100 | -0.30201900 |
| C |             | -1.19397800 | -3.24825900 | -1.24690300 |
| H |             | -0.34929000 | -1.32911100 | -1.70215600 |
| H |             | -2.26784700 | -1.66437500 | 2.13034200  |
| H |             | -2.81253500 | -4.02427800 | 1.63761000  |
| H |             | -0.88778200 | -3.67212300 | -2.19559300 |
| O |             | -2.24616600 | -5.31627600 | -0.46349300 |
| C |             | -1.90877200 | -5.95999700 | -1.69162400 |
| H |             | -0.82341700 | -5.98891400 | -1.84879000 |
| H |             | -2.28573700 | -6.98096800 | -1.60939900 |
| H |             | -2.38615100 | -5.46893500 | -2.54871000 |
| C |             | -0.86677000 | 0.10106700  | 0.47655100  |
| C |             | -0.73912800 | 0.75900500  | 1.80422700  |
| H |             | -0.21337700 | 0.49183600  | -0.29522300 |
| H |             | 0.06036600  | 1.48091500  | 1.93880600  |
| H |             | -1.02376300 | 0.20156500  | 2.69062600  |
| C |             | -1.89907000 | 1.18291800  | 0.92407700  |
| C |             | -1.91589200 | 2.46989300  | 0.19155800  |
| C |             | -3.98213000 | 1.76809300  | 0.73535900  |
| N |             | -3.24887400 | 0.83282300  | 1.23731900  |
| N |             | -3.24173900 | 2.78143400  | 0.09181500  |
| C |             | -5.46793700 | 1.84247700  | 0.78752700  |
| H |             | -5.88968100 | 1.87264200  | -0.22301400 |
| H |             | -5.85498700 | 0.96766800  | 1.31161200  |
| H |             | -5.79597100 | 2.74894100  | 1.30804700  |
| C |             | -3.77333000 | 3.95891100  | -0.57780600 |



|   |             |             |             |
|---|-------------|-------------|-------------|
| H | -4.42230800 | 3.66601300  | -1.40686900 |
| H | -4.33708300 | 4.57637100  | 0.12588300  |
| H | -2.92989800 | 4.53104600  | -0.96547200 |
| O | -0.98610600 | 3.15643300  | -0.27308400 |
| C | 3.53298300  | -1.47210200 | 0.60519700  |
| C | 2.73845300  | -0.56272000 | -0.09106900 |
| C | 3.22399100  | 0.72657900  | -0.31188400 |
| C | 4.48651600  | 1.11469600  | 0.14360900  |
| C | 5.26434100  | 0.19201200  | 0.83693900  |
| C | 4.80187100  | -1.11173400 | 1.07987900  |
| H | 3.16007400  | -2.47730100 | 0.77980200  |
| H | 1.76215600  | -0.85578600 | -0.45907600 |
| H | 4.85250700  | 2.11784200  | -0.04682000 |
| H | 6.24726700  | 0.48560800  | 1.19503700  |
| S | 2.20115800  | 1.91137500  | -1.16594900 |
| O | 1.20244200  | 1.19367900  | -1.97664400 |
| O | 1.45926500  | 2.61139000  | 0.06816300  |
| H | 0.46049800  | 2.80255500  | -0.12730400 |
| O | 3.06724300  | 2.89229800  | -1.82857800 |
| C | 5.66853000  | -2.10027100 | 1.81745900  |
| H | 5.10788900  | -2.99509500 | 2.10065600  |
| H | 6.51340100  | -2.41706500 | 1.19393900  |
| H | 6.08940900  | -1.65563100 | 2.72560000  |

### 1a-TsOH-O+2a Complex

|   |             |             |             |
|---|-------------|-------------|-------------|
| C | -1.87054200 | -3.27244700 | -0.29841300 |
| C | -1.14447400 | -2.07861800 | -0.15040000 |
| C | -1.61841800 | -1.12853300 | 0.76163600  |
| C | -2.79386000 | -1.33297400 | 1.48607200  |
| C | -3.51979100 | -2.51570200 | 1.30593700  |
| C | -3.03904300 | -3.49168100 | 0.41888300  |
| H | -1.52597300 | -4.03882900 | -0.98391000 |
| H | -1.07422700 | -0.19723800 | 0.88818400  |
| H | -3.14419000 | -0.55997100 | 2.15772200  |
| H | -3.60892600 | -4.40696200 | 0.29263700  |
| O | -4.69141900 | -2.81074700 | 1.93844600  |
| C | -5.34791400 | -1.75797600 | 2.64618200  |
| H | -5.53429700 | -0.90325800 | 1.98598700  |
| H | -6.29906100 | -2.17226900 | 2.98654800  |
| H | -4.77118900 | -1.43104400 | 3.52083300  |
| C | 0.07226900  | -1.75549500 | -0.94203400 |
| C | 0.48521400  | -2.45798300 | -2.18219500 |
| H | -0.09849900 | -3.30347100 | -2.52950900 |
| H | 0.96772300  | -1.87333200 | -2.95979500 |

|   |             |             |             |
|---|-------------|-------------|-------------|
| C | 1.31405900  | -2.70575500 | -0.93466800 |
| C | 2.66415000  | -2.12595000 | -0.78410300 |
| C | 2.45193800  | -4.08600200 | 0.29576000  |
| N | 1.28231200  | -3.94950500 | -0.23140000 |
| N | 3.33056800  | -3.02164800 | 0.00326700  |
| C | 2.90137800  | -5.21839700 | 1.15121100  |
| H | 3.18585100  | -4.86155700 | 2.14736400  |
| H | 2.08959800  | -5.94036800 | 1.24899900  |
| H | 3.77614700  | -5.71527000 | 0.71801100  |
| C | 4.70415700  | -2.87027700 | 0.45884400  |
| H | 5.32816700  | -3.67983700 | 0.07162300  |
| H | 5.07560500  | -1.91576100 | 0.08504400  |
| H | 4.74381400  | -2.87223100 | 1.55112200  |
| O | 3.15269200  | -1.07707700 | -1.24506000 |
| C | -2.21868700 | 0.91371100  | -2.10304300 |
| C | -1.63853500 | 2.06450000  | -1.55554200 |
| C | -2.25986100 | 2.72972300  | -0.50026100 |
| C | -3.46895700 | 2.23345900  | 0.02832800  |
| C | -4.06251600 | 1.08921500  | -0.55207400 |
| C | -3.43784800 | 0.43349500  | -1.60341400 |
| H | -0.68962300 | 2.44634400  | -1.91688300 |
| H | -3.88743900 | -0.46063700 | -2.02052900 |
| O | -5.24264000 | 0.58077100  | -0.05846200 |
| O | -4.05690600 | 2.92049900  | 1.05411400  |
| O | -1.69590100 | 3.88282300  | -0.02591100 |
| C | -6.39840200 | 1.40663400  | -0.28598300 |
| H | -6.30728200 | 2.37479700  | 0.21666100  |
| H | -6.55208200 | 1.56719700  | -1.35975700 |
| H | -7.24967800 | 0.85993200  | 0.12439100  |
| C | -4.22914100 | 2.19923800  | 2.28934800  |
| H | -3.26697300 | 1.81414800  | 2.64539800  |
| H | -4.61426200 | 2.92598800  | 3.00720000  |
| H | -4.93886200 | 1.37600600  | 2.18154500  |
| C | -1.14953300 | 3.81009200  | 1.30061300  |
| H | -0.52379000 | 4.69683700  | 1.42182600  |
| H | -1.94081200 | 3.82071600  | 2.05689200  |
| H | -0.52823300 | 2.91680100  | 1.41622900  |
| C | -1.51664200 | 0.19554300  | -3.18091200 |
| O | -1.93409200 | -0.81243200 | -3.73285900 |
| H | -0.54106300 | 0.63845300  | -3.47053800 |
| H | 0.36186500  | -0.71282800 | -0.87825000 |
| H | 2.37998300  | 0.19698300  | -1.58932000 |
| C | 5.36340900  | 0.87258700  | 1.52453700  |
| C | 4.02843100  | 0.87623000  | 1.12315700  |

|   |            |            |             |
|---|------------|------------|-------------|
| C | 3.58421800 | 1.88786100 | 0.27138800  |
| C | 4.44707500 | 2.88940200 | -0.18129300 |
| C | 5.77590400 | 2.86811300 | 0.23056800  |
| C | 6.25582500 | 1.85984300 | 1.08318700  |
| H | 5.71611400 | 0.09065200 | 2.19087000  |
| H | 3.34212300 | 0.11152600 | 1.46739200  |
| H | 4.07981100 | 3.67317300 | -0.83510600 |
| H | 6.45318900 | 3.64537300 | -0.11253300 |
| C | 7.70422100 | 1.84320000 | 1.49981100  |
| H | 7.88883700 | 1.10860500 | 2.28813900  |
| H | 8.34908600 | 1.59320300 | 0.64866200  |
| H | 8.02171800 | 2.82614300 | 1.86383300  |
| S | 1.89305400 | 1.87505500 | -0.29691700 |
| O | 1.46618500 | 3.24227500 | -0.59905500 |
| O | 1.10586900 | 1.06325400 | 0.64530300  |
| O | 1.96237100 | 1.12423800 | -1.71478500 |

## TSA1

|   |            |             |             |             |
|---|------------|-------------|-------------|-------------|
| C | 1.41280200 | -4.00797600 | -0.19278600 |             |
| C |            | 1.21487600  | -2.69641300 | 0.29750500  |
| C |            | 1.25076500  | -2.48242600 | 1.69097500  |
| C |            | 1.47900500  | -3.52542900 | 2.57744000  |
| C |            | 1.67544900  | -4.82293100 | 2.07100300  |
| C |            | 1.63927400  | -5.05364200 | 0.67934300  |
| H |            | 1.40287400  | -4.19648700 | -1.25975100 |
| H |            | 1.10589700  | -1.47383200 | 2.06899400  |
| H |            | 1.50703000  | -3.33070300 | 3.64205400  |
| H |            | 1.79885400  | -6.06467300 | 0.31966800  |
| O |            | 1.90864800  | -5.91228500 | 2.83106100  |
| C |            | 1.99615000  | -5.75945800 | 4.25329800  |
| H |            | 1.05324200  | -5.39211800 | 4.67332300  |
| H |            | 2.20220700  | -6.75627200 | 4.64482300  |
| H |            | 2.81300700  | -5.08374300 | 4.52982100  |
| C |            | 0.95593200  | -1.56143400 | -0.55060600 |
| C |            | 1.29814900  | -1.48583700 | -2.00428600 |
| H |            | 0.99909000  | -2.38053600 | -2.55436600 |
| H |            | 0.80904200  | -0.61491600 | -2.44751100 |
| C |            | 2.79448900  | -1.33022300 | -2.01937900 |
| C |            | 3.54429700  | -0.17067000 | -1.90071400 |
| C |            | 4.87175300  | -1.94770400 | -1.97160600 |
| N |            | 3.64667700  | -2.42531800 | -2.04116000 |
| N |            | 4.86444400  | -0.57055200 | -1.88186800 |
| C |            | 6.13194700  | -2.74518900 | -1.98632300 |
| H |            | 6.71145100  | -2.60675800 | -1.06552000 |

|   |             |             |             |
|---|-------------|-------------|-------------|
| H | 5.87967700  | -3.80359100 | -2.07765800 |
| H | 6.78177800  | -2.46815200 | -2.82515800 |
| C | 6.01719300  | 0.31272500  | -1.80994800 |
| H | 6.48841900  | 0.42499600  | -2.79158700 |
| H | 5.68644200  | 1.29160400  | -1.46227600 |
| H | 6.74892700  | -0.08795200 | -1.10500000 |
| O | 3.25936200  | 1.13435300  | -1.86290800 |
| C | -3.00200800 | -0.29009600 | -0.65707400 |
| C | -3.49748600 | 1.02327000  | -0.68024800 |
| C | -4.86774200 | 1.25682100  | -0.58961500 |
| C | -5.75722800 | 0.16296400  | -0.48722400 |
| C | -5.24414900 | -1.15929000 | -0.47572300 |
| C | -3.87939800 | -1.38404000 | -0.54755100 |
| H | -2.81846200 | 1.86867000  | -0.71805900 |
| H | -3.50339900 | -2.40080800 | -0.54229800 |
| O | -6.09129200 | -2.23610500 | -0.38498200 |
| O | -7.09415700 | 0.41606600  | -0.47736300 |
| O | -5.28645000 | 2.55282500  | -0.64838500 |
| C | -6.87058700 | -2.48732400 | -1.57066900 |
| H | -7.52828200 | -1.64442800 | -1.80572600 |
| H | -6.21414700 | -2.68814400 | -2.42556100 |
| H | -7.47292400 | -3.37222200 | -1.35691500 |
| C | -7.84748900 | -0.04899500 | 0.66459800  |
| H | -7.44132300 | 0.38211400  | 1.58578400  |
| H | -8.86591200 | 0.31031300  | 0.51078000  |
| H | -7.84037800 | -1.13829400 | 0.73456100  |
| C | -6.20236200 | 3.01834000  | 0.35917100  |
| H | -6.08283100 | 4.10369900  | 0.39127200  |
| H | -7.23569100 | 2.76982700  | 0.10757800  |
| H | -5.95068800 | 2.60181300  | 1.34108900  |
| C | -1.56908700 | -0.47385200 | -0.73966800 |
| O | -1.01798500 | -1.58724100 | -0.62554800 |
| H | -0.96087100 | 0.42078600  | -0.91151900 |
| H | 0.99682400  | -0.60550600 | -0.03844300 |
| H | 2.33279900  | 1.30934700  | -1.50875500 |
| C | 3.58348900  | 4.90255700  | 0.65033700  |
| C | 2.89531700  | 3.71844900  | 0.40638200  |
| C | 1.54994800  | 3.61876500  | 0.77837700  |
| C | 0.90224700  | 4.68995700  | 1.38967100  |
| C | 1.60692000  | 5.87215500  | 1.62932200  |
| C | 2.95307400  | 5.99765800  | 1.26603500  |
| H | 4.62769000  | 4.98382400  | 0.35857400  |
| H | 3.39516700  | 2.88520900  | -0.07672700 |
| H | -0.14163600 | 4.59691400  | 1.66894400  |

|   |              |             |              |
|---|--------------|-------------|--------------|
| H | 1. 10059900  | 6. 70807000 | 2. 10468000  |
| C | 3. 72011500  | 7. 27156700 | 1. 51977300  |
| H | 4. 60964300  | 7. 08084300 | 2. 13118400  |
| H | 4. 06834800  | 7. 71588200 | 0. 57991800  |
| H | 3. 10722200  | 8. 01495000 | 2. 03674100  |
| S | 0. 67231800  | 2. 07336000 | 0. 51194800  |
| O | -0. 76723100 | 2. 33714700 | 0. 76004800  |
| O | 1. 29323600  | 1. 06844500 | 1. 41947400  |
| O | 0. 91604900  | 1. 72227000 | -0. 94712000 |

## INTA1

|   |              |              |              |
|---|--------------|--------------|--------------|
| O | 0. 99255200  | -0. 73064900 | -2. 80622400 |
| O | -2. 09824600 | 1. 03127800  | -0. 30393400 |
| O | 6. 41327600  | -2. 04425900 | 0. 32582800  |
| O | 2. 50068600  | 2. 50457800  | 1. 19985400  |
| O | 0. 61786900  | 4. 50447300  | 1. 02225500  |
| O | -0. 99018000 | 4. 72610000  | -0. 99349300 |
| N | -3. 29643300 | -0. 29473100 | -1. 79678100 |
| N | -1. 93529400 | -2. 01776800 | -2. 16679400 |
| C | -1. 31870100 | -1. 14891300 | -1. 27632100 |
| C | -2. 16903500 | -0. 07150600 | -1. 03431600 |
| C | -3. 10475900 | -1. 48784600 | -2. 46297400 |
| C | 0. 39520500  | 0. 43384100  | -2. 72227000 |
| H | -0. 22047700 | 0. 64574000  | -3. 59688700 |
| C | -0. 00499900 | -1. 45460000 | -0. 64873700 |
| H | -0. 07051000 | -2. 37555100 | -0. 05900900 |
| H | 0. 27178400  | -0. 66286300 | 0. 04578900  |
| C | 1. 10239200  | -1. 70549100 | -1. 68075500 |
| H | 0. 87199600  | -2. 62772400 | -2. 22131800 |
| C | 2. 51505500  | -1. 76798700 | -1. 14584900 |
| C | 2. 78690900  | -1. 93155500 | 0. 22209600  |
| H | 1. 98462600  | -1. 95390900 | 0. 95164200  |
| C | 4. 09788600  | -2. 02688200 | 0. 67667300  |
| H | 4. 31042700  | -2. 14491400 | 1. 73452200  |
| C | 5. 17159200  | -1. 95019000 | -0. 22263500 |
| C | 4. 91340500  | -1. 78064300 | -1. 59115400 |
| H | 5. 72139000  | -1. 71267300 | -2. 30951300 |
| C | 3. 59365300  | -1. 70171100 | -2. 03570200 |
| H | 3. 40324700  | -1. 56902000 | -3. 09653900 |
| C | 0. 60597600  | 1. 47737900  | -1. 79769600 |
| C | 1. 55594100  | 1. 42217900  | -0. 74952200 |
| H | 2. 24156300  | 0. 59120300  | -0. 68807500 |
| C | 1. 61012900  | 2. 44127800  | 0. 18351100  |
| C | 0. 69066300  | 3. 52583600  | 0. 11052900  |

|   |             |             |             |
|---|-------------|-------------|-------------|
| C | -0.19436700 | 3.62776300  | -0.99514100 |
| C | -0.24043200 | 2.61077900  | -1.93311000 |
| H | -0.96202700 | 2.63278000  | -2.73950500 |
| C | -4.12501200 | -2.05727700 | -3.38830700 |
| H | -3.74053000 | -2.98677400 | -3.81248900 |
| H | -4.35859500 | -1.36739900 | -4.20795000 |
| H | -5.06607300 | -2.27495300 | -2.86907000 |
| C | 7.54542700  | -1.98167000 | -0.54170300 |
| H | 8.42090900  | -2.09358800 | 0.09990700  |
| H | 7.60209200  | -1.01785600 | -1.06269500 |
| H | 7.53435100  | -2.79259000 | -1.28022000 |
| C | 3.20280100  | 1.30266200  | 1.54919400  |
| H | 2.49598700  | 0.50039000  | 1.78047000  |
| H | 3.78403900  | 1.55103100  | 2.43870800  |
| H | 3.88620700  | 0.99412800  | 0.75071800  |
| C | 0.72103700  | 4.18564100  | 2.43442500  |
| H | 1.75863300  | 4.23253600  | 2.76691200  |
| H | 0.30444200  | 3.19588300  | 2.63412600  |
| H | 0.12966600  | 4.95314400  | 2.93800000  |
| C | -2.00307000 | 4.81634200  | -1.99569900 |
| H | -2.70450400 | 3.97532000  | -1.93124800 |
| H | -1.57282600 | 4.85803200  | -3.00396500 |
| H | -2.53730000 | 5.74648600  | -1.79618500 |
| C | -4.45870000 | 0.57690200  | -1.85312800 |
| H | -4.45845400 | 1.17460600  | -2.77019000 |
| H | -4.43211600 | 1.24521200  | -0.99211700 |
| H | -5.37297400 | -0.01876800 | -1.81388100 |
| H | -1.43954400 | 0.95878100  | 0.46199000  |
| C | -4.19749100 | -1.38044800 | 1.72484700  |
| C | -3.14188600 | -0.56949700 | 2.13420200  |
| C | -1.88612100 | -1.13713400 | 2.36727400  |
| C | -1.69908500 | -2.51182400 | 2.22708400  |
| C | -2.76570000 | -3.31500800 | 1.82185800  |
| C | -4.02490700 | -2.76270200 | 1.55066100  |
| H | -5.16856100 | -0.93364000 | 1.52746800  |
| H | -3.28538600 | 0.50030700  | 2.24112000  |
| H | -0.72010700 | -2.93840500 | 2.41522400  |
| H | -2.61347800 | -4.38452900 | 1.70233300  |
| S | -0.50098400 | -0.06969000 | 2.80204800  |
| O | 0.72102300  | -0.91302800 | 2.69490300  |
| O | -0.53763200 | 1.00969700  | 1.73330200  |
| O | -0.76110000 | 0.48832800  | 4.14965400  |
| C | -5.15413100 | -3.62257400 | 1.04059500  |
| H | -5.14978200 | -3.65206400 | -0.05664200 |

|   |             |             |            |
|---|-------------|-------------|------------|
| H | -5.06571200 | -4.65450500 | 1.39341900 |
| H | -6.12862900 | -3.23434500 | 1.35266200 |

## TSA2

|             |             |             |             |
|-------------|-------------|-------------|-------------|
| 01.01489000 | -0.73265500 | -2.77767100 |             |
| O           | -2.15202400 | 0.96497400  | -0.27237600 |
| O           | 6.44393700  | -1.96552200 | 0.35803300  |
| O           | 2.52314300  | 2.62132900  | 1.04072500  |
| O           | 0.59075900  | 4.57205400  | 0.90681100  |
| O           | -1.16632100 | 4.66498300  | -1.00673000 |
| N           | -3.29653700 | -0.37279900 | -1.78328900 |
| N           | -1.86581000 | -2.02931300 | -2.20203200 |
| C           | -1.27767500 | -1.15516600 | -1.29445600 |
| C           | -2.18209800 | -0.12129500 | -1.01718400 |
| C           | -3.05581700 | -1.54275100 | -2.48032100 |
| C           | 0.28377500  | 0.36184300  | -2.68837700 |
| H           | -0.38959500 | 0.49910500  | -3.53439200 |
| C           | 0.02129500  | -1.46114700 | -0.63646400 |
| H           | -0.05811500 | -2.37612800 | -0.03988400 |
| H           | 0.29135600  | -0.66047800 | 0.05107700  |
| C           | 1.13288600  | -1.71413900 | -1.65992000 |
| H           | 0.91497900  | -2.64289000 | -2.19494700 |
| C           | 2.54357400  | -1.75520400 | -1.11972500 |
| C           | 2.81691900  | -1.86865200 | 0.25273500  |
| H           | 2.01517200  | -1.87093000 | 0.98303200  |
| C           | 4.12847800  | -1.94164500 | 0.71023000  |
| H           | 4.34178100  | -2.02205500 | 1.77148300  |
| C           | 5.20128000  | -1.89292400 | -0.19196000 |
| C           | 4.94189700  | -1.77152600 | -1.56552900 |
| H           | 5.74971200  | -1.72450700 | -2.28571700 |
| C           | 3.62174300  | -1.71417200 | -2.01178000 |
| H           | 3.42989300  | -1.61905900 | -3.07648300 |
| C           | 0.50074800  | 1.45759000  | -1.81985400 |
| C           | 1.51498300  | 1.46644200  | -0.83485800 |
| H           | 2.22790300  | 0.65685000  | -0.79252300 |
| C           | 1.58557300  | 2.51189900  | 0.06932200  |
| C           | 0.63326200  | 3.56622900  | 0.01687100  |
| C           | -0.32513600 | 3.60001800  | -1.02778700 |
| C           | -0.39524500 | 2.55122200  | -1.93119700 |
| H           | -1.16831600 | 2.52041000  | -2.68782400 |
| C           | -4.05623200 | -2.13288900 | -3.41332900 |
| H           | -3.63070400 | -3.02750500 | -3.87152500 |
| H           | -4.33362800 | -1.42803800 | -4.20573500 |
| H           | -4.97718600 | -2.41479500 | -2.88910500 |

|   |             |             |             |
|---|-------------|-------------|-------------|
| C | 7.57478100  | -1.92635500 | -0.51248400 |
| H | 8.45164300  | -2.01134700 | 0.13145500  |
| H | 7.62544000  | -0.98043700 | -1.06604300 |
| H | 7.56791800  | -2.76208400 | -1.22301800 |
| C | 3.23302700  | 1.43124900  | 1.41501100  |
| H | 2.53167800  | 0.64136800  | 1.70060100  |
| H | 3.84392600  | 1.71153300  | 2.27480300  |
| H | 3.88971200  | 1.08630200  | 0.60913800  |
| C | 0.70879000  | 4.26757400  | 2.31980000  |
| H | 1.75112200  | 4.30381300  | 2.63948500  |
| H | 0.28388700  | 3.28439700  | 2.53643500  |
| H | 0.13353600  | 5.04538200  | 2.82676100  |
| C | -2.29764000 | 4.63116900  | -1.87731300 |
| H | -2.91867900 | 3.74773300  | -1.68557700 |
| H | -1.99913300 | 4.64715300  | -2.93276600 |
| H | -2.87168500 | 5.53222400  | -1.65577800 |
| C | -4.49163900 | 0.45585500  | -1.81803500 |
| H | -4.47597200 | 1.13470800  | -2.67644100 |
| H | -4.53486500 | 1.04190800  | -0.89972500 |
| H | -5.37720200 | -0.17882000 | -1.87834800 |
| H | -1.46126400 | 0.93081500  | 0.47771100  |
| C | -4.14396100 | -1.45271900 | 1.80518700  |
| C | -3.10825500 | -0.60420900 | 2.18816800  |
| C | -1.82990600 | -1.12829900 | 2.40050200  |
| C | -1.60039200 | -2.49728300 | 2.26806400  |
| C | -2.64734400 | -3.33836000 | 1.88871300  |
| C | -3.92868500 | -2.82974800 | 1.63658900  |
| H | -5.13342200 | -1.04019200 | 1.62546100  |
| H | -3.28614600 | 0.46068000  | 2.29231300  |
| H | -0.60499600 | -2.89010500 | 2.44300200  |
| H | -2.46246100 | -4.40339700 | 1.77589500  |
| S | -0.47210600 | -0.01125000 | 2.79580300  |
| O | 0.77314800  | -0.82057400 | 2.70623700  |
| O | -0.54262800 | 1.03451200  | 1.69319100  |
| O | -0.74355300 | 0.58160800  | 4.12551000  |
| C | -5.03956700 | -3.73042300 | 1.15735300  |
| H | -5.06216200 | -3.76359000 | 0.06032500  |
| H | -4.90647600 | -4.75722200 | 1.51099000  |
| H | -6.01883100 | -3.37479200 | 1.49260700  |

## INTA2

|   |            |            |             |
|---|------------|------------|-------------|
| C | 4.78498500 | 1.13003800 | -0.66646300 |
| C |            | 4.25651700 | -0.03408200 |
| C |            | 5.00538600 | -1.21057700 |



|   |             |             |             |
|---|-------------|-------------|-------------|
| C | 6.26218000  | -1.24398300 | -0.74805800 |
| C | 6.77537600  | -0.07777800 | -1.33012100 |
| C | 6.02359500  | 1.11014100  | -1.28978200 |
| H | 4.21339100  | 2.05324200  | -0.64026000 |
| H | 4.60771000  | -2.12105700 | 0.30320700  |
| H | 6.81956800  | -2.17245900 | -0.76933300 |
| H | 6.43653300  | 2.00250100  | -1.74932700 |
| O | 7.97931100  | 0.01062500  | -1.95678800 |
| C | 8.80548000  | -1.15313100 | -2.00358200 |
| H | 8.32364500  | -1.96787100 | -2.55766800 |
| H | 9.71515600  | -0.85327900 | -2.52664600 |
| H | 9.06648000  | -1.50227200 | -0.99712800 |
| C | 2.92688900  | -0.01140900 | 0.60875100  |
| C | 2.86853500  | 0.89848500  | 1.87511700  |
| H | 3.41838500  | 1.82137200  | 1.67670700  |
| H | 3.39149700  | 0.35470600  | 2.66869900  |
| C | 1.47585600  | 1.25804800  | 2.26457900  |
| C | 0.47996100  | 0.43382800  | 2.79643400  |
| C | -0.29342400 | 2.48849200  | 2.47995300  |
| N | 0.96826400  | 2.53252100  | 2.09265200  |
| N | -0.64091000 | 1.22714000  | 2.92446700  |
| C | -1.27148700 | 3.60697000  | 2.41239600  |
| H | -2.10834600 | 3.35888600  | 1.74856200  |
| H | -1.69319300 | 3.84302400  | 3.39604100  |
| H | -0.77130900 | 4.49373400  | 2.01957100  |
| C | -1.94114700 | 0.81715300  | 3.43621700  |
| H | -2.71777900 | 1.02154800  | 2.69592300  |
| H | -1.92058600 | -0.25252600 | 3.63915000  |
| H | -2.17093100 | 1.35468100  | 4.35987600  |
| O | 0.55199800  | -0.83159800 | 3.18524600  |
| C | -0.40932800 | 1.03255000  | -0.35993100 |
| C | -0.25367800 | 2.30630800  | -0.93852200 |
| C | -1.37352900 | 3.08218000  | -1.20325800 |
| C | -2.66837800 | 2.60951300  | -0.86353100 |
| C | -2.81573700 | 1.32377400  | -0.27745400 |
| C | -1.69503400 | 0.54543100  | -0.03475200 |
| H | 0.72882300  | 2.69349700  | -1.17802500 |
| H | -1.78576200 | -0.41200000 | 0.46072900  |
| O | -4.07685000 | 0.96456200  | 0.08257200  |
| O | -3.70146400 | 3.46234600  | -1.04390200 |
| O | -1.16443200 | 4.32272900  | -1.72729600 |
| C | -4.30278000 | -0.41300500 | 0.42103800  |
| H | -5.37622800 | -0.49984300 | 0.59387700  |
| H | -4.00639000 | -1.06772600 | -0.40375100 |

|   |             |             |             |
|---|-------------|-------------|-------------|
| H | -3.76479800 | -0.70344600 | 1.32945000  |
| C | -4.91441300 | 2.99496300  | -1.67357200 |
| H | -4.68852600 | 2.28647400  | -2.47616100 |
| H | -5.58045000 | 2.52921600  | -0.94648300 |
| H | -5.38401300 | 3.88552700  | -2.09552000 |
| C | -1.96275300 | 4.73750000  | -2.85135600 |
| H | -1.34854500 | 5.45144700  | -3.40565300 |
| H | -2.20281900 | 3.89008100  | -3.50296200 |
| H | -2.88651400 | 5.22046600  | -2.52619700 |
| C | 0.69270800  | 0.23207800  | 0.03422400  |
| O | 1.92057900  | 0.53146800  | -0.31576400 |
| H | 2.60869300  | -1.02473600 | 0.87460800  |
| H | 0.52718000  | -0.74884300 | 0.47574600  |
| H | -0.18438400 | -1.38681400 | 2.75225300  |
| C | -4.08467500 | -3.83158900 | -1.23254600 |
| C | -3.17704800 | -3.88876700 | -0.17746100 |
| C | -1.94340300 | -3.24395800 | -0.29767800 |
| C | -1.61709200 | -2.55107300 | -1.46317900 |
| C | -2.53610400 | -2.49958500 | -2.51194900 |
| C | -3.78066700 | -3.13719700 | -2.41514400 |
| H | -5.04361500 | -4.33510700 | -1.14080200 |
| H | -3.41532300 | -4.43558700 | 0.72891900  |
| H | -0.65418900 | -2.05926500 | -1.54595200 |
| H | -2.28079000 | -1.95829100 | -3.41909100 |
| S | -0.80514200 | -3.24471000 | 1.09268800  |
| O | 0.54242800  | -2.93593600 | 0.53903600  |
| O | -1.30670100 | -2.09350400 | 1.96379800  |
| O | -0.94225400 | -4.55614700 | 1.76109800  |
| C | -4.75945200 | -3.11292300 | -3.56252800 |
| H | -4.71085700 | -4.04922400 | -4.13240600 |
| H | -5.78939500 | -3.00537800 | -3.20722800 |
| H | -4.54649100 | -2.29365900 | -4.25517700 |

### TSA3

|   |            |            |             |
|---|------------|------------|-------------|
| C | 4.99515600 | 0.72172100 | -0.40837100 |
| C |            | 4.40231400 | -0.52980400 |
| C |            | 5.12503300 | -1.68242600 |
| C |            | 6.41743900 | -1.61074000 |
| C |            | 6.99575000 | -0.35707200 |
| C |            | 6.27161300 | 0.81112100  |
| H |            | 4.44304300 | 1.62883600  |
| H |            | 4.67850400 | -2.65819400 |
| H |            | 6.95265600 | -2.52494500 |
| H |            | 6.73490000 | 1.77335700  |

|   |             |             |             |
|---|-------------|-------------|-------------|
| O | 8.24200100  | -0.16113700 | -1.75191600 |
| C | 9.02310800  | -1.30696400 | -2.09164900 |
| H | 8.53483200  | -1.91232900 | -2.86502000 |
| H | 9.96681400  | -0.92073100 | -2.48070700 |
| H | 9.22491400  | -1.93269900 | -1.21358900 |
| C | 3.02964100  | -0.62281500 | 0.42933200  |
| C | 2.90215800  | -0.06252900 | 1.88303100  |
| H | 3.60803000  | 0.75936200  | 2.01882600  |
| H | 3.15957400  | -0.85791200 | 2.58706400  |
| C | 1.52201500  | 0.47250900  | 2.12080000  |
| C | 0.40801000  | -0.21261200 | 2.70390300  |
| C | 0.10341100  | 1.98995900  | 2.74265600  |
| N | 1.30696200  | 1.85175800  | 2.26321500  |
| N | -0.49527600 | 0.75073400  | 3.02361800  |
| C | -0.63278900 | 3.26623000  | 2.92948300  |
| H | -1.49184000 | 3.31125700  | 2.24877800  |
| H | -1.01047600 | 3.37307100  | 3.95168500  |
| H | 0.03472500  | 4.09821000  | 2.70118500  |
| C | -1.83867400 | 0.55090900  | 3.55407300  |
| H | -2.57567100 | 0.94777500  | 2.85345800  |
| H | -2.01265700 | -0.51512000 | 3.69172900  |
| H | -1.93595000 | 1.05989600  | 4.51535400  |
| O | 0.23722700  | -1.49021900 | 2.83582100  |
| C | -0.13117700 | 1.04935800  | -0.21371400 |
| C | 0.22786000  | 2.32103700  | -0.67319800 |
| C | -0.75141800 | 3.29423000  | -0.87323200 |
| C | -2.10283700 | 3.00984400  | -0.57813000 |
| C | -2.45722600 | 1.71939100  | -0.11492500 |
| C | -1.47907800 | 0.74198700  | 0.05069400  |
| H | 1.26423200  | 2.57102900  | -0.86399800 |
| H | -1.73829100 | -0.23787400 | 0.43164600  |
| O | -3.76935400 | 1.54462300  | 0.20622700  |
| O | -3.02914700 | 4.01269700  | -0.65584500 |
| O | -0.31255500 | 4.52109400  | -1.27769000 |
| C | -4.24288300 | 0.20003700  | 0.37216300  |
| H | -5.31862900 | 0.28435200  | 0.53349700  |
| H | -4.05027900 | -0.38765100 | -0.52810000 |
| H | -3.78608100 | -0.29421900 | 1.23569500  |
| C | -4.07967100 | 3.84734000  | -1.62819800 |
| H | -3.66102100 | 3.71310200  | -2.63218600 |
| H | -4.72166100 | 2.99910400  | -1.38029200 |
| H | -4.66060100 | 4.77131700  | -1.59973200 |
| C | -1.04551100 | 5.22425800  | -2.29332900 |
| H | -0.33665100 | 5.92587500  | -2.73984100 |

|   |             |             |             |
|---|-------------|-------------|-------------|
| H | -1.40403600 | 4.53800600  | -3.06894000 |
| H | -1.88975900 | 5.77395500  | -1.87232600 |
| C | 0.86630700  | 0.06034500  | 0.14943600  |
| O | 2.10405300  | 0.17029400  | -0.36165500 |
| H | 2.67662400  | -1.66060600 | 0.41819800  |
| H | 0.52425900  | -0.96323400 | 0.32140900  |
| H | -0.69507900 | -1.84125300 | 2.43811800  |
| C | -5.00478800 | -2.96548100 | -1.42642000 |
| C | -4.09148900 | -3.29545600 | -0.42904100 |
| C | -2.75004000 | -2.93368100 | -0.58252700 |
| C | -2.32183100 | -2.25588500 | -1.72283600 |
| C | -3.24861000 | -1.93403800 | -2.71627300 |
| C | -4.59972300 | -2.28206400 | -2.58563500 |
| H | -6.04857000 | -3.24499300 | -1.30923400 |
| H | -4.41150300 | -3.83457700 | 0.45659000  |
| H | -1.27737600 | -1.98536200 | -1.82885500 |
| H | -2.91540300 | -1.40543300 | -3.60530700 |
| S | -1.57902200 | -3.31517200 | 0.72097900  |
| O | -0.22050600 | -3.14755800 | 0.14825300  |
| O | -1.85656400 | -2.22729200 | 1.77895100  |
| O | -1.91657400 | -4.66025200 | 1.22889600  |
| C | -5.59818600 | -1.95842500 | -3.66862100 |
| H | -5.86538500 | -2.86010400 | -4.23342200 |
| H | -6.52592600 | -1.55727000 | -3.24697500 |
| H | -5.19964600 | -1.22840700 | -4.37866500 |

### 3aa

|   |             |             |             |
|---|-------------|-------------|-------------|
| O | 0.41180400  | -1.40504000 | -1.60673800 |
| O | -2.27463900 | -0.49882400 | 1.72186400  |
| O | 6.31420300  | -0.37725500 | 0.58513000  |
| O | 1.15497500  | 3.19627800  | 0.50387400  |
| O | -1.15934800 | 4.52775600  | 0.15332900  |
| O | -3.35484300 | 3.29306800  | -0.74743400 |
| N | -3.36505400 | -2.34431700 | 0.82847300  |
| N | -1.81316800 | -3.20097800 | -0.58274200 |
| C | -1.26485200 | -1.95356200 | -0.02930000 |
| C | -2.32020400 | -1.44737500 | 0.95655500  |
| C | -2.98569100 | -3.34969900 | -0.07309800 |
| C | -0.89790700 | -0.98992100 | -1.21146200 |
| H | -1.58246200 | -1.19174600 | -2.04204500 |
| C | 0.10700600  | -2.16281500 | 0.61930400  |
| H | 0.14058600  | -3.07142200 | 1.22278100  |
| H | 0.33199300  | -1.30187200 | 1.25498000  |
| C | 1.04813500  | -2.21165200 | -0.59423800 |

|   |             |             |             |
|---|-------------|-------------|-------------|
| H | 1.08913900  | -3.24183300 | -0.97530700 |
| C | 2.45605200  | -1.71612500 | -0.32046100 |
| C | 3.14302300  | -2.12589000 | 0.83409200  |
| H | 2.66789200  | -2.80552300 | 1.53615700  |
| C | 4.42671700  | -1.66778600 | 1.10579200  |
| H | 4.95373800  | -1.97648300 | 2.00324500  |
| C | 5.06319200  | -0.78146700 | 0.22202000  |
| C | 4.39843300  | -0.37663400 | -0.94164500 |
| H | 4.86508200  | 0.30173400  | -1.64562500 |
| C | 3.10811300  | -0.85047400 | -1.20149600 |
| H | 2.59200200  | -0.52081500 | -2.09598600 |
| C | -0.94687500 | 0.48808400  | -0.86983100 |
| C | 0.18362600  | 1.13274200  | -0.36819900 |
| H | 1.10769200  | 0.58375600  | -0.26981800 |
| C | 0.11144600  | 2.48196600  | -0.00528700 |
| C | -1.09340000 | 3.18923900  | -0.15633800 |
| C | -2.22973500 | 2.52861100  | -0.65778500 |
| C | -2.14964700 | 1.18110900  | -1.03179100 |
| H | -3.01709500 | 0.66153500  | -1.42205800 |
| C | -3.92105300 | -4.47300300 | -0.36717000 |
| H | -3.45249800 | -5.16347600 | -1.06966300 |
| H | -4.85267400 | -4.09390700 | -0.80158900 |
| H | -4.18214100 | -5.01157200 | 0.55022900  |
| C | 6.99535200  | 0.54563100  | -0.26302200 |
| H | 7.95855900  | 0.73748600  | 0.21315200  |
| H | 6.44489400  | 1.49043300  | -0.35621200 |
| H | 7.16597900  | 0.12706700  | -1.26267100 |
| C | 2.40920600  | 2.52820100  | 0.64919800  |
| H | 2.34001400  | 1.67464000  | 1.33471800  |
| H | 3.09442900  | 3.26827500  | 1.06681100  |
| H | 2.79570500  | 2.18218500  | -0.31641600 |
| C | -1.38651600 | 4.78162400  | 1.54559900  |
| H | -0.58410500 | 4.35841600  | 2.16148100  |
| H | -2.34995100 | 4.36954200  | 1.87143800  |
| H | -1.39983500 | 5.86769200  | 1.66857800  |
| C | -4.54852200 | 2.67230900  | -1.21813400 |
| H | -4.85299200 | 1.83838700  | -0.57275900 |
| H | -4.43984700 | 2.31113100  | -2.24861900 |
| H | -5.31856800 | 3.44567800  | -1.19144800 |
| C | -4.59105500 | -2.28176400 | 1.60445800  |
| H | -5.46448600 | -2.28277500 | 0.94729900  |
| H | -4.56962000 | -1.35097600 | 2.17361000  |
| H | -4.66015300 | -3.12445900 | 2.29885600  |

3'aa

|   |            |             |             |             |
|---|------------|-------------|-------------|-------------|
| C | 3.32849800 | 0.19371500  | 0.47133400  |             |
| C |            | 3.39677600  | -0.27020600 | -0.85441900 |
| C |            | 4.59115700  | -0.10524400 | -1.55495700 |
| C |            | 5.70975000  | 0.49583100  | -0.96564100 |
| C |            | 5.62741400  | 0.95046200  | 0.35534700  |
| C |            | 4.42609800  | 0.79531600  | 1.06976100  |
| H |            | 2.40484100  | 0.06799500  | 1.02874900  |
| H |            | 4.66173100  | -0.44956600 | -2.58399700 |
| H |            | 6.62104900  | 0.60623200  | -1.54096700 |
| H |            | 4.38151400  | 1.15545700  | 2.09304600  |
| O |            | 6.64445600  | 1.55086200  | 1.03670400  |
| C |            | 7.88720800  | 1.74349100  | 0.36329400  |
| H |            | 7.77461000  | 2.39309800  | -0.51364700 |
| H |            | 8.54846900  | 2.22679500  | 1.08472300  |
| H |            | 8.33103900  | 0.78945800  | 0.05225400  |
| C |            | 2.20200200  | -0.92938600 | -1.49856500 |
| C |            | 1.67669500  | -2.21493100 | -0.78597400 |
| H |            | 2.32916900  | -2.54244100 | 0.02440500  |
| H |            | 1.57088800  | -3.03203200 | -1.50447100 |
| C |            | 0.28579300  | -1.82603500 | -0.26116700 |
| C |            | -0.74063100 | -2.95355800 | -0.25577300 |
| C |            | -0.55378700 | -1.98746800 | 1.77827400  |
| N |            | 0.31334900  | -1.31266100 | 1.10970600  |
| N |            | -1.22546000 | -2.97350800 | 1.03429600  |
| C |            | -0.88063900 | -1.79167100 | 3.21876900  |
| H |            | -1.93425800 | -1.51668800 | 3.33845300  |
| H |            | -0.71390800 | -2.71389600 | 3.78575000  |
| H |            | -0.25487600 | -0.99691400 | 3.62687600  |
| C |            | -2.28105000 | -3.85536500 | 1.49935800  |
| H |            | -3.14861000 | -3.27900600 | 1.83316100  |
| H |            | -2.57078600 | -4.48771100 | 0.65840200  |
| H |            | -1.93032600 | -4.48711100 | 2.31992600  |
| O |            | -1.10032400 | -3.66306200 | -1.18513900 |
| C |            | -1.23092500 | 0.17939500  | -0.85210400 |
| C |            | -0.98401100 | 1.41366400  | -0.26485400 |
| C |            | -2.04853700 | 2.20659400  | 0.18619100  |
| C |            | -3.37035500 | 1.74274100  | 0.08195700  |
| C |            | -3.60877800 | 0.47715500  | -0.50449000 |
| C |            | -2.54608500 | -0.28841800 | -0.98675800 |
| H |            | 0.02737400  | 1.78566900  | -0.15976200 |
| H |            | -2.72437900 | -1.25086500 | -1.45066000 |
| O |            | -4.91382800 | 0.08190100  | -0.53214200 |
| O |            | -4.40162600 | 2.47582700  | 0.62178500  |
| O |            | -1.70464500 | 3.38955400  | 0.78190300  |

|   |             |             |             |
|---|-------------|-------------|-------------|
| C | -5.21836400 | -1.19645800 | -1.08889800 |
| H | -6.29846200 | -1.31549400 | -0.98827900 |
| H | -4.94663200 | -1.24962100 | -2.15011900 |
| H | -4.71400600 | -2.00439100 | -0.54427300 |
| C | -5.34369800 | 3.01663500  | -0.31937400 |
| H | -4.83928200 | 3.64228600  | -1.06564300 |
| H | -5.90108000 | 2.22410500  | -0.82632900 |
| H | -6.03325000 | 3.63431800  | 0.26065800  |
| C | -2.45126000 | 4.57093900  | 0.46142200  |
| H | -1.80177800 | 5.41291200  | 0.71513100  |
| H | -2.68427100 | 4.61349600  | -0.60897400 |
| H | -3.37621100 | 4.63632400  | 1.03870000  |
| C | -0.10615000 | -0.72013800 | -1.29464700 |
| O | 1.09559300  | 0.00088000  | -1.49376300 |
| H | 2.44599300  | -1.17515000 | -2.54046400 |
| H | -0.39953900 | -1.25413100 | -2.21396700 |

## TSB1

|   |            |             |             |
|---|------------|-------------|-------------|
| C | 3.04002800 | -3.17970200 | -0.24481200 |
| C | 1.90957600 | -2.34113600 | -0.13815400 |
| C | 1.37507300 | -2.08521500 | 1.13733600  |
| C | 1.94319600 | -2.63436700 | 2.28093600  |
| C | 3.06392800 | -3.47197400 | 2.15713300  |
| C | 3.60797000 | -3.73827400 | 0.88393800  |
| H | 3.47630600 | -3.38468400 | -1.21534000 |
| H | 0.52382800 | -1.41933200 | 1.24055900  |
| H | 1.52215300 | -2.40059900 | 3.25066200  |
| H | 4.47859400 | -4.38230000 | 0.81766800  |
| O | 3.69492100 | -4.06683400 | 3.19333800  |
| C | 3.19549800 | -3.85349800 | 4.51848900  |
| H | 2.16390600 | -4.21048300 | 4.61777100  |
| H | 3.84388600 | -4.43486600 | 5.17546000  |
| H | 3.24745500 | -2.79547200 | 4.79872700  |
| C | 1.26393400 | -1.74240800 | -1.29819400 |
| C | 2.02207100 | -1.41155200 | -2.55778800 |
| H | 2.58175100 | -2.27587600 | -2.92247800 |
| H | 1.30833100 | -1.11200400 | -3.33056200 |
| C | 2.95541600 | -0.28440900 | -2.22116300 |
| C | 2.64509400 | 1.05519100  | -2.13370900 |
| C | 4.73914400 | 0.70935600  | -1.50240700 |
| N | 4.26408100 | -0.48492000 | -1.81291900 |
| N | 3.79218800 | 1.68699500  | -1.69412600 |
| C | 6.11692900 | 1.00089400  | -1.00858000 |
| H | 6.09948200 | 1.47961000  | -0.02236100 |

|   |             |             |             |
|---|-------------|-------------|-------------|
| H | 6.66853700  | 0.06212600  | -0.92541500 |
| H | 6.66584200  | 1.66599600  | -1.68627300 |
| C | 3.86977000  | 3.08745400  | -1.31503400 |
| H | 4.89465500  | 3.44440700  | -1.42754900 |
| H | 3.21741900  | 3.66806000  | -1.96890500 |
| H | 3.54008000  | 3.21296700  | -0.27983900 |
| O | 1.52246900  | 1.74481500  | -2.40609300 |
| C | -2.02560800 | -2.64107400 | -1.18411400 |
| C | -3.12167200 | -3.35405600 | -0.65505000 |
| C | -4.25763300 | -2.69140600 | -0.20550600 |
| C | -4.32658300 | -1.28224600 | -0.31830800 |
| C | -3.23110800 | -0.56945700 | -0.86893700 |
| C | -2.09288700 | -1.23698000 | -1.29552900 |
| H | -3.09792500 | -4.43686600 | -0.58699200 |
| H | -1.29221500 | -0.64181700 | -1.70963700 |
| O | -3.28151300 | 0.78995200  | -1.00108900 |
| O | -5.42593100 | -0.64750300 | 0.16129200  |
| O | -5.23976100 | -3.45410200 | 0.34785600  |
| C | -3.23494500 | 1.52586900  | 0.24212900  |
| H | -4.19486400 | 1.47483200  | 0.76663600  |
| H | -2.43972900 | 1.14088900  | 0.88349200  |
| H | -3.01776400 | 2.55895900  | -0.03024500 |
| C | -6.19341300 | 0.14873500  | -0.77136100 |
| H | -6.60343400 | -0.49246800 | -1.55889400 |
| H | -7.00765000 | 0.57981600  | -0.18802900 |
| H | -5.58825300 | 0.94026000  | -1.21650500 |
| C | -6.60525500 | -3.22395200 | -0.04688100 |
| H | -7.13299000 | -4.15795700 | 0.15923600  |
| H | -7.05625500 | -2.41166200 | 0.52596800  |
| H | -6.67343200 | -3.00370100 | -1.11810900 |
| C | -0.91450900 | -3.44612300 | -1.62176200 |
| O | 0.26515100  | -3.12199800 | -1.90429100 |
| H | -1.12469700 | -4.51806600 | -1.73767600 |
| H | 0.51191500  | -1.00602600 | -1.03745800 |
| H | 0.85162800  | 1.52351500  | -1.68814500 |
| C | -0.45299500 | 5.42742100  | 0.05040100  |
| C | 0.03322100  | 4.12666700  | -0.03601600 |
| C | -0.21176700 | 3.23007500  | 1.01002400  |
| C | -0.93381800 | 3.63252300  | 2.13075500  |
| C | -1.41858200 | 4.94101300  | 2.20352100  |
| C | -1.18731900 | 5.85647000  | 1.16977700  |
| H | -0.26732800 | 6.12357700  | -0.76376800 |
| H | 0.58725100  | 3.80434800  | -0.91230100 |
| H | -1.12246800 | 2.92224500  | 2.92830900  |



|   |             |            |             |
|---|-------------|------------|-------------|
| H | -1.98721600 | 5.25152500 | 3.07622100  |
| C | -1.70604400 | 7.27130000 | 1.24186600  |
| H | -2.34294600 | 7.50361800 | 0.38056400  |
| H | -2.29052300 | 7.44008700 | 2.15051200  |
| H | -0.88148400 | 7.99408500 | 1.23280600  |
| S | 0.42952700  | 1.55328400 | 0.89295400  |
| O | -0.20666400 | 0.77780800 | 1.98969200  |
| O | 1.90830100  | 1.65704100 | 0.95841000  |
| O | -0.05302700 | 1.08023900 | -0.46837400 |

## INTB1

|   |             |             |             |
|---|-------------|-------------|-------------|
| O | 0.33701700  | -2.06059100 | -1.79988200 |
| O | -1.14194800 | 0.21032800  | 1.21182900  |
| O | -4.52215300 | -4.81918400 | 1.20968300  |
| O | 5.31181400  | -0.66151800 | -1.80947600 |
| O | 5.93458000  | -0.43719000 | 0.79791400  |
| O | 4.16705200  | -0.89057000 | 2.72144200  |
| N | 0.79685700  | 1.35850500  | 0.62929100  |
| N | 0.90479400  | 1.10232900  | -1.58248700 |
| C | -0.22452500 | 0.43812200  | -1.11730200 |
| C | -0.31895700 | 0.64249600  | 0.28150100  |
| C | 1.50696300  | 1.61284900  | -0.53192500 |
| C | 0.68404000  | -1.69011900 | -0.58062600 |
| H | -0.03387200 | -1.85642600 | 0.22146100  |
| C | -1.16602400 | -0.19810000 | -2.09129800 |
| H | -0.87484400 | 0.16812000  | -3.07786000 |
| H | -2.19848900 | 0.11553200  | -1.92314500 |
| C | -1.06534700 | -1.75431800 | -2.12052700 |
| H | -1.15850400 | -2.10905000 | -3.14859500 |
| C | -1.99930400 | -2.54644100 | -1.22362800 |
| C | -3.08201100 | -1.98221300 | -0.53667500 |
| H | -3.31124700 | -0.92837000 | -0.61568700 |
| C | -3.90354000 | -2.76712300 | 0.26514500  |
| H | -4.73654300 | -2.32259400 | 0.80019800  |
| C | -3.66430900 | -4.14154800 | 0.39956700  |
| C | -2.58791300 | -4.72390000 | -0.28789300 |
| H | -2.38019600 | -5.78423000 | -0.20889600 |
| C | -1.77507600 | -3.92387600 | -1.08925000 |
| H | -0.93997800 | -4.38277100 | -1.61155500 |
| C | 2.06093800  | -1.47684100 | -0.26101400 |
| C | 3.01218900  | -1.26415200 | -1.27668700 |
| H | 2.69927000  | -1.32018400 | -2.30950300 |
| C | 4.31703900  | -0.92983300 | -0.92659400 |
| C | 4.67741000  | -0.81469500 | 0.43729000  |

|   |             |             |             |
|---|-------------|-------------|-------------|
| C | 3.71548500  | -1.03166600 | 1.44977200  |
| C | 2.40481000  | -1.34924300 | 1.09933900  |
| H | 1.64232800  | -1.49741800 | 1.85356100  |
| C | 2.79489600  | 2.35312900  | -0.52056300 |
| H | 3.15628800  | 2.45918100  | -1.54458200 |
| H | 3.55003100  | 1.81093300  | 0.06238900  |
| H | 2.68220500  | 3.34863200  | -0.07624000 |
| C | -4.34055300 | -6.22634800 | 1.36506600  |
| H | -5.13280900 | -6.55767000 | 2.03854300  |
| H | -3.36701500 | -6.46166100 | 1.81267000  |
| H | -4.43806700 | -6.75397600 | 0.40839500  |
| C | 4.99774100  | -0.69418100 | -3.20502700 |
| H | 4.68459000  | -1.69586800 | -3.52215500 |
| H | 5.91935600  | -0.42273500 | -3.72162700 |
| H | 4.21383400  | 0.03093800  | -3.45307700 |
| C | 6.95091200  | -1.44346300 | 0.61971200  |
| H | 7.02786400  | -1.75013100 | -0.42751800 |
| H | 6.74122100  | -2.31626200 | 1.24890600  |
| H | 7.88945000  | -0.98490000 | 0.93668700  |
| C | 3.25133800  | -1.14207900 | 3.79036400  |
| H | 2.86280100  | -2.16687800 | 3.75306300  |
| H | 2.41562100  | -0.43236500 | 3.78108800  |
| H | 3.82547800  | -1.00738800 | 4.70821900  |
| C | 1.15696700  | 1.77420300  | 1.97639400  |
| H | 2.15323300  | 1.40435300  | 2.22753500  |
| H | 0.42652800  | 1.35807600  | 2.66927600  |
| H | 1.14036400  | 2.86376100  | 2.05023900  |
| H | -2.14231400 | 0.42438500  | 1.02486100  |
| C | -1.18576700 | 4.47299700  | 1.39619300  |
| C | -2.17343700 | 3.49400900  | 1.31933700  |
| C | -2.67975000 | 3.12411500  | 0.07009600  |
| C | -2.19893700 | 3.72497600  | -1.09333600 |
| C | -1.20896200 | 4.70428700  | -1.00234100 |
| C | -0.68925300 | 5.09539700  | 0.23939500  |
| H | -0.78885300 | 4.75711900  | 2.36735300  |
| H | -2.53503400 | 3.00432200  | 2.21741200  |
| H | -2.58470100 | 3.41043300  | -2.05692600 |
| H | -0.82666300 | 5.16299200  | -1.91033200 |
| S | -3.98481300 | 1.88813400  | -0.02449500 |
| O | -3.97122500 | 1.37534300  | -1.41998800 |
| O | -3.55024400 | 0.82780900  | 0.97983900  |
| O | -5.24868300 | 2.53260400  | 0.39491800  |
| C | 0.36836400  | 6.16653300  | 0.33838400  |
| H | -0.08572400 | 7.14600200  | 0.53482400  |

|   |            |            |             |
|---|------------|------------|-------------|
| H | 1.06608200 | 5.96437700 | 1.15742300  |
| H | 0.94151600 | 6.25161900 | -0.58957000 |

## TSB2

|   |             |             |             |
|---|-------------|-------------|-------------|
| O | 0.35307700  | -2.02557400 | -1.77877400 |
| O | -1.10924600 | 0.29837200  | 1.26060100  |
| O | -4.50184300 | -4.89899400 | 1.14463700  |
| O | 5.35075400  | -0.69291100 | -1.81710100 |
| O | 5.98039500  | -0.41138200 | 0.78409500  |
| O | 4.20193200  | -0.79303600 | 2.71841000  |
| N | 0.81760200  | 1.43549700  | 0.64950000  |
| N | 0.93924000  | 1.10703800  | -1.55589500 |
| C | -0.17571900 | 0.42369200  | -1.06541300 |
| C | -0.28882500 | 0.70423300  | 0.32897800  |
| C | 1.52996000  | 1.65689000  | -0.52572900 |
| C | 0.69238600  | -1.58594700 | -0.56910500 |
| H | -0.00719100 | -1.78500600 | 0.24281700  |
| C | -1.15841700 | -0.17551400 | -2.02574500 |
| H | -0.90417500 | 0.22057000  | -3.01087400 |
| H | -2.18157300 | 0.13524300  | -1.80901900 |
| C | -1.04485100 | -1.73040900 | -2.09483200 |
| H | -1.14169500 | -2.06319300 | -3.13029400 |
| C | -1.97229600 | -2.54919500 | -1.21066900 |
| C | -3.12874100 | -2.03290900 | -0.61144800 |
| H | -3.41192000 | -0.99652200 | -0.73593600 |
| C | -3.94945100 | -2.84235400 | 0.16732100  |
| H | -4.83823900 | -2.43404400 | 0.63769400  |
| C | -3.63705700 | -4.19406700 | 0.36448600  |
| C | -2.48589800 | -4.72822200 | -0.23426300 |
| H | -2.21741400 | -5.76942500 | -0.10282500 |
| C | -1.67439300 | -3.90482100 | -1.01356600 |
| H | -0.78222100 | -4.32726300 | -1.46730500 |
| C | 2.08255200  | -1.39893700 | -0.25110000 |
| C | 3.03724500  | -1.23062800 | -1.26933600 |
| H | 2.72308800  | -1.30553500 | -2.30064400 |
| C | 4.34995200  | -0.91521800 | -0.92684300 |
| C | 4.71373900  | -0.77328600 | 0.43284100  |
| C | 3.74891400  | -0.95033100 | 1.44805600  |
| C | 2.43053000  | -1.24955900 | 1.10392100  |
| H | 1.66709800  | -1.36694600 | 1.86262600  |
| C | 2.81500800  | 2.40152300  | -0.53247600 |
| H | 3.16886000  | 2.49452200  | -1.56026900 |
| H | 3.57371500  | 1.86495000  | 0.05105000  |
| H | 2.70404900  | 3.40128900  | -0.09839200 |

|   |             |             |             |
|---|-------------|-------------|-------------|
| C | -4.23699100 | -6.28324600 | 1.36942300  |
| H | -5.04663800 | -6.64354200 | 2.00643900  |
| H | -3.28033800 | -6.43297900 | 1.88526300  |
| H | -4.23745600 | -6.85232900 | 0.43157400  |
| C | 5.03773100  | -0.76360000 | -3.21093600 |
| H | 4.70078100  | -1.76713700 | -3.49666000 |
| H | 5.96622000  | -0.53189200 | -3.73469200 |
| H | 4.27187400  | -0.02826100 | -3.48427900 |
| C | 6.97267100  | -1.44459400 | 0.63668400  |
| H | 7.04550100  | -1.78170200 | -0.40170200 |
| H | 6.74276300  | -2.29622400 | 1.28789800  |
| H | 7.92147500  | -1.00028300 | 0.94384300  |
| C | 3.28386900  | -1.01979500 | 3.79025800  |
| H | 2.88346300  | -2.04046500 | 3.76682400  |
| H | 2.45586700  | -0.30128200 | 3.77240900  |
| H | 3.85944200  | -0.87956100 | 4.70648400  |
| C | 1.18017600  | 1.89663900  | 1.98175500  |
| H | 2.17294700  | 1.52630200  | 2.24557700  |
| H | 0.44581900  | 1.51337400  | 2.68912600  |
| H | 1.17445700  | 2.98819900  | 2.01368500  |
| H | -2.13160100 | 0.42604300  | 1.03857300  |
| C | -1.29207200 | 4.47997600  | 1.33466600  |
| C | -2.25794300 | 3.47755900  | 1.29324900  |
| C | -2.75932000 | 3.05629500  | 0.05802400  |
| C | -2.29579100 | 3.62965000  | -1.12600700 |
| C | -1.32765700 | 4.63317500  | -1.07006800 |
| C | -0.81387700 | 5.07638900  | 0.15640200  |
| H | -0.89945300 | 4.80435500  | 2.29476900  |
| H | -2.60680500 | 3.01198200  | 2.20907500  |
| H | -2.68027300 | 3.27835000  | -2.07721200 |
| H | -0.95980400 | 5.07176800  | -1.99376200 |
| S | -4.03335400 | 1.78652500  | 0.00818900  |
| O | -4.06637100 | 1.28418800  | -1.39053700 |
| O | -3.52552400 | 0.72674200  | 0.98172800  |
| O | -5.29362000 | 2.38830400  | 0.49336300  |
| C | 0.21382100  | 6.17882600  | 0.21510600  |
| H | -0.26889100 | 7.15239100  | 0.36787900  |
| H | 0.91321700  | 6.03200700  | 1.04434100  |
| H | 0.78884800  | 6.24113200  | -0.71352300 |

### 3bb

|   |             |             |             |
|---|-------------|-------------|-------------|
| O | -1.17857900 | -0.62978200 | -0.06788300 |
| O | 0.16076700  | 3.08022200  | 1.56004000  |
| O | -7.55045400 | -0.94893700 | 0.43149000  |

|   |             |             |             |
|---|-------------|-------------|-------------|
| O | 3.10149200  | -3.03332300 | -1.49555400 |
| O | 5.06013800  | -2.04613600 | 0.03974700  |
| O | 4.57915500  | -0.16482000 | 1.88885600  |
| N | 1.41072800  | 3.13975800  | -0.40249700 |
| N | 0.47668100  | 1.47297900  | -1.62284600 |
| C | -0.22569500 | 1.53094900  | -0.33919300 |
| C | 0.41981900  | 2.67556300  | 0.43558200  |
| C | 1.37786000  | 2.39016600  | -1.59184500 |
| C | -0.13655700 | 0.19225400  | 0.45933200  |
| H | -0.36080000 | 0.44405500  | 1.50644600  |
| C | -1.74309900 | 1.62525100  | -0.52391000 |
| H | -2.03241600 | 2.30775700  | -1.32530500 |
| H | -2.20076000 | 1.95501200  | 0.41398400  |
| C | -2.11870200 | 0.16285500  | -0.82629600 |
| H | -1.94890200 | -0.03658600 | -1.89270300 |
| C | -3.54190400 | -0.19228000 | -0.46822000 |
| C | -4.56036300 | -0.06714300 | -1.42421900 |
| H | -4.31098900 | 0.23298500  | -2.43917100 |
| C | -5.88667500 | -0.32116200 | -1.09461400 |
| H | -6.67756400 | -0.22609000 | -1.83214800 |
| C | -6.22452500 | -0.71912600 | 0.20831000  |
| C | -5.21576800 | -0.85939100 | 1.17145800  |
| H | -5.44880000 | -1.17374400 | 2.18189800  |
| C | -3.88893300 | -0.59225000 | 0.82408900  |
| H | -3.10736700 | -0.71078800 | 1.56790900  |
| C | 1.21398100  | -0.47889100 | 0.38777600  |
| C | 1.46322800  | -1.48474000 | -0.54517800 |
| H | 0.65341500  | -1.82394000 | -1.17582900 |
| C | 2.74874600  | -2.03350300 | -0.64017000 |
| C | 3.78500800  | -1.54984300 | 0.17809300  |
| C | 3.51702700  | -0.54391700 | 1.12345700  |
| C | 2.22729100  | -0.00934200 | 1.23057200  |
| H | 2.00360900  | 0.76291200  | 1.95695000  |
| C | 2.34852300  | 2.68940500  | -2.68161800 |
| H | 2.16996300  | 2.01693400  | -3.52161500 |
| H | 3.37589500  | 2.55518100  | -2.32604100 |
| H | 2.24891600  | 3.72675200  | -3.01882400 |
| C | -7.95478400 | -1.35236900 | 1.73856800  |
| H | -9.03906500 | -1.47037700 | 1.69512000  |
| H | -7.70528800 | -0.59436200 | 2.49144300  |
| H | -7.50091300 | -2.30931600 | 2.02490500  |
| C | 2.09829100  | -3.55182100 | -2.36765700 |
| H | 1.26576200  | -3.99691300 | -1.80893500 |
| H | 2.58905200  | -4.32839100 | -2.95742000 |

|   |             |              |              |
|---|-------------|--------------|--------------|
| H | 1. 70938600 | -2. 77912100 | -3. 04225100 |
| C | 5. 35125600 | -3. 13244100 | 0. 92756300  |
| H | 4. 67873700 | -3. 98097200 | 0. 75003900  |
| H | 5. 27266400 | -2. 81872200 | 1. 97573100  |
| H | 6. 37958200 | -3. 43982600 | 0. 72062500  |
| C | 4. 36997100 | 0. 85996400  | 2. 85865400  |
| H | 3. 63131200 | 0. 56057200  | 3. 61237600  |
| H | 4. 04825900 | 1. 79939100  | 2. 39160600  |
| H | 5. 33532000 | 1. 01332200  | 3. 34439600  |
| C | 2. 34897200 | 4. 19273400  | -0. 05709700 |
| H | 3. 37033100 | 3. 80315400  | -0. 01779600 |
| H | 2. 06899600 | 4. 56790200  | 0. 92865500  |
| H | 2. 30183900 | 5. 01072700  | -0. 78084100 |

## INTB2

|   |              |              |              |
|---|--------------|--------------|--------------|
| O | 1. 46275500  | -0. 74281800 | -0. 83535000 |
| O | -1. 12503700 | -0. 21379400 | 1. 37294400  |
| O | 7. 80415100  | -0. 99420800 | -0. 93987900 |
| O | -2. 91984800 | 1. 72570200  | -1. 89798100 |
| O | -2. 37696700 | 4. 30657300  | -1. 31586000 |
| O | -0. 01404000 | 5. 08570300  | -0. 41562700 |
| N | 0. 12833000  | 1. 32398100  | 2. 57667500  |
| N | 2. 16429000  | 0. 40707700  | 2. 60902400  |
| C | 1. 31710500  | -0. 41541600 | 1. 86533300  |
| C | 0. 02491300  | 0. 14839600  | 1. 88247200  |
| C | 1. 44473400  | 1. 43248900  | 3. 00186500  |
| C | 1. 55786600  | 0. 47768400  | -0. 37352100 |
| H | 2. 50502000  | 0. 81295400  | 0. 04331000  |
| C | 1. 68942100  | -1. 76765200 | 1. 35687000  |
| H | 0. 80720200  | -2. 40961000 | 1. 36835400  |
| H | 2. 44515900  | -2. 21560100 | 2. 00640300  |
| C | 2. 23397100  | -1. 76769700 | -0. 10865600 |
| H | 1. 91971600  | -2. 68292400 | -0. 60929900 |
| C | 3. 71931700  | -1. 57208300 | -0. 29552200 |
| C | 4. 53065500  | -0. 87538400 | 0. 61697000  |
| H | 4. 10150200  | -0. 46460600 | 1. 52586400  |
| C | 5. 88689900  | -0. 69895100 | 0. 37041000  |
| H | 6. 51721700  | -0. 16399500 | 1. 07376500  |
| C | 6. 47076400  | -1. 21742700 | -0. 79615500 |
| C | 5. 67498900  | -1. 91621400 | -1. 71585500 |
| H | 6. 09993000  | -2. 33313600 | -2. 62060300 |
| C | 4. 31524800  | -2. 08341500 | -1. 45483200 |
| H | 3. 70622200  | -2. 62765500 | -2. 17232100 |
| C | 0. 56990200  | 1. 44900100  | -0. 73467000 |

|   |             |             |             |
|---|-------------|-------------|-------------|
| C | -0.67336600 | 1.04446000  | -1.25770900 |
| H | -0.85361100 | -0.00607200 | -1.43939700 |
| C | -1.66556300 | 2.00080700  | -1.45935700 |
| C | -1.40724400 | 3.36146100  | -1.17333300 |
| C | -0.14972400 | 3.75715900  | -0.66099800 |
| C | 0.83728800  | 2.80076000  | -0.43340400 |
| H | 1.80697500  | 3.07704500  | -0.03944500 |
| C | 1.91764500  | 2.59516500  | 3.80220500  |
| H | 2.97667500  | 2.46565600  | 4.03150200  |
| H | 1.36005300  | 2.68378000  | 4.74165400  |
| H | 1.78773200  | 3.53652900  | 3.25542400  |
| C | 8.45892100  | -1.51418800 | -2.09823200 |
| H | 9.50706500  | -1.22553000 | -2.00401200 |
| H | 8.04936600  | -1.08401400 | -3.02027300 |
| H | 8.38878800  | -2.60773000 | -2.14317200 |
| C | -3.31234900 | 0.34828000  | -1.97971100 |
| H | -2.74716200 | -0.18799700 | -2.75057100 |
| H | -4.36809200 | 0.36048000  | -2.25064600 |
| H | -3.18452300 | -0.15296300 | -1.01666900 |
| C | -2.73121500 | 4.63149400  | -2.67369300 |
| H | -3.12229000 | 3.75836000  | -3.20384600 |
| H | -1.86519500 | 5.03514400  | -3.21130700 |
| H | -3.50651600 | 5.39758700  | -2.60950200 |
| C | 1.23053400  | 5.54366900  | 0.11381900  |
| H | 2.06262400  | 5.33056500  | -0.56831500 |
| H | 1.44176000  | 5.09704800  | 1.09391100  |
| H | 1.12581200  | 6.62357300  | 0.22775500  |
| C | -0.93818800 | 2.29814000  | 2.76078200  |
| H | -1.13250200 | 2.45321700  | 3.82471700  |
| H | -1.83810900 | 1.91470700  | 2.28111200  |
| H | -0.66688700 | 3.24866800  | 2.29520400  |
| H | -1.05530500 | -1.02689300 | 0.72561300  |
| C | -5.27599900 | -1.31196000 | 1.09487700  |
| C | -4.00799500 | -1.88998400 | 1.15970800  |
| C | -3.56062500 | -2.68391100 | 0.10204500  |
| C | -4.37339200 | -2.90343600 | -1.01187800 |
| C | -5.63946500 | -2.32306100 | -1.06180500 |
| C | -6.11031200 | -1.51764300 | -0.01299200 |
| H | -5.62297700 | -0.69214100 | 1.91744500  |
| H | -3.36785000 | -1.72048000 | 2.01888600  |
| H | -4.01250200 | -3.52530100 | -1.82418500 |
| H | -6.27412600 | -2.49677400 | -1.92733000 |
| S | -1.87668500 | -3.31403900 | 0.12559000  |
| O | -1.79564000 | -4.37854100 | -0.89751400 |

|   |             |             |             |
|---|-------------|-------------|-------------|
| O | -1.04109100 | -2.09696100 | -0.27474300 |
| O | -1.58856300 | -3.71583400 | 1.52341500  |
| C | -7.48597600 | -0.90259700 | -0.08451600 |
| H | -7.67111900 | -0.22928200 | 0.75686300  |
| H | -7.61688600 | -0.33313100 | -1.01161800 |
| H | -8.26285800 | -1.67650200 | -0.07293300 |

### TSB3

|   |             |             |             |
|---|-------------|-------------|-------------|
| O | -1.48328700 | 0.73609700  | -0.83453100 |
| O | 1.15313400  | 0.21466600  | 1.36161000  |
| O | -7.81869600 | 1.04406900  | -0.90966400 |
| O | 2.90605300  | -1.72993600 | -1.89010800 |
| O | 2.36580300  | -4.31355600 | -1.32356100 |
| O | -0.00686500 | -5.09901400 | -0.44138100 |
| N | -0.05542500 | -1.36260400 | 2.54989500  |
| N | -2.12578800 | -0.51845400 | 2.55896400  |
| C | -1.29924400 | 0.33105400  | 1.81382300  |
| C | 0.01894400  | -0.18572000 | 1.86228100  |
| C | -1.37772500 | -1.51726900 | 2.95627000  |
| C | -1.56900800 | -0.48227900 | -0.34717100 |
| H | -2.52885800 | -0.82885400 | 0.03033600  |
| C | -1.68972800 | 1.70490300  | 1.37463400  |
| H | -0.81479700 | 2.35552200  | 1.41259200  |
| H | -2.44513900 | 2.11090200  | 2.05101000  |
| C | -2.23735900 | 1.75443700  | -0.08829800 |
| H | -1.91558100 | 2.67855400  | -0.56761200 |
| C | -3.72649300 | 1.57938400  | -0.27085600 |
| C | -4.53732200 | 0.85997900  | 0.62434300  |
| H | -4.10631600 | 0.41886200  | 1.51804700  |
| C | -5.89598500 | 0.69850500  | 0.38054600  |
| H | -6.52547800 | 0.14572300  | 1.07071300  |
| C | -6.48300900 | 1.25523600  | -0.76662900 |
| C | -5.68798500 | 1.97663800  | -1.66922200 |
| H | -6.11509000 | 2.42249500  | -2.55905400 |
| C | -4.32570500 | 2.12796700  | -1.41096100 |
| H | -3.71719300 | 2.68887000  | -2.11589000 |
| C | -0.58292700 | -1.45787200 | -0.72401000 |
| C | 0.65927400  | -1.05217300 | -1.24545500 |
| H | 0.83967400  | -0.00113000 | -1.42332300 |
| C | 1.65153400  | -2.00824400 | -1.45240500 |
| C | 1.39295300  | -3.36979700 | -1.17536600 |
| C | 0.13368900  | -3.76765400 | -0.67213700 |
| C | -0.85253000 | -2.81064600 | -0.43592500 |
| H | -1.82317500 | -3.08934700 | -0.04637800 |



|   |             |             |             |
|---|-------------|-------------|-------------|
| C | -1.81859000 | -2.69899100 | 3.74649600  |
| H | -2.88901400 | -2.62043100 | 3.94313500  |
| H | -1.28586400 | -2.75791100 | 4.70248200  |
| H | -1.62497000 | -3.63330600 | 3.20693000  |
| C | -8.47620300 | 1.60353800  | -2.04775900 |
| H | -9.52595700 | 1.31990600  | -1.95612700 |
| H | -8.07522800 | 1.19852000  | -2.98488800 |
| H | -8.39816700 | 2.69746600  | -2.06041100 |
| C | 3.29681700  | -0.35198300 | -1.96577000 |
| H | 2.73114400  | 0.18738300  | -2.73416000 |
| H | 4.35261800  | -0.36145300 | -2.23701500 |
| H | 3.16885600  | 0.14564100  | -1.00057700 |
| C | 2.69754000  | -4.64404100 | -2.68476600 |
| H | 3.07913400  | -3.77231800 | -3.22482900 |
| H | 1.82384500  | -5.05048100 | -3.20796800 |
| H | 3.47497700  | -5.40902100 | -2.63142800 |
| C | -1.25554700 | -5.56035400 | 0.07474200  |
| H | -2.08325600 | -5.33683200 | -0.60939900 |
| H | -1.47242700 | -5.12616900 | 1.05921000  |
| H | -1.15424200 | -6.64196300 | 0.17536100  |
| C | 1.03426900  | -2.31256700 | 2.72667500  |
| H | 1.17458800  | -2.53256900 | 3.78718400  |
| H | 1.94453900  | -1.86785900 | 2.32592300  |
| H | 0.82189300  | -3.23676500 | 2.18348800  |
| H | 1.06680100  | 1.04201200  | 0.71707700  |
| C | 5.29682900  | 1.36719300  | 1.07576500  |
| C | 4.02265900  | 1.92883900  | 1.15957300  |
| C | 3.54777900  | 2.71254600  | 0.10645200  |
| C | 4.33845100  | 2.93786300  | -1.02215900 |
| C | 5.61097300  | 2.37382000  | -1.09080900 |
| C | 6.10978900  | 1.57914800  | -0.04662200 |
| H | 5.66570100  | 0.75559600  | 1.89488700  |
| H | 3.39963300  | 1.75622900  | 2.03059800  |
| H | 3.95668900  | 3.55227800  | -1.83059400 |
| H | 6.22876200  | 2.55264500  | -1.96741400 |
| S | 1.85784400  | 3.32315600  | 0.15711600  |
| O | 1.74960000  | 4.39763700  | -0.85191000 |
| O | 1.03037200  | 2.10008900  | -0.25122100 |
| O | 1.57925000  | 3.70041200  | 1.56313000  |
| C | 7.49294000  | 0.98381900  | -0.13671600 |
| H | 7.69479200  | 0.30472100  | 0.69616200  |
| H | 7.62372200  | 0.42608600  | -1.07084600 |
| H | 8.25899600  | 1.76853500  | -0.12340300 |

3'bb

|   |             |             |             |
|---|-------------|-------------|-------------|
| O | -0.99755400 | -0.62000100 | -1.37903300 |
| O | 1.39194000  | 1.74677500  | -2.40975600 |
| O | -6.61959800 | -1.08933600 | 1.48960600  |
| O | 3.87436500  | -2.11644400 | -1.72026700 |
| O | 4.89593100  | -1.80474500 | 0.74272400  |
| O | 3.44042600  | -0.78424400 | 2.74252000  |
| N | 1.43448900  | 2.94573400  | -0.41958500 |
| N | -0.54867300 | 2.38678700  | 0.51968900  |
| C | -0.40205300 | 1.58216400  | -0.69550400 |
| C | 0.90542100  | 2.05452700  | -1.33328200 |
| C | 0.51876700  | 3.10073300  | 0.62950600  |
| C | -0.36244100 | 0.04758900  | -0.30385300 |
| H | -0.97045100 | -0.02717300 | 0.60813600  |
| C | -1.58055800 | 1.64156400  | -1.69685300 |
| H | -1.19650800 | 1.92884300  | -2.67788100 |
| H | -2.32893200 | 2.37333600  | -1.39065800 |
| C | -2.12595300 | 0.19781700  | -1.77352000 |
| H | -2.34187800 | -0.08976800 | -2.80603100 |
| C | -3.34538700 | -0.10191000 | -0.92049500 |
| C | -3.62930200 | 0.57320600  | 0.27961100  |
| H | -2.98979700 | 1.38385100  | 0.61645200  |
| C | -4.72439600 | 0.21882600  | 1.05954500  |
| H | -4.94297500 | 0.73998500  | 1.98654200  |
| C | -5.57284300 | -0.82466600 | 0.65870800  |
| C | -5.30796900 | -1.50793000 | -0.53576700 |
| H | -5.94892400 | -2.31309500 | -0.87428900 |
| C | -4.20130400 | -1.13949500 | -1.30387100 |
| H | -4.00334400 | -1.67841300 | -2.22744100 |
| C | 1.00611600  | -0.51928400 | -0.02913000 |
| C | 1.75591100  | -1.09140800 | -1.05842900 |
| H | 1.32213200  | -1.16010300 | -2.04527600 |
| C | 3.05442000  | -1.54174700 | -0.79578300 |
| C | 3.60293100  | -1.40910200 | 0.49258200  |
| C | 2.83264100  | -0.84453000 | 1.52430600  |
| C | 1.53171900  | -0.39618800 | 1.26127900  |
| H | 0.92448900  | 0.03939200  | 2.04519600  |
| C | 0.82659200  | 4.02568700  | 1.75695600  |
| H | -0.00021000 | 4.02055700  | 2.46857300  |
| H | 0.98605900  | 5.04652800  | 1.39361600  |
| H | 1.74358300  | 3.71197700  | 2.26786000  |
| C | -7.49627300 | -2.16494900 | 1.15581600  |
| H | -8.24059700 | -2.20138300 | 1.95335700  |
| H | -6.96264800 | -3.12262200 | 1.11552300  |
| H | -8.00447200 | -1.99285500 | 0.19883900  |

|   |            |             |             |
|---|------------|-------------|-------------|
| C | 3.39723100 | -2.22001700 | -3.06153200 |
| H | 2.50562000 | -2.85575400 | -3.12737800 |
| H | 4.20745400 | -2.67904600 | -3.63090500 |
| H | 3.17017500 | -1.23372400 | -3.48437900 |
| C | 5.02299800 | -3.20454400 | 1.02215900  |
| H | 4.69981100 | -3.81101000 | 0.16757600  |
| H | 4.44148500 | -3.48602400 | 1.90921700  |
| H | 6.08277700 | -3.39114100 | 1.21445800  |
| C | 2.73144000 | -0.16432700 | 3.81285500  |
| H | 1.80596000 | -0.70171500 | 4.05492300  |
| H | 2.49174200 | 0.88239300  | 3.58621400  |
| H | 3.40060700 | -0.20005800 | 4.67452600  |
| C | 2.71706000 | 3.60926700  | -0.57133100 |
| H | 2.59503700 | 4.69477700  | -0.62182500 |
| H | 3.15721600 | 3.25366400  | -1.50432100 |
| H | 3.38318000 | 3.35721300  | 0.25846500  |

## TSC1

|   |             |             |             |
|---|-------------|-------------|-------------|
| C | 3.92248700  | 2.71688900  | -0.09680300 |
| C | 3.73620900  | 1.34971900  | -0.43132500 |
| C | 4.76692000  | 0.43210200  | -0.11161600 |
| C | 5.93943100  | 0.84019600  | 0.49873700  |
| C | 6.10444300  | 2.20266900  | 0.82103600  |
| C | 5.08475600  | 3.13116700  | 0.51732000  |
| H | 3.13270900  | 3.43048900  | -0.31844200 |
| H | 4.64201700  | -0.61800200 | -0.36004700 |
| H | 6.71282800  | 0.11641700  | 0.72102700  |
| H | 5.24268600  | 4.17229100  | 0.77879500  |
| O | 7.19467300  | 2.71458400  | 1.41390700  |
| C | 8.28617600  | 1.84458300  | 1.75118900  |
| H | 8.70161600  | 1.36833700  | 0.85678700  |
| H | 9.04121200  | 2.48555800  | 2.20691500  |
| H | 7.97341500  | 1.07969300  | 2.46978800  |
| C | 2.56825500  | 0.84848500  | -1.08301300 |
| C | 1.59053700  | 1.62745700  | -1.92556900 |
| H | 2.23311400  | 2.04354800  | -2.72088300 |
| H | 0.93144300  | 0.90332300  | -2.41109300 |
| C | 0.70639800  | 2.69620800  | -1.35661400 |
| C | -0.66794500 | 2.67672300  | -1.42130600 |
| C | 0.02236600  | 4.54945200  | -0.46286000 |
| N | 1.12064700  | 3.87450100  | -0.76373100 |
| N | -1.09791100 | 3.86812300  | -0.85917900 |
| C | -0.02460900 | 5.87433900  | 0.22280600  |
| H | -0.57048200 | 5.81994800  | 1.17215100  |

|   |             |             |             |
|---|-------------|-------------|-------------|
| H | 0.99671900  | 6.20012600  | 0.43091500  |
| H | -0.51356800 | 6.64023700  | -0.39101600 |
| C | -2.48619400 | 4.24259700  | -0.64590200 |
| H | -3.09662500 | 3.76444600  | -1.41310600 |
| H | -2.82444600 | 3.90141600  | 0.33507200  |
| H | -2.59215100 | 5.32581400  | -0.72901000 |
| O | -1.52767200 | 1.79037900  | -1.95697200 |
| C | 0.70702800  | -1.86124300 | 0.41823900  |
| C | -0.40098300 | -2.67179200 | 0.71142100  |
| C | -0.40794300 | -4.01917700 | 0.35353400  |
| C | 0.71713600  | -4.57991100 | -0.29130200 |
| C | 1.83500400  | -3.75884700 | -0.56690200 |
| C | 1.83157100  | -2.41706300 | -0.21411700 |
| H | -1.27103100 | -2.25529000 | 1.20855500  |
| H | 2.72391000  | -1.83867600 | -0.40658000 |
| O | 2.95510400  | -4.27456000 | -1.17453500 |
| O | 0.66681700  | -5.88416500 | -0.68717600 |
| O | -1.54517900 | -4.71954500 | 0.62440300  |
| C | 2.77964300  | -4.61014200 | -2.56421400 |
| H | 2.02001300  | -5.38646100 | -2.69796400 |
| H | 2.49752500  | -3.72170300 | -3.14200100 |
| H | 3.74625200  | -4.97937200 | -2.91232800 |
| C | 1.65669300  | -6.77510800 | -0.13000500 |
| H | 1.60408700  | -6.76640300 | 0.96423000  |
| H | 1.40153900  | -7.76949500 | -0.49924600 |
| H | 2.66560100  | -6.50489600 | -0.44945100 |
| C | -1.43241400 | -6.02054700 | 1.22623100  |
| H | -2.38260900 | -6.19375000 | 1.73710800  |
| H | -1.27070700 | -6.79816700 | 0.47673500  |
| H | -0.62174800 | -6.04533000 | 1.96342300  |
| C | 0.64673800  | -0.47113700 | 0.85736300  |
| O | 1.34270700  | 0.48904400  | 0.48942400  |
| H | -0.08450800 | -0.26294000 | 1.64893500  |
| H | 2.64893200  | -0.18584500 | -1.39434600 |
| H | -1.70895000 | 1.06099700  | -1.28517300 |
| C | -6.16452000 | 1.17218700  | -0.96812600 |
| C | -4.81702000 | 1.05542200  | -0.64055800 |
| C | -4.45478500 | 0.50023600  | 0.59173600  |
| C | -5.43181400 | 0.06480200  | 1.48456900  |
| C | -6.78040500 | 0.18709900  | 1.14219100  |
| C | -7.16823800 | 0.74147200  | -0.08386900 |
| H | -6.44656900 | 1.60112500  | -1.92653900 |
| H | -4.05199000 | 1.38642900  | -1.33549200 |
| H | -5.13520900 | -0.37140800 | 2.43244000  |

|   |             |             |             |
|---|-------------|-------------|-------------|
| H | -7.54113500 | -0.15596600 | 1.83861400  |
| C | -8.62298200 | 0.86606800  | -0.46407400 |
| H | -8.86196200 | 1.88523700  | -0.78791500 |
| H | -8.86938600 | 0.19941800  | -1.29947100 |
| H | -9.28063300 | 0.61193700  | 0.37189700  |
| S | -2.71709100 | 0.42246000  | 1.04956500  |
| O | -2.60231300 | -0.58155100 | 2.14096700  |
| O | -2.31326100 | 1.79972700  | 1.43365000  |
| O | -2.01203100 | -0.04769200 | -0.20806200 |

## INTC1

|   |             |             |             |
|---|-------------|-------------|-------------|
| C | 4.38505200  | -0.70044600 | -0.45568500 |
| C | 3.66270200  | 0.06121000  | 0.48002800  |
| C | 4.24226800  | 1.22710800  | 0.98618300  |
| C | 5.51103300  | 1.64727700  | 0.57677100  |
| C | 6.21352500  | 0.88897600  | -0.36766900 |
| C | 5.64025400  | -0.28945700 | -0.87801900 |
| H | 3.96402600  | -1.62880300 | -0.82742500 |
| H | 3.71061300  | 1.82095100  | 1.72578100  |
| H | 5.93062700  | 2.55479900  | 0.99282000  |
| H | 6.20472000  | -0.86966100 | -1.60111300 |
| O | 7.44639300  | 1.19968700  | -0.84945800 |
| C | 8.08478500  | 2.38462400  | -0.37185400 |
| H | 8.26193300  | 2.33958200  | 0.70967100  |
| H | 9.04331700  | 2.43661200  | -0.89101200 |
| H | 7.49864400  | 3.28107200  | -0.60842300 |
| C | 2.30647600  | -0.37768600 | 0.96407700  |
| C | 2.26204200  | -1.67576100 | 1.82177700  |
| H | 3.20358600  | -1.71912800 | 2.37880900  |
| H | 1.45285500  | -1.55920400 | 2.54910300  |
| C | 1.99986100  | -2.94339500 | 1.07521700  |
| C | 0.79005100  | -3.59582400 | 1.03363500  |
| C | 2.24962900  | -4.60800100 | -0.28971600 |
| N | 2.90152600  | -3.58482100 | 0.24189300  |
| N | 0.95363200  | -4.65813900 | 0.15752400  |
| C | 2.81792700  | -5.60363500 | -1.24591900 |
| H | 2.27820700  | -5.60928300 | -2.20060300 |
| H | 3.86146000  | -5.34879800 | -1.44335700 |
| H | 2.77971100  | -6.62418300 | -0.84618900 |
| C | -0.07620300 | -5.62436500 | -0.18805100 |
| H | -1.04824100 | -5.17583000 | 0.01843300  |
| H | -0.01772000 | -5.86219700 | -1.25229200 |
| H | 0.03886300  | -6.54671500 | 0.39109500  |
| O | -0.37005300 | -3.38203400 | 1.68237600  |

|   |             |             |             |
|---|-------------|-------------|-------------|
| C | 0.08567000  | 1.35496700  | -0.49378300 |
| C | -1.17767800 | 1.65641700  | -1.05698500 |
| C | -1.76838500 | 2.89376000  | -0.87311300 |
| C | -1.07136000 | 3.90532900  | -0.16110700 |
| C | 0.21894200  | 3.61705300  | 0.35826600  |
| C | 0.78548800  | 2.36496800  | 0.20474100  |
| H | -1.70499800 | 0.89971600  | -1.62753700 |
| H | 1.78207900  | 2.22024400  | 0.59378400  |
| O | 0.91421000  | 4.58588000  | 1.03800100  |
| O | -1.70513200 | 5.07658600  | 0.00971800  |
| O | -3.02868700 | 3.06358700  | -1.36197400 |
| C | 0.56910900  | 4.67031800  | 2.43436000  |
| H | -0.49640100 | 4.89016700  | 2.56996000  |
| H | 0.81293600  | 3.73441500  | 2.95107000  |
| H | 1.16572400  | 5.48430400  | 2.84980100  |
| C | -0.98834800 | 6.33066800  | -0.08333900 |
| H | -0.20016000 | 6.27265700  | -0.83757500 |
| H | -1.73874200 | 7.06182700  | -0.38821600 |
| H | -0.56268400 | 6.61740600  | 0.87896400  |
| C | -3.30768200 | 4.22428100  | -2.17042000 |
| H | -4.13913900 | 3.94025700  | -2.81923300 |
| H | -3.59587500 | 5.07751500  | -1.55306200 |
| H | -2.44433900 | 4.49183400  | -2.78886600 |
| C | 0.52208500  | 0.02191400  | -0.74175900 |
| O | 1.46891300  | -0.67340600 | -0.23544500 |
| H | -0.00967600 | -0.53540700 | -1.51063300 |
| H | 1.82023400  | 0.42175800  | 1.52089500  |
| H | -0.87014300 | -2.65843800 | 1.20537400  |
| C | -6.12907000 | -1.68671000 | 1.05601200  |
| C | -4.90524700 | -2.15431000 | 0.58299800  |
| C | -4.10006500 | -1.31614600 | -0.19313000 |
| C | -4.51691700 | -0.01873100 | -0.49291400 |
| C | -5.74413400 | 0.43751800  | -0.01056100 |
| C | -6.56900400 | -0.38485500 | 0.76845900  |
| H | -6.75661100 | -2.34180800 | 1.65526400  |
| H | -4.57575100 | -3.16476800 | 0.80092700  |
| H | -3.90344300 | 0.63361100  | -1.10270400 |
| H | -6.06316900 | 1.44925200  | -0.24754200 |
| C | -7.90619000 | 0.09737100  | 1.27329900  |
| H | -8.72685900 | -0.43577900 | 0.77792500  |
| H | -8.01239600 | -0.08210500 | 2.34888900  |
| H | -8.04457000 | 1.16657300  | 1.09019000  |
| S | -2.48674900 | -1.90179800 | -0.73609900 |
| O | -2.20232500 | -1.21610100 | -2.02913300 |

|   |             |             |             |
|---|-------------|-------------|-------------|
| 0 | -2.57697900 | -3.37964900 | -0.81490000 |
| 0 | -1.52339700 | -1.44074900 | 0.34430200  |

## TAC2

|   |              |             |             |
|---|--------------|-------------|-------------|
| C | -5.26550100  | -1.53218700 | 0.23423200  |
| C | -4.97317900  | -1.07989900 | -1.06373200 |
| C | -5.98065200  | -0.41468900 | -1.77419200 |
| C | -7.24428000  | -0.19574700 | -1.22653900 |
| C | -7.52017700  | -0.65571300 | 0.06969600  |
| C | -6.52075000  | -1.32394100 | 0.79350900  |
| H | -4.50763100  | -2.04136300 | 0.82057800  |
| H | -5.77659700  | -0.05777200 | -2.78055100 |
| H | -7.99752200  | 0.32023100  | -1.80954800 |
| H | -6.75049800  | -1.67366600 | 1.79505200  |
| O | -8.71239000  | -0.50895700 | 0.70593900  |
| C | -9.77364100  | 0.15606700  | 0.01901200  |
| H | -10.05572600 | -0.37497500 | -0.89829700 |
| H | -10.61995100 | 0.15681000  | 0.70791100  |
| H | -9.50852700  | 1.19153600  | -0.22677800 |
| C | -3.62358800  | -1.24106700 | -1.72522700 |
| C | -2.68136600  | -2.35854000 | -1.18716400 |
| H | -2.00787600  | -2.63271400 | -2.00262500 |
| H | -3.27288000  | -3.23892900 | -0.92520300 |
| C | -1.85347000  | -1.91032900 | -0.02562500 |
| C | -0.47162300  | -1.60512500 | -0.08533800 |
| C | -1.13228500  | -1.83996600 | 2.01969100  |
| N | -2.20271500  | -2.10188400 | 1.31511800  |
| N | -0.04114900  | -1.51738200 | 1.20892600  |
| C | -1.04694300  | -1.85089600 | 3.50661900  |
| H | -0.27224400  | -2.53847800 | 3.86233000  |
| H | -0.81177600  | -0.85570400 | 3.90153500  |
| H | -2.01130300  | -2.16562800 | 3.90864400  |
| C | 1.29268000   | -1.11293700 | 1.64670600  |
| H | 2.01209100   | -1.91291100 | 1.46237100  |
| H | 1.60934200   | -0.22343700 | 1.10158800  |
| H | 1.26020800   | -0.89002900 | 2.71221100  |
| O | 0.22685100   | -1.38612200 | -1.16023900 |
| C | -1.34781100  | 1.22760500  | -0.25088800 |
| C | -0.55493600  | 1.63180700  | -1.33203900 |
| C | 0.47460400   | 2.55691700  | -1.14492800 |
| C | 0.73044300   | 3.06489400  | 0.14716700  |
| C | -0.05702300  | 2.62249500  | 1.24323300  |
| C | -1.09327800  | 1.71614300  | 1.04893700  |
| H | -0.72493100  | 1.23416300  | -2.32413500 |

|   |             |             |             |
|---|-------------|-------------|-------------|
| H | -1.72255300 | 1.39868400  | 1.87028900  |
| O | 0.25271900  | 3.18831300  | 2.44199200  |
| O | 1.66134400  | 4.04720100  | 0.30736000  |
| O | 1.11841200  | 2.94690900  | -2.27421000 |
| C | -0.50853600 | 2.80293200  | 3.58565300  |
| H | -0.09361400 | 3.36582600  | 4.42301800  |
| H | -1.56888500 | 3.05686700  | 3.46878100  |
| H | -0.41113000 | 1.72895500  | 3.78961100  |
| C | 2.80916700  | 3.74942200  | 1.13345000  |
| H | 2.53996600  | 3.75014900  | 2.19235300  |
| H | 3.24006000  | 2.78479800  | 0.85451600  |
| H | 3.52762200  | 4.54779200  | 0.93599700  |
| C | 2.50953600  | 3.32131600  | -2.25111500 |
| H | 2.85177000  | 3.20107800  | -3.28152800 |
| H | 2.63135300  | 4.36218300  | -1.94256300 |
| H | 3.08330500  | 2.65923400  | -1.60296500 |
| C | -2.40661900 | 0.26739500  | -0.41629700 |
| O | -2.82364600 | -0.01208600 | -1.64006200 |
| H | -3.76662500 | -1.36159900 | -2.79978500 |
| H | -3.09816400 | 0.11735900  | 0.40969800  |
| H | 1.26817700  | -1.35865100 | -1.07019500 |
| C | 6.61204700  | -1.34829200 | 1.37105800  |
| C | 5.42279400  | -0.82692200 | 0.86392100  |
| C | 5.16863500  | -0.90508500 | -0.50645600 |
| C | 6.09692400  | -1.49214700 | -1.36763600 |
| C | 7.28152300  | -2.01073800 | -0.84694000 |
| C | 7.55631800  | -1.95275000 | 0.52754000  |
| H | 6.81397600  | -1.28109500 | 2.43704900  |
| H | 4.70207800  | -0.34814900 | 1.51845700  |
| H | 5.89713700  | -1.52716000 | -2.43347900 |
| H | 8.00729600  | -2.46261700 | -1.51798200 |
| S | 3.61401900  | -0.28697800 | -1.16075800 |
| O | 3.87689100  | 0.17712300  | -2.53994600 |
| O | 2.70397700  | -1.50969000 | -1.11847900 |
| O | 3.14702200  | 0.76233000  | -0.21326300 |
| C | 8.82510800  | -2.54584900 | 1.08788700  |
| H | 8.66973900  | -3.59315800 | 1.37685800  |
| H | 9.63451700  | -2.52813300 | 0.35190700  |
| H | 9.15838400  | -2.00819700 | 1.98081000  |

### 3cc

|   |            |             |             |
|---|------------|-------------|-------------|
| C | 3.70198600 | 0.58088000  | 0.15196400  |
| C | 3.45757600 | -0.33321100 | -0.88841800 |
| C | 4.37549100 | -1.37207000 | -1.07402900 |



|   |             |             |             |
|---|-------------|-------------|-------------|
| C | 5.50371300  | -1.51612300 | -0.26322200 |
| C | 5.72673900  | -0.59854500 | 0.77210600  |
| C | 4.81659800  | 0.45091300  | 0.97252400  |
| H | 3.01752900  | 1.40541200  | 0.32745500  |
| H | 4.21051700  | -2.09219500 | -1.87200200 |
| H | 6.19173500  | -2.33320400 | -0.44483900 |
| H | 5.00516300  | 1.15648800  | 1.77585300  |
| O | 6.78746300  | -0.63490800 | 1.62693900  |
| C | 7.76158200  | -1.66240300 | 1.45009100  |
| H | 8.23791200  | -1.60236300 | 0.46366000  |
| H | 8.51581300  | -1.49757100 | 2.22170900  |
| H | 7.32575300  | -2.66043200 | 1.58272100  |
| C | 2.22168500  | -0.27583300 | -1.76807000 |
| C | 1.61953100  | 1.12659000  | -2.00591900 |
| H | 1.19440500  | 1.16354600  | -3.01131400 |
| H | 2.34596700  | 1.93426800  | -1.90572100 |
| C | 0.47362900  | 1.26109700  | -0.97621400 |
| C | -0.86149500 | 1.58948300  | -1.64721900 |
| C | -0.41364400 | 3.02004600  | 0.04098600  |
| N | 0.65313100  | 2.29752000  | 0.04420100  |
| N | -1.36489700 | 2.65142300  | -0.91893700 |
| C | -0.67729700 | 4.16794400  | 0.95488500  |
| H | -0.83504400 | 5.09069200  | 0.38619500  |
| H | -1.58180300 | 3.99048400  | 1.54686100  |
| H | 0.17191600  | 4.30037700  | 1.62652200  |
| C | -2.67000600 | 3.24778900  | -1.13963600 |
| H | -3.07715100 | 2.81097600  | -2.05320300 |
| H | -3.34493000 | 3.02745900  | -0.30682200 |
| H | -2.58829400 | 4.33028400  | -1.26420300 |
| O | -1.38767600 | 1.06194700  | -2.61322100 |
| C | -0.90569600 | -0.68663400 | 0.07604200  |
| C | -1.58842000 | -1.56845200 | -0.75209300 |
| C | -2.89507100 | -1.96646800 | -0.43778100 |
| C | -3.52594500 | -1.47473400 | 0.71679100  |
| C | -2.82154600 | -0.57542200 | 1.55253800  |
| C | -1.51998100 | -0.18653000 | 1.23390900  |
| H | -1.13165800 | -1.94184800 | -1.65951900 |
| H | -0.97052800 | 0.48925100  | 1.87714800  |
| O | -3.49155200 | -0.17136400 | 2.67018300  |
| O | -4.76803400 | -1.94531800 | 1.07505600  |
| O | -3.46094500 | -2.87974300 | -1.28444300 |
| C | -2.84778700 | 0.75404000  | 3.54381000  |
| H | -3.56042100 | 0.95173400  | 4.34638700  |
| H | -1.92968600 | 0.33468800  | 3.97265100  |

|   |             |             |             |
|---|-------------|-------------|-------------|
| H | -2.61085900 | 1.69503400  | 3.03124500  |
| C | -5.83797800 | -0.98698600 | 1.04718700  |
| H | -5.69223100 | -0.20171700 | 1.79402500  |
| H | -5.93492900 | -0.53262900 | 0.05343600  |
| H | -6.74970800 | -1.54340500 | 1.27703000  |
| C | -4.82911100 | -2.71196100 | -1.67801700 |
| H | -4.94415400 | -3.28136000 | -2.60413700 |
| H | -5.51919000 | -3.09695500 | -0.92394200 |
| H | -5.05661000 | -1.65839900 | -1.87893600 |
| C | 0.46138900  | -0.16677700 | -0.28515700 |
| O | 1.12590600  | -1.02585400 | -1.19154000 |
| H | 2.44361700  | -0.77572800 | -2.71460400 |
| H | 1.05227000  | -0.04336600 | 0.63335500  |

## INTC2

|   |            |             |             |
|---|------------|-------------|-------------|
| C | 0.78621500 | 1.88084300  | 1.56265200  |
| C |            | 0.36598500  | 1.07031600  |
| C |            | 0.48567900  | -0.31298900 |
| C |            | 1.02243200  | -0.89804200 |
| C |            | 1.44571600  | -0.08229100 |
| C |            | 1.31169100  | 1.31332900  |
| H |            | 0.71797800  | 2.96024900  |
| H |            | 0.18063400  | -0.94431000 |
| H |            | 1.11814800  | -1.97481200 |
| H |            | 1.64372000  | 1.93364300  |
| O |            | 1.99583500  | -0.54366800 |
| C |            | 2.22445000  | -1.94954600 |
| H |            | 2.88626000  | -2.31329200 |
| H |            | 2.70530800  | -2.09787800 |
| H |            | 1.28333400  | -2.51264500 |
| C |            | -0.11896400 | 1.66134700  |
| C |            | 0.98326900  | 2.15915600  |
| H |            | 1.26117600  | 1.27846500  |
| H |            | 0.52282100  | 2.87071800  |
| C |            | 2.19456200  | 2.73985500  |
| C |            | 3.32699000  | 2.05783700  |
| C |            | 3.44865000  | 4.17182200  |
| N |            | 2.28825700  | 4.05912000  |
| N |            | 4.12840200  | 2.97128100  |
| C |            | 4.00166000  | 5.41146200  |
| H |            | 4.92979700  | 5.73866300  |
| H |            | 3.26504800  | 6.21206000  |
| H |            | 4.22317700  | 5.27372400  |
| C |            | 5.40876100  | 2.67472100  |

|   |             |             |             |
|---|-------------|-------------|-------------|
| H | 5.84458900  | 1.80346500  | 0.05906300  |
| H | 6.08452000  | 3.52411200  | 0.43197700  |
| H | 5.28921500  | 2.45711200  | 1.61657500  |
| O | 3.74348100  | 0.78561500  | -0.82592700 |
| C | -3.16822800 | 1.80497600  | -0.10896600 |
| C | -4.51135700 | 2.25126200  | 0.02885800  |
| C | -5.55150600 | 1.34971200  | 0.07619900  |
| C | -5.30423700 | -0.04958900 | -0.01971800 |
| C | -3.94916100 | -0.51029300 | -0.08796500 |
| C | -2.91533600 | 0.40544800  | -0.13146200 |
| H | -4.74631500 | 3.30947100  | 0.06779700  |
| H | -1.90781000 | 0.03287700  | -0.13117000 |
| O | -3.76838600 | -1.85140200 | -0.09509400 |
| O | -6.39682200 | -0.80547200 | -0.00597300 |
| O | -6.83696900 | 1.81057700  | 0.12933500  |
| C | -2.43247700 | -2.36497200 | -0.22784300 |
| H | -1.94751000 | -1.99319100 | -1.13733300 |
| H | -1.82693700 | -2.10680600 | 0.64750200  |
| H | -2.54668000 | -3.44766300 | -0.28436600 |
| C | -6.43398300 | -2.21024900 | -0.35675500 |
| H | -5.97269100 | -2.81576400 | 0.42316800  |
| H | -7.49756100 | -2.43733900 | -0.43428300 |
| H | -5.94063000 | -2.38305600 | -1.31392200 |
| C | -7.50714400 | 1.61521500  | 1.38978900  |
| H | -8.50197700 | 2.04874900  | 1.27316200  |
| H | -7.59948500 | 0.55313300  | 1.63540800  |
| H | -6.97433800 | 2.13515200  | 2.19494600  |
| C | -2.22144600 | 2.84512400  | -0.23094500 |
| O | -0.95986200 | 2.85758200  | -0.49368100 |
| H | -2.59421100 | 3.86185700  | -0.10836300 |
| H | -0.74337000 | 0.96374400  | -1.36199800 |
| H | 3.19745600  | 0.27734200  | -1.48525200 |
| C | 1.18299900  | -4.40998800 | 0.33184900  |
| C | 0.91165200  | -3.62540900 | -0.78574100 |
| C | 1.88720800  | -2.74700200 | -1.27117200 |
| C | 3.13110200  | -2.67174200 | -0.64785400 |
| C | 3.39384600  | -3.46667900 | 0.47071700  |
| C | 2.42723400  | -4.34078400 | 0.98235000  |
| H | 0.41945500  | -5.08476200 | 0.71121900  |
| H | -0.05690400 | -3.68178900 | -1.27202100 |
| H | 3.88178500  | -1.98502100 | -1.02142300 |
| H | 4.36289500  | -3.39606500 | 0.95765700  |
| C | 2.68929400  | -5.16467600 | 2.21843000  |
| H | 3.73407500  | -5.09571400 | 2.53333100  |

|   |            |             |             |
|---|------------|-------------|-------------|
| H | 2.06507700 | -4.82613300 | 3.05429100  |
| H | 2.45315100 | -6.22135100 | 2.05068700  |
| S | 1.50842300 | -1.71827500 | -2.70484300 |
| O | 0.14208800 | -1.17024800 | -2.44672300 |
| O | 1.58831200 | -2.59465200 | -3.89790700 |
| O | 2.57258100 | -0.64913100 | -2.70760200 |

### TSC3

### 3'cc

|   |            |             |             |
|---|------------|-------------|-------------|
| C | 3.71620700 | 0.53666900  | 0.29161000  |
| C |            | 3.47571700  | -0.18513800 |
| C |            | 4.40330400  | -1.16478800 |
| C |            | 5.53903000  | -1.43481400 |
| C |            | 5.75901100  | -0.70866600 |
| C |            | 4.83852900  | 0.27931000  |
| H |            | 3.02352200  | 1.30860300  |
| H |            | 4.23959800  | -1.73737900 |
| H |            | 6.23443500  | -2.19861800 |
| H |            | 5.02410600  | 0.83521500  |
| O |            | 6.82604100  | -0.87755800 |
| C |            | 7.76802100  | -1.90428900 |
| H |            | 8.26888600  | -1.72229000 |
| H |            | 8.51021000  | -1.87991400 |
| H |            | 7.29387000  | -2.89325500 |
| C |            | 2.22797700  | 0.00101800  |
| C |            | 1.65352900  | 1.44316300  |
| H |            | 1.43639300  | 1.74209900  |
| H |            | 2.34014100  | 2.17433300  |
| C |            | 0.32849200  | 1.38104600  |
| C |            | 0.16760400  | 2.44940000  |
| C |            | -1.58368200 | 2.43625800  |
| N |            | -0.84920400 | 1.51399300  |
| N |            | -1.05237000 | 3.02955200  |
| C |            | -2.90622100 | 2.88316100  |
| H |            | -3.69129600 | 2.69398300  |
| H |            | -2.90344300 | 3.95802900  |
| H |            | -3.13948900 | 2.33548000  |
| C |            | -1.66017900 | 4.07000200  |
| H |            | -0.99055000 | 4.26229000  |
| H |            | -1.78874000 | 4.99138800  |
| H |            | -2.63215700 | 3.74348600  |

|   |             |             |             |
|---|-------------|-------------|-------------|
| O | 0.91879800  | 2.71594400  | 1.02010400  |
| C | -0.92228000 | -0.65433100 | 0.01264800  |
| C | -1.53471400 | -1.55553100 | -0.84872800 |
| C | -2.81524100 | -2.04826200 | -0.56324900 |
| C | -3.49273200 | -1.62930000 | 0.59376600  |
| C | -2.86017400 | -0.70881600 | 1.46291000  |
| C | -1.58168600 | -0.22877400 | 1.17438000  |
| H | -1.04056400 | -1.87601800 | -1.75741500 |
| H | -1.08744400 | 0.46310200  | 1.84572700  |
| O | -3.57042000 | -0.37677400 | 2.57878000  |
| O | -4.70781300 | -2.18657900 | 0.91800500  |
| O | -3.31058100 | -2.97529300 | -1.43958200 |
| C | -3.00522300 | 0.57667000  | 3.47723300  |
| H | -3.74019000 | 0.71020100  | 4.27272700  |
| H | -2.06586600 | 0.21482000  | 3.91223600  |
| H | -2.82832900 | 1.54059400  | 2.98319900  |
| C | -5.83605300 | -1.29726200 | 0.89424800  |
| H | -5.76315400 | -0.53673900 | 1.67661500  |
| H | -5.93264700 | -0.80778100 | -0.08277100 |
| H | -6.71639200 | -1.91927700 | 1.07169400  |
| C | -4.67506100 | -2.86647700 | -1.86576400 |
| H | -4.74270100 | -3.43252700 | -2.79855700 |
| H | -5.36556500 | -3.28802000 | -1.13190600 |
| H | -4.94481500 | -1.82244800 | -2.06463800 |
| C | 0.41308300  | -0.03997500 | -0.31349700 |
| O | 1.14288100  | -0.82067200 | -1.24012900 |
| H | 2.43063500  | -0.37071400 | -2.74441900 |
| H | 0.98775600  | 0.09235800  | 0.61601600  |

## TSD1

|   |            |            |             |
|---|------------|------------|-------------|
| C | 2.17312800 | 4.30913600 | -1.09886800 |
| C | 2.19721800 | 2.96796400 | -0.61729900 |
| C | 3.14138300 | 2.62653500 | 0.39122900  |
| C | 4.02909900 | 3.55817300 | 0.89007500  |
| C | 3.99067500 | 4.87857000 | 0.39111600  |
| C | 3.05373300 | 5.24162300 | -0.60886800 |
| H | 1.45474900 | 4.60373900 | -1.85541800 |
| H | 3.15239200 | 1.60628400 | 0.76633600  |
| H | 4.74028700 | 3.27194600 | 1.65428800  |
| H | 3.05124700 | 6.26687100 | -0.96246100 |
| O | 4.79470600 | 5.86456100 | 0.79844400  |
| C | 5.77306200 | 5.60991500 | 1.82281200  |
| H | 6.49111700 | 4.85112000 | 1.49682100  |
| H | 6.28624900 | 6.55924500 | 1.97555500  |

|   |             |             |             |
|---|-------------|-------------|-------------|
| H | 5.29032400  | 5.29675400  | 2.75378500  |
| C | 1.32957900  | 1.95791400  | -1.07296900 |
| C | 0.48235100  | 2.02421300  | -2.30191200 |
| H | 0.15158400  | 3.04407800  | -2.50907600 |
| H | 1.20964000  | 1.76659600  | -3.09476900 |
| C | -0.69693400 | 1.10170600  | -2.38315700 |
| C | -0.73796300 | -0.26718700 | -2.56589100 |
| C | -2.79513600 | 0.55007300  | -2.37034800 |
| N | -1.98954600 | 1.59016600  | -2.25997200 |
| N | -2.08055300 | -0.61139100 | -2.54432200 |
| C | -4.28276200 | 0.57030700  | -2.27179800 |
| H | -4.63471400 | -0.02134400 | -1.41923100 |
| H | -4.61774900 | 1.59995300  | -2.13179200 |
| H | -4.76136400 | 0.16634000  | -3.17219700 |
| C | -2.60647200 | -1.96402800 | -2.60766300 |
| H | -3.28402700 | -2.07953900 | -3.45843300 |
| H | -1.76796100 | -2.65123600 | -2.72098400 |
| H | -3.14080800 | -2.20773000 | -1.68474800 |
| O | 0.17713700  | -1.20646500 | -2.84313400 |
| C | -2.10126000 | 0.45029600  | 0.92532900  |
| C | -2.38878000 | -0.91936000 | 0.95937800  |
| C | -3.69849100 | -1.36007200 | 1.16187900  |
| C | -4.72547500 | -0.41198900 | 1.36226300  |
| C | -4.41371000 | 0.97146200  | 1.34211800  |
| C | -3.11769500 | 1.40058600  | 1.10795300  |
| H | -1.60290500 | -1.65104200 | 0.79469300  |
| H | -2.89766600 | 2.46101400  | 1.06829400  |
| O | -5.40400600 | 1.90890600  | 1.51494200  |
| O | -5.99141500 | -0.84616700 | 1.64026800  |
| O | -3.88773400 | -2.71030900 | 1.18968700  |
| C | -5.93319200 | 1.99061600  | 2.85118700  |
| H | -6.39052700 | 1.04599200  | 3.16148600  |
| H | -5.14375400 | 2.26587700  | 3.56086300  |
| H | -6.69267800 | 2.77472700  | 2.83039400  |
| C | -7.01464900 | -0.50095600 | 0.68322200  |
| H | -6.84106900 | -1.02291600 | -0.26438300 |
| H | -7.95649500 | -0.84223900 | 1.11618100  |
| H | -7.05467700 | 0.57664200  | 0.51107100  |
| C | -5.03220800 | -3.27484000 | 0.53068800  |
| H | -4.77374600 | -4.31735100 | 0.33031300  |
| H | -5.92354200 | -3.23125700 | 1.15997800  |
| H | -5.23108400 | -2.76962000 | -0.42124600 |
| C | -0.73309500 | 0.84412500  | 0.61220700  |
| O | -0.35801200 | 2.01107700  | 0.44861700  |

|   |             |             |             |
|---|-------------|-------------|-------------|
| H | -0.02410100 | 0.01209600  | 0.52429900  |
| H | 1.52479100  | 0.96423000  | -0.68836200 |
| H | 0.96271300  | -1.16430200 | -2.22112000 |
| C | 4.50794700  | -4.84902100 | -0.45184400 |
| C | 3.55405400  | -3.85545800 | -0.64828400 |
| C | 3.36154900  | -2.88364500 | 0.33891900  |
| C | 4.11611900  | -2.90338500 | 1.50990100  |
| C | 5.07194800  | -3.90544300 | 1.69297500  |
| C | 5.28158100  | -4.89145600 | 0.72091400  |
| H | 4.66086000  | -5.60352800 | -1.21947000 |
| H | 2.97063600  | -3.82367000 | -1.56287900 |
| H | 3.95951700  | -2.13743200 | 2.26173500  |
| H | 5.66279700  | -3.91903800 | 2.60501600  |
| C | 6.31036600  | -5.97818200 | 0.91365500  |
| H | 5.84644100  | -6.97053700 | 0.87514500  |
| H | 7.06827700  | -5.94946900 | 0.12193000  |
| H | 6.82298600  | -5.88180400 | 1.87473900  |
| S | 2.08794800  | -1.63891400 | 0.10829700  |
| O | 2.36289100  | -0.55485600 | 1.09194900  |
| O | 0.77312700  | -2.30930300 | 0.30030000  |
| O | 2.27580200  | -1.16337300 | -1.31764300 |

## INTD1

|   |             |             |             |
|---|-------------|-------------|-------------|
| O | 0.21262800  | 1.36579100  | -0.85429200 |
| O | 0.25075600  | -2.71494100 | -0.51957800 |
| O | -5.16818500 | 4.78950200  | -0.62461900 |
| O | 4.81891700  | 2.74573300  | 1.09160400  |
| O | 6.49931900  | 0.84467700  | 0.20541600  |
| O | 5.69410100  | -1.14185100 | -1.36081300 |
| N | 1.92936200  | -2.13097000 | 0.95381600  |
| N | 1.20674400  | -0.22668900 | 1.86521700  |
| C | 0.27345600  | -0.64704600 | 0.92218500  |
| C | 0.71444000  | -1.87980100 | 0.37778300  |
| C | 2.18368200  | -1.10194700 | 1.85234700  |
| C | 1.09520700  | 0.40690500  | -1.06658900 |
| H | 0.78874700  | -0.41980400 | -1.70793000 |
| C | -1.01440800 | 0.08624900  | 0.76524100  |
| H | -1.06814200 | 0.82527000  | 1.56792400  |
| H | -1.88174800 | -0.57009300 | 0.85030900  |
| C | -1.12524400 | 0.82292500  | -0.60277100 |
| H | -1.33797100 | 0.08921000  | -1.38375100 |
| C | -2.14511800 | 1.91997400  | -0.62566300 |
| C | -3.35578900 | 1.72323400  | -1.30747700 |
| H | -3.52640100 | 0.79685700  | -1.85150900 |

|   |             |             |             |
|---|-------------|-------------|-------------|
| C | -4.34733100 | 2.69689300  | -1.27994500 |
| H | -5.28873100 | 2.55190200  | -1.80050000 |
| C | -4.13982100 | 3.89816100  | -0.58373700 |
| C | -2.92832800 | 4.10926500  | 0.09214800  |
| H | -2.74298400 | 5.02895000  | 0.63351400  |
| C | -1.94949200 | 3.11463500  | 0.07318500  |
| H | -1.01718100 | 3.27809700  | 0.60655500  |
| C | 2.48691600  | 0.61996300  | -0.82352000 |
| C | 2.92709000  | 1.68993400  | -0.02176000 |
| H | 2.20245100  | 2.39795600  | 0.35500500  |
| C | 4.27639400  | 1.78122600  | 0.30671300  |
| C | 5.18825600  | 0.80422500  | -0.16069900 |
| C | 4.73740800  | -0.26285200 | -0.96880300 |
| C | 3.38476700  | -0.36062300 | -1.28995000 |
| H | 3.00794200  | -1.17835100 | -1.89102400 |
| C | 3.45294400  | -1.01944700 | 2.62005800  |
| H | 3.65450200  | -1.94328700 | 3.17267400  |
| H | 3.39282600  | -0.18622700 | 3.32199400  |
| H | 4.30172600  | -0.84308100 | 1.94662100  |
| C | -5.00645400 | 6.04429100  | 0.03605100  |
| H | -5.93545700 | 6.59255300  | -0.12997900 |
| H | -4.17004700 | 6.61626900  | -0.38432200 |
| H | -4.85344200 | 5.91715200  | 1.11481800  |
| C | 3.93726800  | 3.71844200  | 1.66034100  |
| H | 3.44408200  | 4.31516100  | 0.88400000  |
| H | 4.56708700  | 4.36740700  | 2.27040000  |
| H | 3.18005600  | 3.24341900  | 2.29518300  |
| C | 7.28815900  | 1.84705000  | -0.46426800 |
| H | 6.90131200  | 2.85175800  | -0.26852100 |
| H | 7.31034200  | 1.66106200  | -1.54434800 |
| H | 8.29821500  | 1.75906700  | -0.05937800 |
| C | 5.31214900  | -2.19702700 | -2.24670600 |
| H | 4.89973100  | -1.80281300 | -3.18321700 |
| H | 4.58373500  | -2.87202700 | -1.78251600 |
| H | 6.22810500  | -2.75015600 | -2.45948500 |
| C | 2.80569300  | -3.25092800 | 0.63849600  |
| H | 2.79522800  | -3.98854400 | 1.44547600  |
| H | 3.82378700  | -2.88706400 | 0.48993400  |
| H | 2.45142900  | -3.72074100 | -0.27847600 |
| H | -0.61015400 | -2.41165400 | -1.01652600 |
| C | -3.04120400 | -3.03499000 | 2.18974600  |
| C | -2.82718200 | -3.18525000 | 0.82365000  |
| C | -3.50871000 | -2.35631700 | -0.07521000 |
| C | -4.41156100 | -1.40200800 | 0.38890700  |



|   |             |             |             |
|---|-------------|-------------|-------------|
| C | -4.61948700 | -1.26465000 | 1.76371100  |
| C | -3.93655500 | -2.06986600 | 2.68307800  |
| H | -2.50532400 | -3.67239700 | 2.88854200  |
| H | -2.12641800 | -3.92930200 | 0.45870300  |
| H | -4.92947800 | -0.76420300 | -0.31820700 |
| H | -5.31756700 | -0.51399700 | 2.12435900  |
| S | -3.12687700 | -2.46924300 | -1.82671500 |
| O | -4.02489400 | -1.52214800 | -2.52778100 |
| O | -1.67595500 | -1.99041000 | -1.91173000 |
| O | -3.25545500 | -3.89464600 | -2.20134400 |
| C | -4.14894200 | -1.92012300 | 4.16868600  |
| H | -4.58345500 | -2.83104100 | 4.59735600  |
| H | -3.19914100 | -1.74498500 | 4.68678500  |
| H | -4.81943500 | -1.08743700 | 4.39749600  |

## TSD2

|   |             |             |             |
|---|-------------|-------------|-------------|
| O | 0.18837500  | 1.35449300  | -0.86442200 |
| O | 0.27858300  | -2.75012100 | -0.42295100 |
| O | -5.14240600 | 4.84813000  | -0.57470600 |
| O | 4.81658000  | 2.80560600  | 0.98497800  |
| O | 6.48903000  | 0.86242500  | 0.17685400  |
| O | 5.66460400  | -1.19332200 | -1.29222800 |
| N | 1.91881800  | -2.11321200 | 1.06574000  |
| N | 1.19414500  | -0.15516300 | 1.86082400  |
| C | 0.28570500  | -0.60851900 | 0.90014700  |
| C | 0.72575800  | -1.88704700 | 0.44677500  |
| C | 2.15951300  | -1.03448100 | 1.91663500  |
| C | 1.06050300  | 0.36356600  | -1.00961300 |
| H | 0.75820000  | -0.46223100 | -1.65551600 |
| C | -1.03336300 | 0.07552400  | 0.75083200  |
| H | -1.11609200 | 0.79995800  | 1.56405300  |
| H | -1.87255000 | -0.61661300 | 0.82515000  |
| C | -1.15167900 | 0.82873300  | -0.60854300 |
| H | -1.37867800 | 0.10411000  | -1.39385100 |
| C | -2.15889500 | 1.93759300  | -0.61450700 |
| C | -3.37293100 | 1.76610700  | -1.29693500 |
| H | -3.55344600 | 0.84988100  | -1.85467900 |
| C | -4.35113900 | 2.75274200  | -1.25637000 |
| H | -5.29493000 | 2.62786900  | -1.77782800 |
| C | -4.12608900 | 3.94246400  | -0.54592200 |
| C | -2.91076600 | 4.12903100  | 0.13035300  |
| H | -2.71203600 | 5.03980800  | 0.68197100  |
| C | -1.94571400 | 3.12131000  | 0.09771900  |
| H | -1.00984000 | 3.26520500  | 0.63053900  |

|   |             |             |             |
|---|-------------|-------------|-------------|
| C | 2.46312900  | 0.59127700  | -0.79874400 |
| C | 2.91189000  | 1.69592500  | -0.05406300 |
| H | 2.19163800  | 2.42169300  | 0.29648800  |
| C | 4.26574400  | 1.80245900  | 0.25482000  |
| C | 5.17233800  | 0.80458900  | -0.17407000 |
| C | 4.71266700  | -0.29592600 | -0.92838000 |
| C | 3.35519300  | -0.40790400 | -1.23014900 |
| H | 2.97264200  | -1.25356700 | -1.78779100 |
| C | 3.41406500  | -0.92312300 | 2.70420200  |
| H | 3.60533200  | -1.82692700 | 3.29190000  |
| H | 3.34119300  | -0.06479700 | 3.37375400  |
| H | 4.27270600  | -0.77003200 | 2.03751700  |
| C | -4.96252600 | 6.09366700  | 0.09856300  |
| H | -5.88395800 | 6.65637300  | -0.06132300 |
| H | -4.11846900 | 6.65816700  | -0.31658300 |
| H | -4.81079100 | 5.95327300  | 1.17586400  |
| C | 3.94105000  | 3.80261100  | 1.51877300  |
| H | 3.43760700  | 4.36313900  | 0.72215000  |
| H | 4.57726800  | 4.47991700  | 2.09027900  |
| H | 3.19201300  | 3.35831300  | 2.18499600  |
| C | 7.26934600  | 1.82424700  | -0.55704900 |
| H | 6.88987200  | 2.83985800  | -0.40677700 |
| H | 7.27234900  | 1.58500800  | -1.62702900 |
| H | 8.28655200  | 1.75335200  | -0.16654300 |
| C | 5.27185900  | -2.28568900 | -2.12612800 |
| H | 4.85423500  | -1.93342500 | -3.07703400 |
| H | 4.54376900  | -2.93583300 | -1.62731100 |
| H | 6.18376900  | -2.85242800 | -2.31987900 |
| C | 2.79921300  | -3.25047500 | 0.83503100  |
| H | 2.80614800  | -3.91214200 | 1.70501100  |
| H | 3.81220200  | -2.89457900 | 0.63885700  |
| H | 2.43366300  | -3.80102900 | -0.03123700 |
| H | -0.56497300 | -2.45015000 | -0.97081500 |
| C | -3.11009200 | -3.08940200 | 2.13643300  |
| C | -2.83935100 | -3.22823400 | 0.77920500  |
| C | -3.47721000 | -2.38614200 | -0.13922900 |
| C | -4.39432100 | -1.43165500 | 0.29532200  |
| C | -4.65954300 | -1.30626500 | 1.66126100  |
| C | -4.01992400 | -2.12346100 | 2.60092900  |
| H | -2.60878200 | -3.73756900 | 2.85082600  |
| H | -2.12977500 | -3.97486000 | 0.43735100  |
| H | -4.87948400 | -0.78501300 | -0.42668300 |
| H | -5.36853500 | -0.55544200 | 1.99932400  |
| S | -3.02672500 | -2.48603700 | -1.87462500 |

|   |             |             |             |
|---|-------------|-------------|-------------|
| O | -3.87693500 | -1.51477500 | -2.60023400 |
| O | -1.56378400 | -2.02871400 | -1.89635200 |
| O | -3.16008500 | -3.90414900 | -2.27238900 |
| C | -4.29024600 | -1.98267000 | 4.07795700  |
| H | -4.70515400 | -2.90899300 | 4.49227000  |
| H | -3.36596600 | -1.77236800 | 4.62851300  |
| H | -4.99762300 | -1.17441800 | 4.28219200  |

### 3dd

|   |             |             |             |
|---|-------------|-------------|-------------|
| O | -0.96938800 | -0.22591600 | -1.66853100 |
| O | 1.37732200  | -3.72163800 | -0.87684600 |
| O | -6.75273700 | 1.28276600  | 0.38404900  |
| O | 1.71764300  | 3.51464000  | 0.49270800  |
| O | 4.27030000  | 2.67788300  | 0.52520600  |
| O | 4.97143000  | 0.29090800  | -0.45766900 |
| N | 1.36136100  | -2.79293700 | 1.25746800  |
| N | -0.27298400 | -1.23368400 | 1.09053700  |
| C | -0.14705200 | -1.88050800 | -0.21651300 |
| C | 0.93573800  | -2.94057200 | -0.04568900 |
| C | 0.60143500  | -1.77657800 | 1.86196200  |
| C | 0.25101200  | -0.86326900 | -1.33731900 |
| H | 0.61870100  | -1.46894300 | -2.18197200 |
| C | -1.48606900 | -2.38869900 | -0.77074700 |
| H | -2.16333500 | -2.68675400 | 0.03053200  |
| H | -1.29816600 | -3.25329300 | -1.41301500 |
| C | -2.03957600 | -1.19657800 | -1.61275600 |
| H | -2.24491000 | -1.54710600 | -2.63270000 |
| C | -3.27721200 | -0.52847800 | -1.06282000 |
| C | -4.47409300 | -0.51929100 | -1.79036100 |
| H | -4.51265400 | -0.99190800 | -2.76877200 |
| C | -5.61907100 | 0.08693000  | -1.28166900 |
| H | -6.54793800 | 0.09635600  | -1.84343500 |
| C | -5.58488400 | 0.70986300  | -0.02569200 |
| C | -4.39235700 | 0.71118800  | 0.71421100  |
| H | -4.34104000 | 1.18398700  | 1.68782400  |
| C | -3.25510700 | 0.09534300  | 0.19027300  |
| H | -2.33413700 | 0.08540000  | 0.76547800  |
| C | 1.30738400  | 0.13055700  | -0.92633200 |
| C | 0.95013300  | 1.39096800  | -0.44709400 |
| H | -0.09361700 | 1.67082300  | -0.43849900 |
| C | 1.94714700  | 2.25896500  | 0.01456300  |
| C | 3.29376500  | 1.85321300  | 0.01794800  |
| C | 3.64150900  | 0.58474000  | -0.47946600 |
| C | 2.64489700  | -0.27775100 | -0.95376800 |

|   |             |             |             |
|---|-------------|-------------|-------------|
| H | 2.89638400  | -1.25803900 | -1.34050500 |
| C | 0.85283900  | -1.40133600 | 3.28169000  |
| H | 0.72382800  | -2.26319000 | 3.94491600  |
| H | 0.15975700  | -0.61191000 | 3.57517500  |
| H | 1.87981000  | -1.04037300 | 3.40459100  |
| C | -6.78364700 | 1.91730300  | 1.66110700  |
| H | -7.79983200 | 2.29710500  | 1.78250700  |
| H | -6.07917700 | 2.75672800  | 1.71468800  |
| H | -6.56534300 | 1.20998900  | 2.47089100  |
| C | 0.37061200  | 3.98637400  | 0.51116800  |
| H | -0.06101900 | 4.01651500  | -0.49675500 |
| H | 0.41578500  | 5.00036200  | 0.91265300  |
| H | -0.26497200 | 3.36928200  | 1.15796200  |
| C | 4.72818300  | 3.66733700  | -0.40497600 |
| H | 3.91534600  | 4.34220800  | -0.69823300 |
| H | 5.15572200  | 3.20109200  | -1.30167700 |
| H | 5.50587500  | 4.24154300  | 0.10531000  |
| C | 5.37834600  | -0.99784600 | -0.91297300 |
| H | 5.13924300  | -1.14976000 | -1.97292300 |
| H | 4.91934400  | -1.80029400 | -0.32179500 |
| H | 6.46154400  | -1.03165000 | -0.78260700 |
| C | 2.45318800  | -3.54153000 | 1.85430700  |
| H | 2.11349900  | -4.09524100 | 2.73355500  |
| H | 3.26869900  | -2.87170800 | 2.14175000  |
| H | 2.81469100  | -4.24609000 | 1.10336900  |

## INTD2

|   |             |             |             |
|---|-------------|-------------|-------------|
| O | -0.17945000 | -1.32922800 | -1.00420600 |
| O | 1.51668800  | -0.73688700 | 2.11693600  |
| O | -6.38342900 | -2.06151000 | -1.65843200 |
| O | 2.07588800  | 3.21777900  | 0.22307800  |
| O | 4.61702100  | 2.89297600  | -0.58062000 |
| O | 5.47576000  | 0.65823200  | -1.70735400 |
| N | 3.17594400  | -2.21115400 | 1.46506100  |
| N | 2.05928800  | -3.83942700 | 0.42125700  |
| C | 1.14740800  | -2.87002400 | 0.83974600  |
| C | 1.85348700  | -1.85469800 | 1.51823700  |
| C | 3.24840400  | -3.41871700 | 0.78689900  |
| C | 1.12238800  | -1.40980300 | -1.12406900 |
| H | 1.53977500  | -2.31813200 | -1.55595400 |
| C | -0.32709300 | -3.03098900 | 0.70174000  |
| H | -0.84054700 | -2.42344300 | 1.44538600  |
| H | -0.60863300 | -4.07773800 | 0.85072200  |
| C | -0.82012700 | -2.62734300 | -0.71570500 |

|   |             |             |             |
|---|-------------|-------------|-------------|
| H | -0.41816500 | -3.33925600 | -1.44476300 |
| C | -2.30274800 | -2.48728800 | -0.90071600 |
| C | -2.89984600 | -2.96204200 | -2.07979400 |
| H | -2.28808400 | -3.45391900 | -2.83182000 |
| C | -4.26206500 | -2.81255400 | -2.30377300 |
| H | -4.72721200 | -3.18082000 | -3.21262400 |
| C | -5.06486000 | -2.17071300 | -1.34610800 |
| C | -4.48359800 | -1.69457000 | -0.16252100 |
| H | -5.07475500 | -1.19025600 | 0.59195500  |
| C | -3.11525600 | -1.86029900 | 0.05104100  |
| H | -2.68844800 | -1.46783100 | 0.96508600  |
| C | 1.95347300  | -0.24947300 | -1.03559700 |
| C | 1.49045500  | 0.95243000  | -0.46416500 |
| H | 0.47422800  | 1.00825200  | -0.09937500 |
| C | 2.37931500  | 2.01836300  | -0.32854600 |
| C | 3.72027400  | 1.88520000  | -0.76008400 |
| C | 4.17246400  | 0.67352900  | -1.32845000 |
| C | 3.29060600  | -0.39552300 | -1.46418400 |
| H | 3.61087700  | -1.33208400 | -1.90195100 |
| C | 4.54360800  | -4.10499000 | 0.52096800  |
| H | 5.22039800  | -3.47166700 | -0.06423500 |
| H | 4.35040100  | -5.02203800 | -0.03825000 |
| H | 5.06264400  | -4.36394900 | 1.45086500  |
| C | -7.24972600 | -1.41917000 | -0.72089200 |
| H | -8.24543300 | -1.44682500 | -1.16656300 |
| H | -6.95835300 | -0.37559600 | -0.55144200 |
| H | -7.26933700 | -1.95173100 | 0.23755800  |
| C | 0.74649100  | 3.40809600  | 0.72602300  |
| H | 0.00389800  | 3.28941000  | -0.06845100 |
| H | 0.71662000  | 4.43269200  | 1.09914300  |
| H | 0.53014300  | 2.71809700  | 1.54769800  |
| C | 4.45407700  | 4.03057200  | -1.44909200 |
| H | 3.48288600  | 4.51099900  | -1.29886900 |
| H | 4.56263900  | 3.73177200  | -2.49830500 |
| H | 5.25246500  | 4.72730500  | -1.18649700 |
| C | 5.99849900  | -0.55615900 | -2.24641800 |
| H | 5.47982700  | -0.84818800 | -3.16763400 |
| H | 5.93910400  | -1.37589000 | -1.51921400 |
| H | 7.04631000  | -0.35377200 | -2.47297000 |
| C | 4.28303300  | -1.39859200 | 1.95048600  |
| H | 4.70524200  | -0.79822600 | 1.13953900  |
| H | 5.05612600  | -2.04416700 | 2.36938300  |
| H | 3.91291800  | -0.73152700 | 2.72886000  |
| H | 0.53158300  | -0.47941100 | 1.98504700  |

|   |             |             |             |
|---|-------------|-------------|-------------|
| C | -2.98961800 | 4.22567000  | 0.40642500  |
| C | -2.59607600 | 3.33442900  | 1.40560800  |
| C | -2.26197300 | 2.02373900  | 1.06497700  |
| C | -2.31948000 | 1.60121300  | -0.26623200 |
| C | -2.71363600 | 2.50179000  | -1.25335400 |
| C | -3.05734000 | 3.82565500  | -0.93523000 |
| H | -3.24137400 | 5.24888300  | 0.67244900  |
| H | -2.52293700 | 3.65912300  | 2.43829100  |
| H | -2.02858600 | 0.58991200  | -0.52523000 |
| H | -2.74961900 | 2.17430000  | -2.28947000 |
| S | -1.76594000 | 0.88073800  | 2.36183700  |
| O | -2.99590700 | 0.20898600  | 2.84895600  |
| O | -0.86173200 | -0.09940500 | 1.62906900  |
| O | -1.03128900 | 1.68338400  | 3.36895000  |
| C | -3.48622100 | 4.78434900  | -2.01850600 |
| H | -4.43463000 | 4.46826200  | -2.46912300 |
| H | -3.62073300 | 5.79748700  | -1.62962300 |
| H | -2.74715600 | 4.82508100  | -2.82651300 |

### TSD3

|   |             |             |             |
|---|-------------|-------------|-------------|
| O | -0.19947200 | -1.31609400 | -1.06638400 |
| O | 1.47356200  | -0.74065100 | 2.12267000  |
| O | -6.43257700 | -2.00804200 | -1.57892500 |
| O | 2.09589900  | 3.19437100  | 0.23202100  |
| O | 4.64078000  | 2.86226500  | -0.54881400 |
| O | 5.49161000  | 0.61924200  | -1.68450000 |
| N | 3.15522200  | -2.18579900 | 1.50509500  |
| N | 2.10307100  | -3.75455800 | 0.30602100  |
| C | 1.16633800  | -2.78355900 | 0.69555900  |
| C | 1.84172700  | -1.82397700 | 1.50344600  |
| C | 3.26199100  | -3.36449100 | 0.76574900  |
| C | 1.11760600  | -1.43964700 | -1.11796600 |
| H | 1.51575600  | -2.30641100 | -1.64451300 |
| C | -0.30722600 | -3.02027100 | 0.61005000  |
| H | -0.82059600 | -2.44919900 | 1.38172800  |
| H | -0.52707500 | -4.08164200 | 0.75480400  |
| C | -0.84736200 | -2.60407600 | -0.78506400 |
| H | -0.47241200 | -3.31357200 | -1.53213200 |
| C | -2.33454900 | -2.45792000 | -0.92851700 |
| C | -2.96024200 | -2.89756500 | -2.10653400 |
| H | -2.36690700 | -3.36911300 | -2.88584500 |
| C | -4.32692100 | -2.74000600 | -2.29525600 |
| H | -4.81315900 | -3.08183600 | -3.20341300 |
| C | -5.10674000 | -2.12584100 | -1.30120800 |

|   |             |             |             |
|---|-------------|-------------|-------------|
| C | -4.49747800 | -1.68435300 | -0.11846300 |
| H | -5.06967900 | -1.20056200 | 0.66349900  |
| C | -3.12472000 | -1.85737900 | 0.05833900  |
| H | -2.67662500 | -1.49106000 | 0.97278200  |
| C | 1.96365900  | -0.27489800 | -1.02195000 |
| C | 1.50680300  | 0.92640700  | -0.45052800 |
| H | 0.48705400  | 0.99151300  | -0.09786400 |
| C | 2.40095200  | 1.98982200  | -0.31036000 |
| C | 3.74277500  | 1.85089400  | -0.73074900 |
| C | 4.18794500  | 0.64082900  | -1.30277600 |
| C | 3.29891100  | -0.42418000 | -1.44679400 |
| H | 3.61555500  | -1.35724200 | -1.89392800 |
| C | 4.56765200  | -4.04908100 | 0.55710800  |
| H | 5.29426900  | -3.38648100 | 0.07372100  |
| H | 4.41100100  | -4.92391800 | -0.07585000 |
| H | 5.00407100  | -4.37616500 | 1.50755700  |
| C | -7.27725200 | -1.39960400 | -0.60014100 |
| H | -8.28388400 | -1.41724600 | -1.02118900 |
| H | -6.98552000 | -0.36062100 | -0.40498100 |
| H | -7.27101300 | -1.96159800 | 0.34157800  |
| C | 0.76206800  | 3.39269400  | 0.71749800  |
| H | 0.02747800  | 3.27213500  | -0.08429300 |
| H | 0.73113400  | 4.41969300  | 1.08435700  |
| H | 0.53278700  | 2.70890800  | 1.54091500  |
| C | 4.50338000  | 3.96675200  | -1.46082400 |
| H | 3.53018300  | 4.45502600  | -1.34949700 |
| H | 4.63353900  | 3.63247600  | -2.49712900 |
| H | 5.29715800  | 4.67213100  | -1.20615400 |
| C | 6.00757100  | -0.59713000 | -2.22400000 |
| H | 5.49114900  | -0.88412500 | -3.14813800 |
| H | 5.93865000  | -1.41839600 | -1.49918100 |
| H | 7.05793800  | -0.40236400 | -2.44584200 |
| C | 4.23524800  | -1.39838700 | 2.08553000  |
| H | 4.63462600  | -0.69559900 | 1.34840100  |
| H | 5.02811400  | -2.06395800 | 2.42688400  |
| H | 3.84471400  | -0.83956400 | 2.93612000  |
| H | 0.47559200  | -0.48003200 | 1.97692000  |
| C | -2.97806100 | 4.20389100  | 0.37025300  |
| C | -2.59193400 | 3.31935400  | 1.37805100  |
| C | -2.25035700 | 2.00801800  | 1.04693300  |
| C | -2.29127400 | 1.57822800  | -0.28238200 |
| C | -2.67790000 | 2.47278800  | -1.27793500 |
| C | -3.03043800 | 3.79659400  | -0.97005500 |
| H | -3.23595100 | 5.22759000  | 0.62831400  |

|   |             |             |             |
|---|-------------|-------------|-------------|
| H | -2.53097200 | 3.65002600  | 2.40965400  |
| H | -1.99283200 | 0.56733000  | -0.53352400 |
| H | -2.70103200 | 2.13999800  | -2.31267800 |
| S | -1.76931900 | 0.87466100  | 2.35644900  |
| O | -3.00470400 | 0.22114600  | 2.85137600  |
| O | -0.87770500 | -0.12842800 | 1.63226800  |
| O | -1.01945200 | 1.67475900  | 3.35328800  |
| C | -3.45320900 | 4.74764100  | -2.06241100 |
| H | -4.40316100 | 4.43236000  | -2.51044000 |
| H | -3.58272900 | 5.76503000  | -1.68305400 |
| H | -2.71348900 | 4.77657200  | -2.87021100 |

### 3'dd

|   |             |             |             |
|---|-------------|-------------|-------------|
| O | 1.03496900  | 0.02140700  | -1.28021300 |
| O | 0.42923600  | 0.64754700  | 1.89053400  |
| O | 6.85068800  | -1.33657000 | 0.69174200  |
| O | -2.10990000 | -3.25676700 | 1.01568000  |
| O | -4.59735300 | -2.44385900 | 0.40517200  |
| O | -5.02973500 | -0.27053600 | -1.09363900 |
| N | -1.22127100 | 2.25804200  | 1.63311600  |
| N | -0.85246300 | 3.00781100  | -0.47176100 |
| C | 0.08025000  | 1.90716900  | -0.23355500 |
| C | -0.16139700 | 1.47823600  | 1.21514600  |
| C | -1.55977000 | 3.13971200  | 0.59725300  |
| C | -0.19002100 | 0.72553500  | -1.23767600 |
| H | -0.39506100 | 1.21086800  | -2.20518500 |
| C | 1.56623700  | 2.21986700  | -0.51327300 |
| H | 2.12408600  | 2.33758700  | 0.41735400  |
| H | 1.64876300  | 3.14647500  | -1.08497400 |
| C | 2.08884600  | 1.00271600  | -1.33736600 |
| H | 2.22001400  | 1.31460200  | -2.38330100 |
| C | 3.36669400  | 0.38270900  | -0.83502100 |
| C | 3.40976000  | -0.21593600 | 0.43657700  |
| H | 2.51040800  | -0.22391300 | 1.04546500  |
| C | 4.58408600  | -0.77987900 | 0.91422400  |
| H | 4.62630300  | -1.24654700 | 1.89375800  |
| C | 5.75165000  | -0.75664400 | 0.13046300  |
| C | 5.72313700  | -0.16197300 | -1.13626400 |
| H | 6.60751700  | -0.13319400 | -1.76105500 |
| C | 4.52823600  | 0.39518900  | -1.60618000 |
| H | 4.51195300  | 0.84769200  | -2.59472100 |
| C | -1.33956600 | -0.17559600 | -0.86768500 |
| C | -1.11719500 | -1.33399100 | -0.12056000 |
| H | -0.10425500 | -1.60466300 | 0.13849700  |



|   |             |             |             |
|---|-------------|-------------|-------------|
| C | -2.20878400 | -2.10857700 | 0.28822200  |
| C | -3.51893500 | -1.71660500 | -0.04067500 |
| C | -3.72851800 | -0.55649600 | -0.80711300 |
| C | -2.63505200 | 0.21568500  | -1.22056200 |
| H | -2.77792500 | 1.11480400  | -1.80631700 |
| C | -2.66536300 | 4.12155300  | 0.78334000  |
| H | -3.61017600 | 3.60275200  | 0.97935400  |
| H | -2.76843800 | 4.72715100  | -0.11800000 |
| H | -2.46590800 | 4.77508600  | 1.63915900  |
| C | 8.06358300  | -1.34933000 | -0.05921300 |
| H | 8.79918000  | -1.85881100 | 0.56586100  |
| H | 8.41729500  | -0.33318400 | -0.27396300 |
| H | 7.94959100  | -1.89932500 | -1.00166300 |
| C | -0.80884400 | -3.67028500 | 1.43355800  |
| H | -0.16022500 | -3.89540900 | 0.57811700  |
| H | -0.95897100 | -4.57976300 | 2.01804400  |
| H | -0.32779000 | -2.91116100 | 2.06218100  |
| C | -4.89491500 | -3.58687100 | -0.40619600 |
| H | -4.05783600 | -4.29503100 | -0.41635200 |
| H | -5.13402400 | -3.29123800 | -1.43565500 |
| H | -5.76825200 | -4.07008600 | 0.03960400  |
| C | -5.30323300 | 0.90715300  | -1.84974000 |
| H | -4.85281300 | 0.86218200  | -2.84916700 |
| H | -4.95114500 | 1.81017800  | -1.33513000 |
| H | -6.38929700 | 0.95216100  | -1.94921100 |
| C | -1.83817200 | 2.16621800  | 2.94456700  |
| H | -2.89363800 | 1.89413200  | 2.85705500  |
| H | -1.75064500 | 3.11237100  | 3.48577100  |
| H | -1.31209500 | 1.38618400  | 3.49715300  |

## 2b

|             |             |             |            |
|-------------|-------------|-------------|------------|
| C0.00000000 | 0.57566200  | 0.00000000  |            |
| C           | 1.33515500  | 0.14667300  | 0.00000000 |
| C           | 1.62995300  | -1.21642500 | 0.00000000 |
| C           | 0.59029800  | -2.15046100 | 0.00000000 |
| C           | -0.74495600 | -1.72633300 | 0.00000000 |
| C           | -1.04119300 | -0.36742100 | 0.00000000 |
| H           | 2.13531600  | 0.88310700  | 0.00000000 |
| H           | -2.06781300 | -0.01431800 | 0.00000000 |
| C           | -0.30062700 | 2.02145200  | 0.00000000 |
| O           | -1.42584300 | 2.49659700  | 0.00000000 |
| H           | 0.59229900  | 2.68180700  | 0.00000000 |
| H           | 2.66299300  | -1.55073300 | 0.00000000 |
| H           | -1.54655000 | -2.45907300 | 0.00000000 |

|   |            |             |            |
|---|------------|-------------|------------|
| H | 0.81872000 | -3.21244800 | 0.00000000 |
|---|------------|-------------|------------|

## TSA1-2b

|   |             |             |             |
|---|-------------|-------------|-------------|
| C | -3.88617300 | -0.72005400 | -0.31084500 |
| C | -2.63341400 | -0.31652500 | 0.20398800  |
| C | -2.47766900 | -0.21425300 | 1.60099400  |
| C | -3.52234900 | -0.50273200 | 2.46853600  |
| C | -4.76135700 | -0.90444700 | 1.93826400  |
| C | -4.93221500 | -1.01192600 | 0.54207700  |
| H | -4.02784700 | -0.81907500 | -1.38029000 |
| H | -1.51317900 | 0.08887100  | 1.99968100  |
| H | -3.37211300 | -0.42116900 | 3.53766600  |
| H | -5.89763500 | -1.33039600 | 0.16316000  |
| O | -5.84627800 | -1.21275500 | 2.67894700  |
| C | -5.75893200 | -1.12569500 | 4.10649000  |
| H | -5.53311600 | -0.10346800 | 4.42989500  |
| H | -6.74196400 | -1.41522800 | 4.47992600  |
| H | -5.00360700 | -1.81429400 | 4.50151900  |
| C | -1.50261300 | 0.02199700  | -0.62804700 |
| C | -1.33620500 | -0.41958000 | -2.04930900 |
| H | -2.23716400 | -0.25482300 | -2.64410800 |
| H | -0.50770100 | 0.13036600  | -2.50230400 |
| C | -1.02616900 | -1.88843800 | -1.96435900 |
| C | 0.19533300  | -2.50495000 | -1.74752700 |
| C | -1.42811500 | -4.01526200 | -1.83869500 |
| N | -2.02507000 | -2.85196600 | -1.99583200 |
| N | -0.06688000 | -3.85768600 | -1.67705100 |
| C | -2.08728200 | -5.35268700 | -1.83654100 |
| H | -1.95226900 | -5.87314500 | -0.88047800 |
| H | -3.15738300 | -5.21962800 | -2.00768400 |
| H | -1.68708000 | -6.00543400 | -2.62171000 |
| C | 0.92647200  | -4.90601400 | -1.50775100 |
| H | 1.11759100  | -5.42177700 | -2.45413500 |
| H | 1.85424700  | -4.45373800 | -1.15720100 |
| H | 0.58075900  | -5.63122200 | -0.76766600 |
| O | 1.46148200  | -2.08578200 | -1.65644900 |
| C | -0.70961200 | 4.05689700  | -0.97185900 |
| C | 0.53384000  | 4.71726600  | -0.97651300 |
| C | 0.57169000  | 6.10886400  | -0.98053800 |
| C | -0.62259100 | 6.83575600  | -0.98418800 |
| C | -1.86239500 | 6.18009400  | -0.97613000 |
| C | -1.91110700 | 4.79293200  | -0.96555100 |
| H | 1.44723000  | 4.13059200  | -0.94635100 |

|   |             |             |             |
|---|-------------|-------------|-------------|
| H | -2.85914200 | 4.26502200  | -0.95794700 |
| C | -0.70737600 | 2.60797600  | -0.95856100 |
| O | -1.74862200 | 1.92977400  | -0.84204200 |
| H | 0.26061200  | 2.10453200  | -1.05706700 |
| H | -0.56741900 | 0.11690400  | -0.08475100 |
| H | 1.52120800  | -1.11587000 | -1.39553200 |
| C | 5.06622400  | -1.90693100 | 0.96621000  |
| C | 3.82957000  | -1.33720800 | 0.67838400  |
| C | 3.66183800  | 0.04427900  | 0.82245600  |
| C | 4.71681600  | 0.84592500  | 1.25381800  |
| C | 5.95126900  | 0.25936100  | 1.54016200  |
| C | 6.14645400  | -1.12057000 | 1.40062500  |
| H | 5.19948500  | -2.97990700 | 0.85405700  |
| H | 3.00791000  | -1.95823500 | 0.33670000  |
| H | 4.56771400  | 1.91459900  | 1.36278600  |
| H | 6.77327300  | 0.88473400  | 1.87857400  |
| C | 7.48666100  | -1.75239200 | 1.68393800  |
| H | 7.37347800  | -2.71856300 | 2.18636300  |
| H | 8.03623400  | -1.93608000 | 0.75208100  |
| H | 8.11000900  | -1.10957200 | 2.31215700  |
| S | 2.05723200  | 0.77587600  | 0.47752100  |
| O | 2.20335100  | 2.24691400  | 0.61249300  |
| O | 1.09126400  | 0.14823500  | 1.42124100  |
| O | 1.74623900  | 0.39401700  | -0.96167700 |
| H | 1.52520800  | 6.62714700  | -0.97759000 |
| H | -2.78141800 | 6.75757300  | -0.97702700 |
| H | -0.59103000 | 7.92150300  | -0.99013900 |

## 2c

|   |             |             |            |
|---|-------------|-------------|------------|
| C | 1.31668300  | 0.20838800  | 0.00000000 |
| C | 0.52346800  | 1.36349100  | 0.00000000 |
| C | -0.86354300 | 1.26016500  | 0.00000000 |
| C | -1.45510600 | -0.01452400 | 0.00000000 |
| C | -0.66347200 | -1.17979800 | 0.00000000 |
| C | 0.71860000  | -1.06169100 | 0.00000000 |
| H | 0.99445800  | 2.34241600  | 0.00000000 |
| H | 1.35206700  | -1.94252900 | 0.00000000 |
| C | 2.79361500  | 0.33784400  | 0.00000000 |
| O | 3.56128100  | -0.60936900 | 0.00000000 |
| H | 3.17111400  | 1.38068000  | 0.00000000 |
| H | -1.48723900 | 2.14726900  | 0.00000000 |
| H | -1.13820500 | -2.15486900 | 0.00000000 |
| C | -2.88379400 | -0.13155800 | 0.00000000 |

|   |             |             |            |
|---|-------------|-------------|------------|
| N | -4.04302100 | -0.22741600 | 0.00000000 |
|---|-------------|-------------|------------|

## TSA1-2c

|   |             |             |             |
|---|-------------|-------------|-------------|
| C | 1.79589700  | -3.60847300 | -0.24903800 |
| C | 1.23942100  | -2.42287200 | 0.27622700  |
| C | 1.25548900  | -2.22730600 | 1.66954400  |
| C | 1.80933100  | -3.17103700 | 2.52610400  |
| C | 2.35878100  | -4.34662500 | 1.98653500  |
| C | 2.34740300  | -4.55610300 | 0.59236000  |
| H | 1.80628100  | -3.77778000 | -1.31946900 |
| H | 0.83241200  | -1.31254100 | 2.07640600  |
| H | 1.81393400  | -2.99036600 | 3.59359500  |
| H | 2.78395400  | -5.46984900 | 0.20299000  |
| O | 2.92239500  | -5.33354800 | 2.71660600  |
| C | 2.99724500  | -5.18378600 | 4.13895000  |
| H | 1.99958000  | -5.10712100 | 4.58604400  |
| H | 3.48961500  | -6.08555000 | 4.50512000  |
| H | 3.59283800  | -4.30638800 | 4.41560500  |
| C | 0.62713500  | -1.39587100 | -0.54897400 |
| C | 0.96790300  | -1.18592100 | -1.99750000 |
| H | 0.95710800  | -2.12119400 | -2.56121100 |
| H | 0.24226200  | -0.50043400 | -2.44356300 |
| C | 2.34436900  | -0.58328800 | -2.01086800 |
| C | 2.70584100  | 0.74433600  | -1.85915600 |
| C | 4.51184800  | -0.53361200 | -2.02930800 |
| N | 3.49006900  | -1.36233000 | -2.09558900 |
| N | 4.08504500  | 0.76964100  | -1.87678200 |
| C | 5.95486000  | -0.90334500 | -2.10852600 |
| H | 6.49991400  | -0.61983700 | -1.19993700 |
| H | 6.03552900  | -1.98497100 | -2.23420900 |
| H | 6.45596000  | -0.41641200 | -2.95380000 |
| C | 4.90701200  | 1.96658000  | -1.80227300 |
| H | 5.21772600  | 2.29423200  | -2.79973000 |
| H | 4.32691900  | 2.76164900  | -1.33275700 |
| H | 5.79428600  | 1.76841200  | -1.19796700 |
| O | 2.03766200  | 1.89994200  | -1.76294600 |
| C | -3.42464600 | -1.38299300 | -0.78525000 |
| C | -4.33084300 | -0.31352900 | -0.89452400 |
| C | -5.69717900 | -0.56428200 | -0.88067400 |
| C | -6.14946100 | -1.88959200 | -0.76085300 |
| C | -5.24467800 | -2.96364400 | -0.64317500 |
| C | -3.88356000 | -2.70676300 | -0.65242500 |

|   |             |             |             |
|---|-------------|-------------|-------------|
| H | -3.95675200 | 0.70270800  | -0.96151200 |
| H | -3.16728900 | -3.51632600 | -0.56591100 |
| C | -2.00456200 | -1.07764900 | -0.81195100 |
| O | -1.13774100 | -1.95479500 | -0.61295900 |
| H | -1.70203800 | -0.04573200 | -1.01527800 |
| H | 0.43973700  | -0.47023100 | -0.01395400 |
| H | 1.10150300  | 1.76638900  | -1.42454900 |
| C | 0.90971600  | 5.62225100  | 0.73053400  |
| C | 0.70774100  | 4.26938900  | 0.47649700  |
| C | -0.49944300 | 3.67427600  | 0.86007900  |
| C | -1.49129000 | 4.42204800  | 1.49067700  |
| C | -1.27257000 | 5.77868700  | 1.74010600  |
| C | -0.07315900 | 6.39820200  | 1.36893000  |
| H | 1.84404100  | 6.08900000  | 0.42908100  |
| H | 1.47507700  | 3.68647700  | -0.02336800 |
| H | -2.42346200 | 3.94607400  | 1.77492000  |
| H | -2.04733300 | 6.36224600  | 2.23009700  |
| C | 0.17618900  | 7.85819600  | 1.65354900  |
| H | 0.93810400  | 7.97947800  | 2.43325900  |
| H | 0.54461700  | 8.37839000  | 0.76264000  |
| H | -0.73231100 | 8.36342300  | 1.99306400  |
| S | -0.74208300 | 1.91795700  | 0.58019100  |
| O | -2.17623300 | 1.61956700  | 0.82788600  |
| O | 0.21096100  | 1.20450500  | 1.47390100  |
| O | -0.39412800 | 1.69741800  | -0.88442800 |
| H | -6.41073900 | 0.24803000  | -0.95937400 |
| H | -5.61762500 | -3.97713200 | -0.54893000 |
| C | -7.55867900 | -2.15612400 | -0.75748700 |
| N | -8.70090100 | -2.37353600 | -0.75670000 |

## 2d

|   |             |             |             |
|---|-------------|-------------|-------------|
| C | -0.61067200 | -0.21829200 | 0.40866900  |
| C | 0.20024400  | -1.23812600 | -0.42501200 |
| C | 1.69851400  | -1.17728900 | -0.05131100 |
| C | 2.14643400  | 0.25007100  | 0.34686300  |
| C | 1.29491700  | 1.31116100  | -0.36167200 |
| C | -0.17949000 | 1.22917900  | 0.09191100  |
| H | -0.18748700 | -2.25326700 | -0.28270900 |
| H | -0.83849000 | 1.63589900  | -0.68213200 |
| C | -2.08738600 | -0.46366900 | 0.22233600  |
| O | -2.89168500 | 0.33812300  | -0.21394800 |
| H | -2.41817400 | -1.48583500 | 0.51399900  |

|   |             |             |             |
|---|-------------|-------------|-------------|
| H | 1.90020300  | -1.86855700 | 0.77539900  |
| H | 1.68715700  | 2.31605600  | -0.17044300 |
| H | 2.04114500  | 0.38417000  | 1.43155200  |
| H | 3.20974700  | 0.38784800  | 0.12126800  |
| H | 2.28765600  | -1.53088400 | -0.90546500 |
| H | 0.06217900  | -0.99779600 | -1.48622200 |
| H | -0.41636200 | -0.45397600 | 1.46776200  |
| H | -0.33154800 | 1.84726100  | 0.98408600  |
| H | 1.36208900  | 1.15588800  | -1.44622200 |

### TSA1-2d

|   |             |             |             |
|---|-------------|-------------|-------------|
| C | -4.08743800 | -0.37555700 | -0.37815600 |
| C |             | -2.77407900 | -0.24977200 |
| C |             | -2.57046100 | -0.34327400 |
| C |             | -3.63167500 | -0.55185800 |
| C |             | -4.93320700 | -0.66411300 |
| C |             | -5.15062900 | -0.57640900 |
| H |             | -4.26836800 | -0.31031800 |
| H |             | -1.55707200 | -0.27796900 |
| H |             | -3.44525000 | -0.63225300 |
| H |             | -6.16545400 | -0.67292600 |
| O |             | -6.04042900 | -0.86063600 |
| C |             | -5.90639500 | -0.96801000 |
| H |             | -5.49032200 | -0.05050100 |
| H |             | -6.91693700 | -1.12033400 |
| H |             | -5.28038000 | -1.82351500 |
| C |             | -1.62359700 | -0.00680200 |
| C |             | -1.51783200 | -0.44528600 |
| H |             | -2.44880000 | -0.31304400 |
| H |             | -0.72822500 | 0.13002900  |
| C |             | -1.13455600 | -1.89512800 |
| C |             | 0.14180600  | -2.41095100 |
| C |             | -1.36435100 | -4.03588200 |
| N |             | -2.06022000 | -2.92411700 |
| N |             | -0.00974900 | -3.77598200 |
| C |             | -1.91406500 | -5.41874600 |
| H |             | -1.61986800 | -5.90733900 |
| H |             | -3.00428900 | -5.37073700 |
| H |             | -1.56631300 | -6.05582900 |
| C |             | 1.06665900  | -4.74175600 |
| H |             | 1.18191100  | -5.34072000 |
| H |             | 1.99399200  | -4.20059500 |

|   |             |             |             |
|---|-------------|-------------|-------------|
| H | 0.86282500  | -5.40506700 | -0.81575700 |
| O | 1.36808600  | -1.87068300 | -1.97463000 |
| H | -0.67434800 | -0.05162700 | -0.19568500 |
| H | 1.39274500  | -0.98092400 | -1.50963500 |
| C | 5.23089600  | -1.87376500 | 0.47478300  |
| C | 3.92619500  | -1.42273100 | 0.29643100  |
| C | 3.49042000  | -0.29108600 | 0.99409400  |
| C | 4.35072000  | 0.38012500  | 1.86139900  |
| C | 5.65653100  | -0.08456900 | 2.03007800  |
| C | 6.11747500  | -1.21399000 | 1.34224600  |
| H | 5.57003900  | -2.75264600 | -0.06768400 |
| H | 3.25702400  | -1.94200600 | -0.38191000 |
| H | 3.99844500  | 1.25611500  | 2.39486500  |
| H | 6.32541200  | 0.43944900  | 2.70771200  |
| C | 7.53634700  | -1.70043200 | 1.50216900  |
| H | 8.00008700  | -1.29834200 | 2.40756800  |
| H | 7.58012400  | -2.79353200 | 1.54982600  |
| H | 8.15309200  | -1.39117000 | 0.64889400  |
| S | 1.79216400  | 0.26868200  | 0.80377800  |
| O | 1.69513600  | 1.58144900  | 1.49708100  |
| O | 0.91920400  | -0.79431000 | 1.37475300  |
| O | 1.57436900  | 0.41041200  | -0.69180700 |
| C | -0.62421800 | 3.97148800  | -0.35567400 |
| C | 0.89689300  | 4.08341400  | -0.68807200 |
| C | 1.33619500  | 5.56241200  | -0.61453100 |
| C | 0.21045200  | 6.53907200  | -1.02677400 |
| C | -0.73248000 | 5.88708300  | -2.04581800 |
| C | -1.48084800 | 4.68791500  | -1.42135400 |
| H | 1.48784700  | 3.46261100  | -0.01031700 |
| H | -1.76352500 | 3.97602800  | -2.20283000 |
| C | -0.92445100 | 2.53040100  | -0.16768900 |
| O | -1.58132700 | 1.86750100  | -0.98258800 |
| H | -0.49721800 | 2.04659200  | 0.71961400  |
| H | 1.67130800  | 5.79446900  | 0.40271300  |
| H | -1.45765600 | 6.61356900  | -2.42802700 |
| H | -0.37261400 | 6.83135600  | -0.14332900 |
| H | 0.64130300  | 7.46192300  | -1.43008900 |
| H | 2.20508600  | 5.69240000  | -1.26996000 |
| H | 1.04242600  | 3.68296500  | -1.69734200 |
| H | -0.75886500 | 4.42676800  | 0.63633200  |
| H | -2.40984000 | 5.02738700  | -0.95036100 |
| H | -0.14531400 | 5.55089900  | -2.90965900 |

2e

|   |             |             |             |
|---|-------------|-------------|-------------|
| C | -0.61067200 | -0.21829200 | 0.40866900  |
| C | 0.20024400  | -1.23812600 | -0.42501200 |
| C | 1.69851400  | -1.17728900 | -0.05131100 |
| C | 2.14643400  | 0.25007100  | 0.34686300  |
| C | 1.29491700  | 1.31116100  | -0.36167200 |
| C | -0.17949000 | 1.22917900  | 0.09191100  |
| H | -0.18748700 | -2.25326700 | -0.28270900 |
| H | -0.83849000 | 1.63589900  | -0.68213200 |
| C | -2.08738600 | -0.46366900 | 0.22233600  |
| O | -2.89168500 | 0.33812300  | -0.21394800 |
| H | -2.41817400 | -1.48583500 | 0.51399900  |
| H | 1.90020300  | -1.86855700 | 0.77539900  |
| H | 1.68715700  | 2.31605600  | -0.17044300 |
| H | 2.04114500  | 0.38417000  | 1.43155200  |
| H | 3.20974700  | 0.38784800  | 0.12126800  |
| H | 2.28765600  | -1.53088400 | -0.90546500 |
| H | 0.06217900  | -0.99779600 | -1.48622200 |
| H | -0.41636200 | -0.45397600 | 1.46776200  |
| H | -0.33154800 | 1.84726100  | 0.98408600  |
| H | 1.36208900  | 1.15588800  | -1.44622200 |

TSA1-2e

|   |             |             |             |
|---|-------------|-------------|-------------|
| C | -4.08743800 | -0.37555700 | -0.37815600 |
| C | -2.77407900 | -0.24977200 | 0.12664700  |
| C | -2.57046100 | -0.34327400 | 1.51779000  |
| C | -3.63167500 | -0.55185800 | 2.38991200  |
| C | -4.93320700 | -0.66411300 | 1.87087600  |
| C | -5.15062900 | -0.57640900 | 0.47957000  |
| H | -4.26836800 | -0.31031800 | -1.44546600 |
| H | -1.55707200 | -0.27796900 | 1.90533700  |
| H | -3.44525000 | -0.63225300 | 3.45342900  |
| H | -6.16545400 | -0.67292600 | 0.10839200  |
| O | -6.04042900 | -0.86063600 | 2.61677600  |
| C | -5.90639500 | -0.96801000 | 4.03896900  |
| H | -5.49032200 | -0.05050100 | 4.47018100  |
| H | -6.91693700 | -1.12033400 | 4.41997900  |
| H | -5.28038000 | -1.82351500 | 4.31606800  |
| C | -1.62359700 | -0.00680200 | -0.71598000 |
| C | -1.51783200 | -0.44528600 | -2.14436700 |
| H | -2.44880000 | -0.31304400 | -2.69903200 |
| H | -0.72822500 | 0.13002900  | -2.63560200 |
| C | -1.13455600 | -1.89512800 | -2.06241100 |



|   |             |             |             |
|---|-------------|-------------|-------------|
| C | 0.14180600  | -2.41095100 | -1.93530900 |
| C | -1.36435100 | -4.03588200 | -1.84098600 |
| N | -2.06022000 | -2.92411700 | -1.97902900 |
| N | -0.00974900 | -3.77598200 | -1.80586500 |
| C | -1.91406500 | -5.41874600 | -1.74198900 |
| H | -1.61986800 | -5.90733900 | -0.80538600 |
| H | -3.00428900 | -5.37073700 | -1.77828400 |
| H | -1.56631300 | -6.05582900 | -2.56444200 |
| C | 1.06665900  | -4.74175600 | -1.65973700 |
| H | 1.18191100  | -5.34072000 | -2.56831700 |
| H | 1.99399200  | -4.20059500 | -1.47136600 |
| H | 0.86282500  | -5.40506700 | -0.81575700 |
| O | 1.36808600  | -1.87068300 | -1.97463000 |
| H | -0.67434800 | -0.05162700 | -0.19568500 |
| H | 1.39274500  | -0.98092400 | -1.50963500 |
| C | 5.23089600  | -1.87376500 | 0.47478300  |
| C | 3.92619500  | -1.42273100 | 0.29643100  |
| C | 3.49042000  | -0.29108600 | 0.99409400  |
| C | 4.35072000  | 0.38012500  | 1.86139900  |
| C | 5.65653100  | -0.08456900 | 2.03007800  |
| C | 6.11747500  | -1.21399000 | 1.34224600  |
| H | 5.57003900  | -2.75264600 | -0.06768400 |
| H | 3.25702400  | -1.94200600 | -0.38191000 |
| H | 3.99844500  | 1.25611500  | 2.39486500  |
| H | 6.32541200  | 0.43944900  | 2.70771200  |
| C | 7.53634700  | -1.70043200 | 1.50216900  |
| H | 8.00008700  | -1.29834200 | 2.40756800  |
| H | 7.58012400  | -2.79353200 | 1.54982600  |
| H | 8.15309200  | -1.39117000 | 0.64889400  |
| S | 1.79216400  | 0.26868200  | 0.80377800  |
| O | 1.69513600  | 1.58144900  | 1.49708100  |
| O | 0.91920400  | -0.79431000 | 1.37475300  |
| O | 1.57436900  | 0.41041200  | -0.69180700 |
| C | -0.62421800 | 3.97148800  | -0.35567400 |
| C | 0.89689300  | 4.08341400  | -0.68807200 |
| C | 1.33619500  | 5.56241200  | -0.61453100 |
| C | 0.21045200  | 6.53907200  | -1.02677400 |
| C | -0.73248000 | 5.88708300  | -2.04581800 |
| C | -1.48084800 | 4.68791500  | -1.42135400 |
| H | 1.48784700  | 3.46261100  | -0.01031700 |
| H | -1.76352500 | 3.97602800  | -2.20283000 |
| C | -0.92445100 | 2.53040100  | -0.16768900 |
| O | -1.58132700 | 1.86750100  | -0.98258800 |
| H | -0.49721800 | 2.04659200  | 0.71961400  |

|   |             |            |             |
|---|-------------|------------|-------------|
| H | 1.67130800  | 5.79446900 | 0.40271300  |
| H | -1.45765600 | 6.61356900 | -2.42802700 |
| H | -0.37261400 | 6.83135600 | -0.14332900 |
| H | 0.64130300  | 7.46192300 | -1.43008900 |
| H | 2.20508600  | 5.69240000 | -1.26996000 |
| H | 1.04242600  | 3.68296500 | -1.69734200 |
| H | -0.75886500 | 4.42676800 | 0.63633200  |
| H | -2.40984000 | 5.02738700 | -0.95036100 |
| H | -0.14531400 | 5.55089900 | -2.90965900 |

## N-TSA1

|   |             |             |             |
|---|-------------|-------------|-------------|
| C | -0.55849900 | -2.24324800 | 0.67073400  |
| C | -0.26428600 | -2.35193500 | -0.70772700 |
| C | -0.06082300 | -3.63534100 | -1.24968100 |
| C | -0.15407200 | -4.77814300 | -0.46597900 |
| C | -0.46014400 | -4.65148500 | 0.90134600  |
| C | -0.65969600 | -3.37532700 | 1.45978700  |
| H | -0.72661800 | -1.27676200 | 1.13071800  |
| H | 0.17040700  | -3.73463600 | -2.30673800 |
| H | 0.00139800  | -5.75129700 | -0.91477900 |
| H | -0.90353800 | -3.29789200 | 2.51406300  |
| O | -0.58727200 | -5.69123000 | 1.75493500  |
| C | -0.42826900 | -7.02158200 | 1.25035100  |
| H | 0.57766900  | -7.17711400 | 0.84394900  |
| H | -0.57887600 | -7.68194800 | 2.10525600  |
| H | -1.17527700 | -7.24780900 | 0.48084400  |
| C | -0.13502500 | -1.18953800 | -1.57569500 |
| C | -0.77684000 | 0.13369500  | -1.25395700 |
| H | -0.39008000 | 0.89503200  | -1.93685500 |
| H | -0.57167200 | 0.45249600  | -0.22769300 |
| C | -2.23509100 | -0.06516700 | -1.48993300 |
| C | -2.93878300 | 0.01553000  | -2.70844800 |
| C | -4.37037400 | -0.52528500 | -0.99522000 |
| N | -3.14453400 | -0.41909000 | -0.49513400 |
| N | -4.30081700 | -0.27889300 | -2.32188000 |
| C | -5.60136700 | -0.79518100 | -0.21019200 |
| H | -6.13082200 | -1.67596400 | -0.58952100 |
| H | -5.33933700 | -0.96553900 | 0.83606900  |
| H | -6.29089000 | 0.05546100  | -0.26055600 |
| C | -5.41013700 | -0.26608200 | -3.25444700 |
| H | -5.87100100 | -1.25490200 | -3.33731600 |
| H | -6.16862100 | 0.46062300  | -2.94937600 |
| H | -4.99929200 | 0.02273200  | -4.22357400 |

|   |             |             |             |
|---|-------------|-------------|-------------|
| O | -2.60128700 | 0.27505800  | -3.88205800 |
| C | 3.50586300  | 0.02291600  | -0.30590300 |
| C | 4.00193900  | 0.19947800  | 0.99776100  |
| C | 5.27841100  | 0.70905800  | 1.18360600  |
| C | 6.07967000  | 1.05773400  | 0.07120100  |
| C | 5.54894000  | 0.92571800  | -1.24733800 |
| C | 4.28162900  | 0.39175500  | -1.42645200 |
| H | 3.41165200  | -0.07609500 | 1.86574100  |
| H | 3.85921600  | 0.27294000  | -2.41555900 |
| O | 6.34846800  | 1.36625300  | -2.25082300 |
| O | 7.29874900  | 1.55321100  | 0.35256600  |
| O | 5.78647300  | 0.80144800  | 2.45080900  |
| C | 5.88219900  | 1.23542400  | -3.59725500 |
| H | 5.70634300  | 0.18537700  | -3.85827700 |
| H | 4.96483500  | 1.81380400  | -3.75674100 |
| H | 6.67832700  | 1.63785400  | -4.22456600 |
| C | 8.44403400  | 1.23435600  | -0.46833900 |
| H | 8.51973500  | 1.91174300  | -1.31959200 |
| H | 9.30630500  | 1.35930700  | 0.18900700  |
| H | 8.39718900  | 0.20025800  | -0.81975200 |
| C | 5.89147700  | 2.13854800  | 2.97222500  |
| H | 6.31878100  | 2.04177500  | 3.97232300  |
| H | 6.54700700  | 2.76017900  | 2.35451900  |
| H | 4.90152700  | 2.60547100  | 3.04489800  |
| C | 2.18980200  | -0.52174900 | -0.46341600 |
| O | 1.66447300  | -0.73106300 | -1.58395100 |
| H | 1.62847300  | -0.76254200 | 0.44813300  |
| H | -0.12791400 | -1.41845400 | -2.63790000 |
| H | -2.93972700 | -0.48731900 | 0.51949800  |
| C | -5.22956400 | 3.02321500  | 1.12704300  |
| C | -4.41169000 | 2.20722900  | 1.90771900  |
| C | -3.04833600 | 2.11460300  | 1.61746500  |
| C | -2.50536800 | 2.84426500  | 0.55917700  |
| C | -3.33372300 | 3.65328300  | -0.21784700 |
| C | -4.70752500 | 3.75022800  | 0.04652900  |
| H | -6.29047000 | 3.09037900  | 1.35389900  |
| H | -4.83432000 | 1.63813900  | 2.72989600  |
| H | -1.44590700 | 2.76371000  | 0.34396000  |
| H | -2.90887200 | 4.21052800  | -1.04919900 |
| S | -2.03343500 | 0.95038100  | 2.54861800  |
| O | -2.15092800 | 1.31204700  | 3.98116200  |
| O | -2.66789600 | -0.38589300 | 2.23411300  |
| O | -0.65541800 | 1.06001300  | 1.98534000  |
| C | -5.59235200 | 4.61366000  | -0.81835300 |

|   |             |            |             |
|---|-------------|------------|-------------|
| H | -5.55499900 | 4.28969800 | -1.86505500 |
| H | -6.63522900 | 4.57746500 | -0.49113200 |
| H | -5.26786100 | 5.66056000 | -0.79669700 |

## N-TSA2

|   |             |             |             |
|---|-------------|-------------|-------------|
| C | 0.94674400  | -2.44253200 | -0.50935500 |
| C | 0.39415200  | -2.23122400 | 0.77290800  |
| C | 0.26275000  | -3.33100800 | 1.63843900  |
| C | 0.67700700  | -4.60423400 | 1.26358200  |
| C | 1.23591700  | -4.79493100 | -0.01200800 |
| C | 1.36511600  | -3.70373800 | -0.89225900 |
| H | 1.07159900  | -1.61925200 | -1.20358600 |
| H | -0.16403300 | -3.18216400 | 2.62682700  |
| H | 0.57122600  | -5.42919700 | 1.95715200  |
| H | 1.80847200  | -3.87041700 | -1.86823200 |
| O | 1.68165300  | -5.98162000 | -0.48378800 |
| C | 1.61230100  | -7.13145800 | 0.36494700  |
| H | 0.57533900  | -7.37333300 | 0.62585600  |
| H | 2.03998200  | -7.95238700 | -0.21215300 |
| H | 2.19778300  | -6.98781500 | 1.28036900  |
| C | -0.05328300 | -0.91759000 | 1.21701800  |
| C | 0.54599900  | 0.35005200  | 0.67346500  |
| H | 0.62786500  | 0.34349300  | -0.41639900 |
| H | -0.06144400 | 1.20846200  | 0.97500200  |
| C | 1.87798600  | 0.42230200  | 1.33731500  |
| C | 2.18312900  | 0.93778200  | 2.61420400  |
| C | 4.07602000  | 0.10870600  | 1.61524700  |
| N | 3.05296400  | -0.08946500 | 0.79238500  |
| N | 3.60654000  | 0.72004300  | 2.72549000  |
| C | 5.49621500  | -0.20069000 | 1.31421000  |
| H | 5.93968400  | -0.83498100 | 2.08930900  |
| H | 5.56381000  | -0.71555700 | 0.35377300  |
| H | 6.08790500  | 0.72024300  | 1.25532900  |
| C | 4.38638600  | 1.13421700  | 3.87475600  |
| H | 5.15728500  | 1.85425700  | 3.58514600  |
| H | 3.69099100  | 1.60738300  | 4.57026600  |
| H | 4.85898700  | 0.27649000  | 4.36223600  |
| O | 1.49746400  | 1.47517600  | 3.50842400  |
| C | -3.88375100 | 0.25469700  | 0.69825800  |
| C | -4.70037200 | 1.10683900  | 1.46379100  |
| C | -5.98058300 | 1.43508700  | 1.03026300  |
| C | -6.45306800 | 0.91455600  | -0.20054500 |

|   |             |             |             |
|---|-------------|-------------|-------------|
| C | -5.61562300 | 0.06564900  | -0.97004900 |
| C | -4.35032900 | -0.26951300 | -0.52355900 |
| H | -4.35510300 | 1.50612700  | 2.41201900  |
| H | -3.72140600 | -0.91007200 | -1.13107900 |
| O | -6.05790100 | -0.42088800 | -2.17376200 |
| O | -7.67659100 | 1.30726500  | -0.61999700 |
| O | -6.70156800 | 2.28758100  | 1.80801000  |
| C | -6.00508800 | 0.54383600  | -3.24330000 |
| H | -6.61941600 | 1.42325100  | -3.01930600 |
| H | -4.97131100 | 0.85916500  | -3.42620000 |
| H | -6.39582300 | 0.04041300  | -4.12930300 |
| C | -8.61318200 | 0.31004900  | -1.08960500 |
| H | -8.50027300 | -0.62144300 | -0.52841900 |
| H | -9.60305600 | 0.73193900  | -0.90681700 |
| H | -8.48604100 | 0.11332600  | -2.15524500 |
| C | -8.08344000 | 1.98220000  | 2.07764300  |
| H | -8.30586600 | 2.44543900  | 3.04177600  |
| H | -8.73950100 | 2.39676500  | 1.30968400  |
| H | -8.24442100 | 0.90148200  | 2.15373000  |
| C | -2.56767600 | -0.05926900 | 1.18448800  |
| O | -1.79205500 | -0.83880300 | 0.58375300  |
| H | -2.24004900 | 0.41388800  | 2.12068100  |
| H | -0.30677000 | -0.85650700 | 2.27422600  |
| H | 3.16229800  | -0.47578200 | -0.16689000 |
| C | 3.36282700  | 3.69305200  | -0.59022300 |
| C | 2.80015400  | 2.61974300  | -1.28548100 |
| C | 3.63025700  | 1.69861400  | -1.92073500 |
| C | 5.01995400  | 1.85777100  | -1.87829400 |
| C | 5.56956000  | 2.93171900  | -1.18422400 |
| C | 4.75057100  | 3.86260500  | -0.52161000 |
| H | 2.71183000  | 4.40264600  | -0.08623500 |
| H | 1.72515200  | 2.48522300  | -1.32478100 |
| H | 5.66458400  | 1.14042000  | -2.37669000 |
| H | 6.64975200  | 3.05036700  | -1.14787200 |
| C | 5.36285000  | 5.02169400  | 0.22553100  |
| H | 4.62424200  | 5.53191800  | 0.85030800  |
| H | 6.18423200  | 4.69002200  | 0.87027000  |
| H | 5.78026600  | 5.76096700  | -0.46937500 |
| S | 2.94255300  | 0.22061100  | -2.69279700 |
| O | 3.49988600  | 0.14922200  | -4.06451100 |
| O | 1.45980400  | 0.36920300  | -2.62126300 |
| O | 3.44266500  | -0.89820000 | -1.80619900 |

## N-TSA3

|   |             |             |             |
|---|-------------|-------------|-------------|
| C | -3.93004300 | -0.16675500 | 0.12442100  |
| C | -3.70456600 | 0.40107900  | -1.16161400 |
| C | -4.54652500 | 1.46016100  | -1.58873200 |
| C | -5.58305800 | 1.92197400  | -0.80200100 |
| C | -5.79715900 | 1.33592200  | 0.46519900  |
| C | -4.95828400 | 0.29414900  | 0.91791200  |
| H | -3.29246200 | -0.96193600 | 0.49970500  |
| H | -4.37165300 | 1.91115900  | -2.56141200 |
| H | -6.21676900 | 2.72445300  | -1.15701900 |
| H | -5.14169400 | -0.12790500 | 1.90020900  |
| O | -6.76865600 | 1.70406600  | 1.31168400  |
| C | -7.66194300 | 2.76833100  | 0.94489700  |
| H | -8.22682200 | 2.51585300  | 0.04135900  |
| H | -8.34711300 | 2.87486200  | 1.78602600  |
| H | -7.11613200 | 3.70577800  | 0.79545800  |
| C | -2.65100800 | -0.02179400 | -2.01537400 |
| C | -1.93782900 | -1.34393900 | -1.89510000 |
| H | -2.10971400 | -1.80623500 | -0.92031200 |
| H | -2.45284000 | -1.97577100 | -2.63719900 |
| C | -0.47700000 | -1.31060800 | -2.19721100 |
| C | 0.19014600  | -1.14501100 | -3.42113700 |
| C | 1.67439700  | -0.95004300 | -1.66901100 |
| N | 0.45773400  | -1.15855400 | -1.17695200 |
| N | 1.57038500  | -0.94463200 | -3.01564800 |
| C | 2.90098600  | -0.70525400 | -0.86966800 |
| H | 3.26193600  | 0.32037600  | -1.01449200 |
| H | 2.68347000  | -0.84660600 | 0.19121200  |
| H | 3.70831000  | -1.38842100 | -1.15475400 |
| C | 2.64655800  | -0.72894000 | -3.96089500 |
| H | 2.20043600  | -0.77651100 | -4.95615700 |
| H | 3.10774200  | 0.25331000  | -3.81802800 |
| H | 3.41475400  | -1.50265500 | -3.87062000 |
| O | -0.17199100 | -1.14897700 | -4.61800700 |
| C | 0.47489400  | 2.06587000  | -0.00093100 |
| C | 0.89118200  | 1.94338300  | 1.33191900  |
| C | 2.08568900  | 2.52887800  | 1.75323800  |
| C | 2.87882000  | 3.24023100  | 0.82564100  |
| C | 2.45285700  | 3.34289400  | -0.52263200 |
| C | 1.26027300  | 2.76901200  | -0.93151300 |
| H | 0.30762000  | 1.36938400  | 2.04311100  |
| H | 0.95705700  | 2.84238900  | -1.96968700 |
| O | 3.21741000  | 4.01889900  | -1.44254900 |

|   |             |             |             |
|---|-------------|-------------|-------------|
| O | 4.08136900  | 3.73451700  | 1.23596900  |
| O | 2.44665600  | 2.32613400  | 3.05155400  |
| C | 4.42767100  | 3.34032900  | -1.82681200 |
| H | 5.06676500  | 3.13642200  | -0.96194600 |
| H | 4.19365700  | 2.40045800  | -2.34213400 |
| H | 4.94727100  | 4.00925800  | -2.51553900 |
| C | 4.27910300  | 5.16007100  | 1.11736500  |
| H | 3.49459300  | 5.69950700  | 1.65912000  |
| H | 5.24718300  | 5.36344000  | 1.57759300  |
| H | 4.28819300  | 5.47810300  | 0.07288200  |
| C | 2.91968400  | 3.44482300  | 3.82153900  |
| H | 2.74581000  | 3.18020300  | 4.86721100  |
| H | 3.98442400  | 3.62349800  | 3.65857800  |
| H | 2.35420200  | 4.35343300  | 3.58514300  |
| C | -0.74729300 | 1.39387000  | -0.41408000 |
| O | -1.13308100 | 1.36055900  | -1.59225600 |
| H | -1.31646000 | 0.87163300  | 0.36764500  |
| H | -2.61748000 | 0.42197300  | -3.00524400 |
| H | 0.22903200  | -1.16676400 | -0.16734900 |
| C | 1.29223600  | -4.99349100 | -0.11218600 |
| C | 0.25063700  | -4.16461100 | 0.30076800  |
| C | 0.34435700  | -3.49721100 | 1.52389000  |
| C | 1.46758000  | -3.66703300 | 2.33556200  |
| C | 2.50125700  | -4.50247700 | 1.91312500  |
| C | 2.43306100  | -5.17462300 | 0.68379500  |
| H | 1.21950400  | -5.50769100 | -1.06720900 |
| H | -0.62789500 | -4.02905900 | -0.32018700 |
| H | 1.52594800  | -3.15137600 | 3.28870100  |
| H | 3.37498000  | -4.63461500 | 2.54606500  |
| C | 3.54127400  | -6.09653000 | 0.23900800  |
| H | 3.70190400  | -6.03566300 | -0.84219200 |
| H | 4.48492800  | -5.86259500 | 0.74067800  |
| H | 3.29642800  | -7.14101300 | 0.47027500  |
| S | -0.91795600 | -2.30197200 | 1.99213500  |
| O | -0.99624300 | -2.30984500 | 3.47095700  |
| O | -2.16396400 | -2.72265700 | 1.28669000  |
| O | -0.38354500 | -0.99304100 | 1.44699000  |

## N-TSA4

|   |             |            |             |
|---|-------------|------------|-------------|
| C | -2.66806800 | 2.55613200 | -0.13632000 |
| C | -1.66009300 | 2.83259500 | -1.10298000 |
| C | -1.24758700 | 4.18031300 | -1.27677700 |

|   |             |             |             |
|---|-------------|-------------|-------------|
| C | -1.79999400 | 5.20847400  | -0.54004400 |
| C | -2.79925800 | 4.90903400  | 0.41261500  |
| C | -3.22562900 | 3.57470300  | 0.60160700  |
| H | -3.03611400 | 1.54943200  | 0.01943800  |
| H | -0.47067100 | 4.40222000  | -2.00277300 |
| H | -1.46582000 | 6.22638700  | -0.69425100 |
| H | -4.00214600 | 3.37591100  | 1.33240300  |
| O | -3.40594500 | 5.82211700  | 1.18122300  |
| C | -3.05040000 | 7.20845800  | 1.04881200  |
| H | -3.26476100 | 7.57365800  | 0.03912800  |
| H | -3.67334300 | 7.73848500  | 1.76936400  |
| H | -1.99422300 | 7.36859300  | 1.28877100  |
| C | -1.04959700 | 1.83031900  | -1.89254000 |
| C | -1.46531100 | 0.37838200  | -1.90635900 |
| H | -2.55370800 | 0.31003100  | -1.78817900 |
| H | -1.20648000 | -0.03613300 | -2.88437600 |
| C | -0.77871900 | -0.45436000 | -0.86858800 |
| C | 0.48318100  | -1.04118200 | -0.98217000 |
| C | -0.40198900 | -1.51583100 | 1.06160600  |
| N | -1.26962400 | -0.75743600 | 0.39089700  |
| N | 0.67924500  | -1.69925400 | 0.27403800  |
| C | -0.62630400 | -2.10553400 | 2.40561600  |
| H | 0.16548200  | -1.81297500 | 3.10395300  |
| H | -1.58599900 | -1.76564900 | 2.79973500  |
| H | -0.64178800 | -3.20023200 | 2.35670700  |
| C | 1.87557000  | -2.45109300 | 0.60915600  |
| H | 2.55650100  | -2.35416000 | -0.23733000 |
| H | 2.35280800  | -2.04385200 | 1.50367200  |
| H | 1.63922900  | -3.50692200 | 0.76978900  |
| O | 1.35400700  | -0.98504400 | -1.89242400 |
| C | 3.13978300  | 0.99070300  | -0.90936000 |
| C | 4.28907000  | 0.76850200  | -1.67299600 |
| C | 5.47785000  | 0.36123600  | -1.06449000 |
| C | 5.51690200  | 0.16439300  | 0.33280100  |
| C | 4.35129100  | 0.40709000  | 1.09446600  |
| C | 3.17766000  | 0.82400300  | 0.48229800  |
| H | 4.27224700  | 0.87914700  | -2.75272900 |
| H | 2.29314800  | 1.00019500  | 1.08258200  |
| O | 4.34714200  | 0.20033500  | 2.45552400  |
| O | 6.69955600  | -0.18979200 | 0.92787100  |
| O | 6.56537800  | 0.21294100  | -1.87771000 |
| C | 5.11541100  | 1.15136600  | 3.21435300  |
| H | 6.17033600  | 1.13839300  | 2.92357300  |
| H | 4.71178400  | 2.16306200  | 3.08491700  |



|   |             |             |             |
|---|-------------|-------------|-------------|
| H | 5.02124100  | 0.85478100  | 4.26100000  |
| C | 6.71584000  | -1.47388700 | 1.58297800  |
| H | 6.52149800  | -2.27588100 | 0.86151100  |
| H | 7.72105300  | -1.58962400 | 1.99248200  |
| H | 5.97945600  | -1.51928300 | 2.38899000  |
| C | 7.35870200  | -0.97840100 | -1.75548500 |
| H | 7.88661900  | -1.08481300 | -2.70636200 |
| H | 8.08300100  | -0.89983100 | -0.94173900 |
| H | 6.72523300  | -1.85923200 | -1.59943400 |
| C | 1.87801400  | 1.34802700  | -1.56824300 |
| O | 0.88498300  | 1.71701100  | -0.91331400 |
| H | 1.87452300  | 1.37962600  | -2.66546700 |
| H | -0.46496500 | 2.17739700  | -2.73869700 |
| H | -2.21563500 | -0.51278400 | 0.75039300  |
| C | -2.79603600 | -4.07294700 | -1.34667900 |
| C | -3.44624300 | -2.84522800 | -1.21622500 |
| C | -4.04237200 | -2.50595500 | -0.00186300 |
| C | -4.00565900 | -3.39756200 | 1.07389900  |
| C | -3.35505400 | -4.62154600 | 0.93148200  |
| C | -2.72956200 | -4.97409100 | -0.27518300 |
| H | -2.32801400 | -4.33203300 | -2.29300300 |
| H | -3.48833000 | -2.14684900 | -2.04437500 |
| H | -4.48025100 | -3.13631000 | 2.01463000  |
| H | -3.32898000 | -5.31420300 | 1.76883300  |
| C | -1.98584600 | -6.27988400 | -0.40971300 |
| H | -0.91629100 | -6.14243600 | -0.20508000 |
| H | -2.35951300 | -7.02956600 | 0.29414600  |
| H | -2.07073500 | -6.68673100 | -1.42223300 |
| S | -4.76038400 | -0.86944300 | 0.23742200  |
| O | -6.11593300 | -1.06513200 | 0.80189600  |
| O | -4.71417100 | -0.19862400 | -1.09206000 |
| O | -3.81513100 | -0.21847300 | 1.22933000  |
